# Supplementary material for: Benefits from high-density rain gauge observations for hydrological response analysis in a small alpine catchment
Source: Copernicus journal article supplement (doi:10.5194/hess-25-2301-2021), 2021-04-28
Supplement: Supplementary file 1 [file hess-25-2301-2021-supplement.zip]

Archive with 4 entries (4 files):
- Supplementary material Part 2.docx
- hess-25-2301-2021-supplement-title-page.pdf
- Supplementary material Part 1.docx
- events_data.xlsx
