# Supplementary material for: Benefits from high-density rain gauge observations for hydrological response analysis in a small alpine catchment
Source: Copernicus journal article supplement (doi:10.5194/hess-25-2301-2021), 2021-04-28
Supplement: Supplementary file 1 [file hess-25-2301-2021-supplement.zip › hess-25-2301-2021-supplement-title-page.pdf]

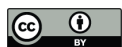

*Supplement of*

## **Benefits from high-density rain gauge observations for hydrological response analysis in a small alpine catchment**

**Anthony Michelon et al.**

*Correspondence to:* Anthony Michelon ([anthony.michelon@unil.ch](mailto:anthony.michelon@unil.ch))

- [hess-25-2301-2021-supplement-title-page.pdf](#)
- [Supplementary material Part 1.docx](#)
- [Supplementary material Part 2.docx](#)
- [events\\_data.xlsx](#)

The copyright of individual parts of the supplement might differ from the article licence.
