# Supplementary material for: Benefits from high-density rain gauge observations for hydrological response analysis in a small alpine catchment
Source: Copernicus journal article supplement (doi:10.5194/hess-25-2301-2021), 2021-04-28
Supplement: Supplementary file 1 [file hess-25-2301-2021-supplement.zip › Supplementary material Part 2.docx]

Even event-scale hydrological response characterization benefits from high density rain gauge observations - *Supplementary Material, Part 2*

Anthony Michelon1, Lionel Benoit1, Harsh Beria1, Natalie Ceperley1,2, Bettina Schaefli1,2

1 Institute of Earth Surface Dynamics (IDYST), Faculty of Geosciences and Environment, University of Lausanne, Lausanne, 1015, Switzerland

2 Now at: Institute of Geography (GIUB), Faculty of Science, University of Berne, Switzerland

*Correspondence to*: Anthony Michelon (anthony.michelon@unil.ch)

Detail of all the 48 rainfall events measured over the observation period.

Each figure presents:

- On the left, a map with the 12 rain gauge locations shows the total amount of rainfall recorded by each station during the event (a red cross is displayed in case of missing data).
- On top is plotted the rainfall intensity recorded by each of the 12 rain gauges (the y-axis scale between 2 stations is 20 mm/h). The rainfall event extent is marked out by green dashed lines.
- Below is shown the areal rainfall intensity (and uncertainty) calculated for the catchment using the stochastic method. The rainfall event extent is marked out by green dashed lines.
- Below the horizontal line the zoomed hydrogram shows a detailed view of the river discharge (and uncertainty). In case a river reaction is associated, the discharge event extent is marked out by red dashed lines. Between these vertical lines is drawn a line joining the initial and final baseflow, separating the streamflow fed by the baseflow (under the line) to the fast streamflow (over the line). The red square shows the center of mass of the fast streamflow part. The shaded orange areas correspond to periods the river streamflow data are not available.
- At the bottom is shown the general hydrogram over the whole observation period (July 1st to September 23th). The red dashed lines mark out the period the other plots are focusing on. The shaded orange areas correspond to periods the river streamflow data are not available.


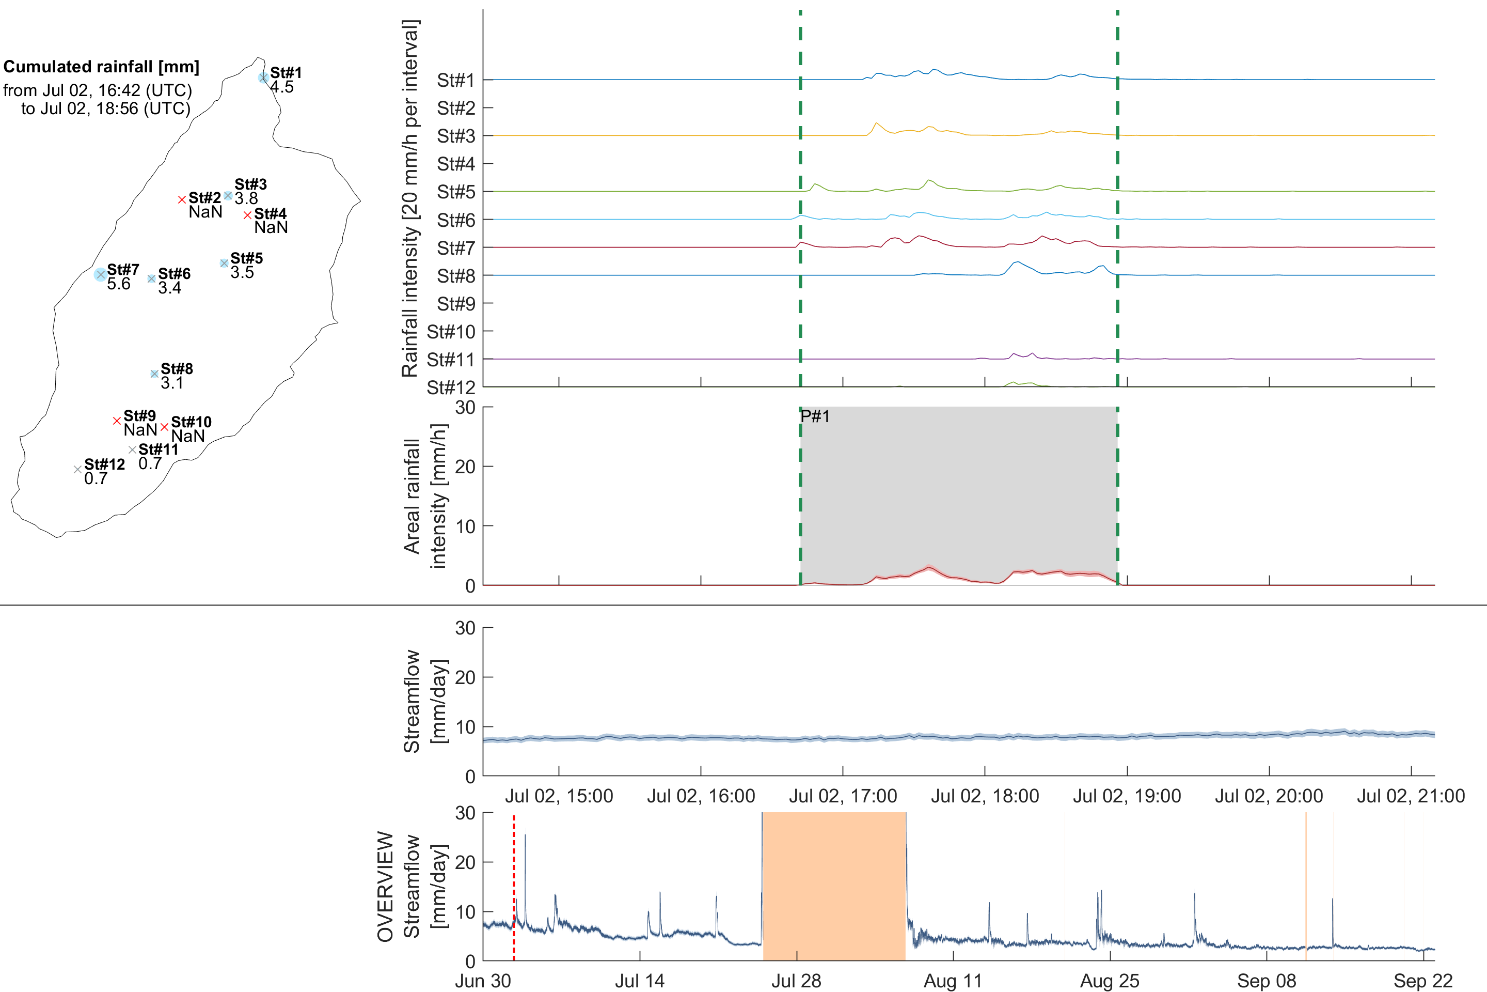


Figure S1. Precipitation event No. 1 from July 2nd 04:42 PM to July 2nd 06:56 PM


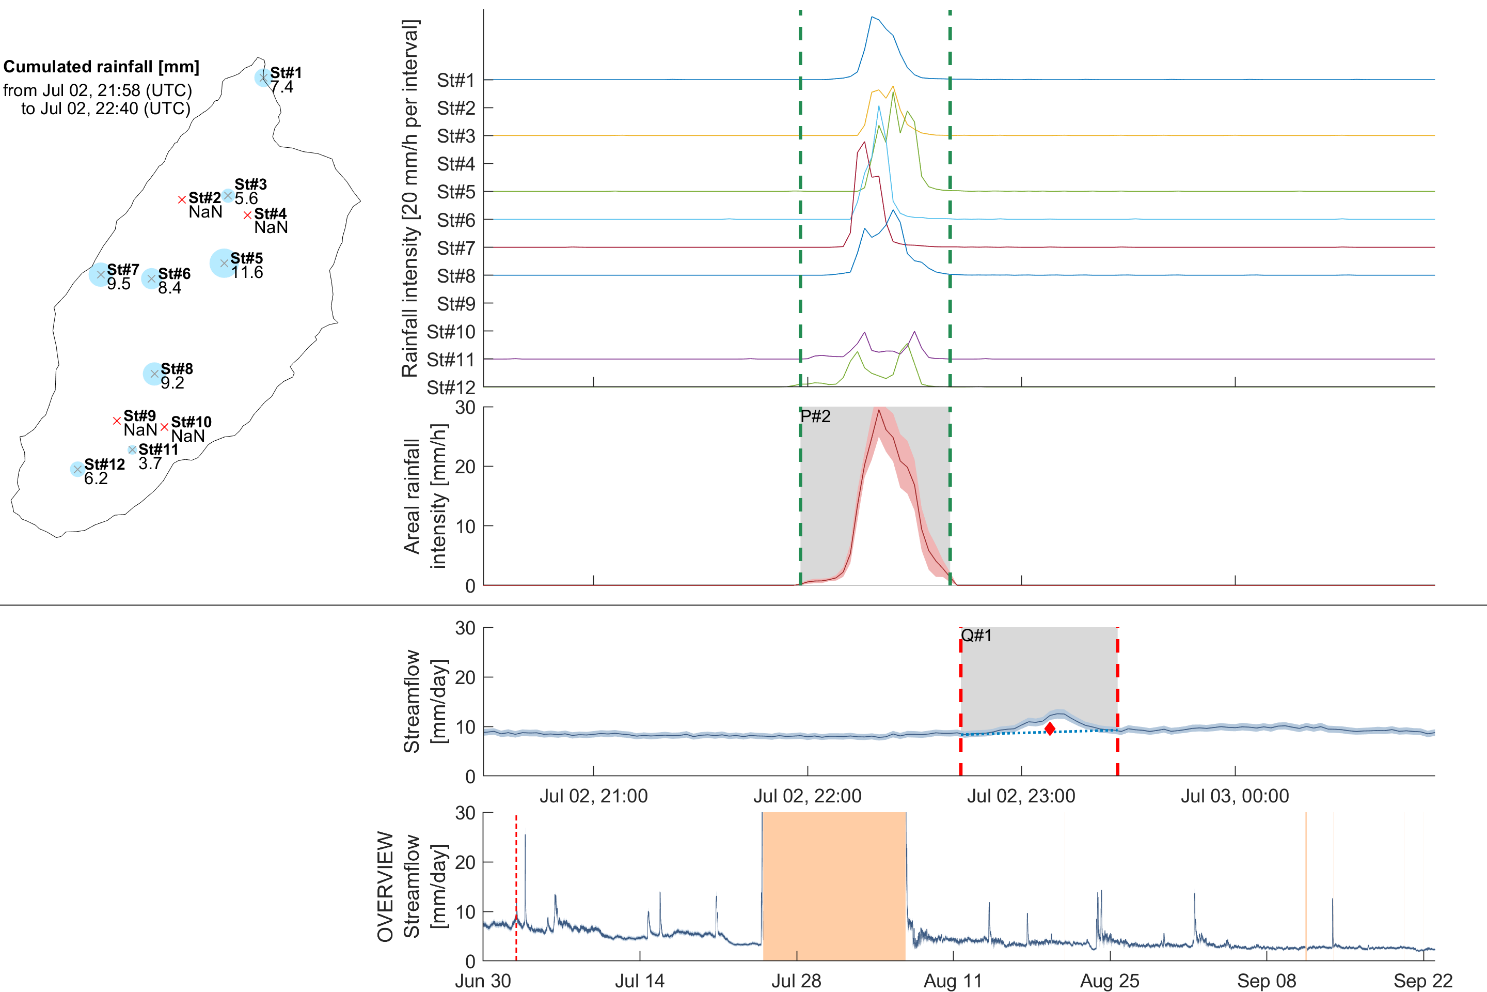


Figure S2. Precipitation event No. 2 from July 2nd 09:58 PM to July 2nd 10:40 PM
and discharge event No. 1 from July 2nd 10:43 PM to July 2nd 11:27 PM


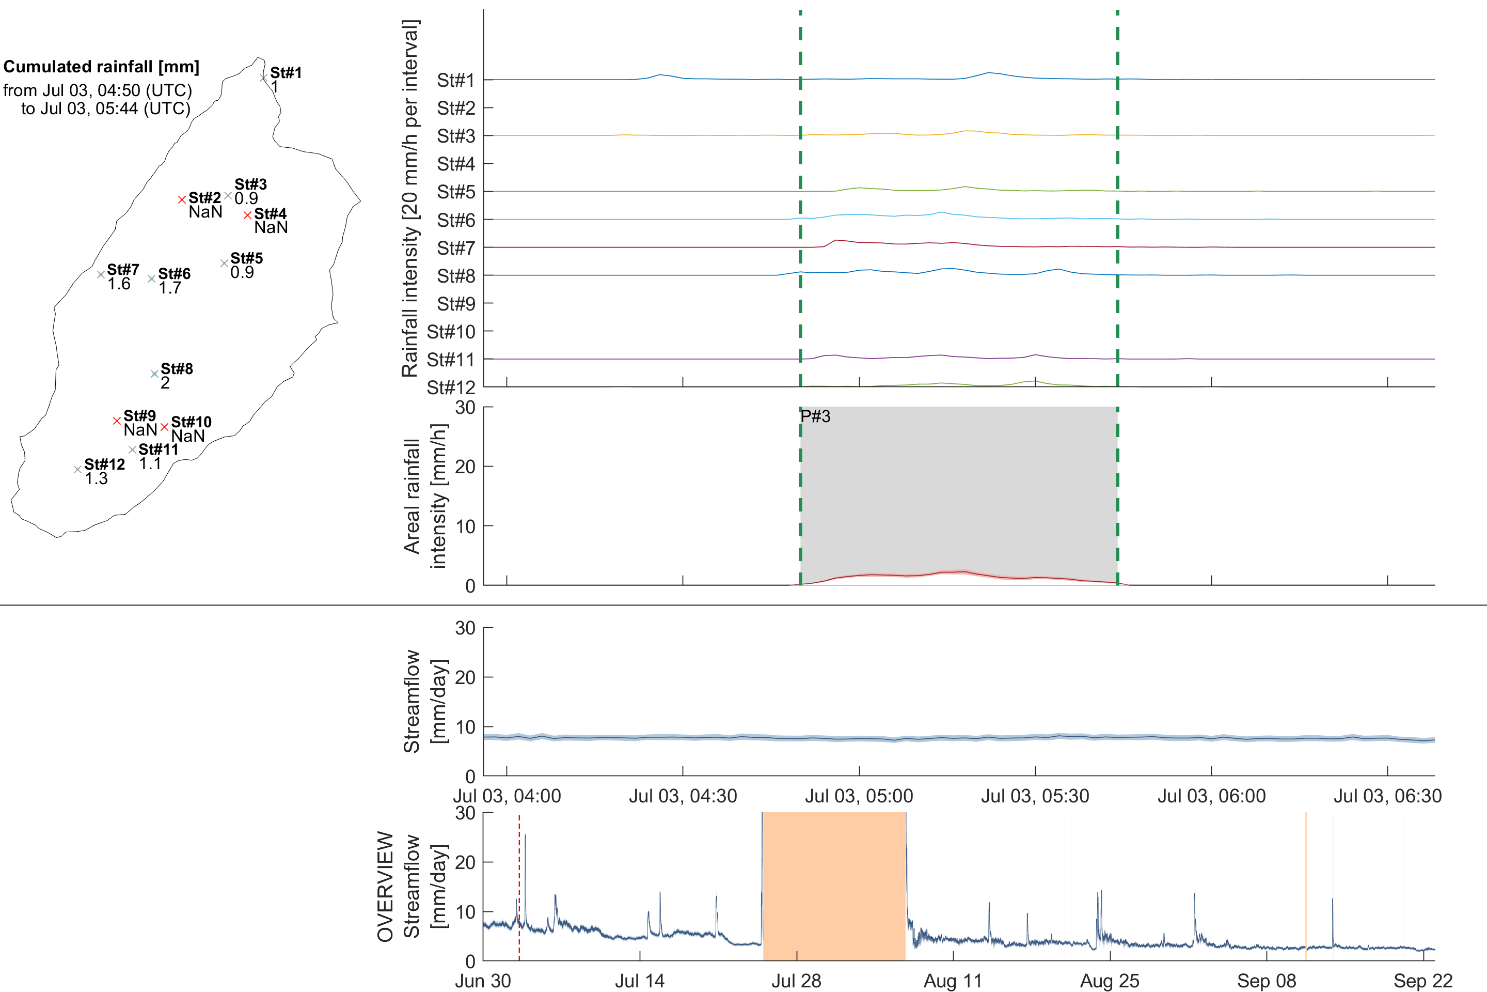


Figure S3. Precipitation event No. 3 from July 3rd 04:50 AM to July 3rd 05:44 AM


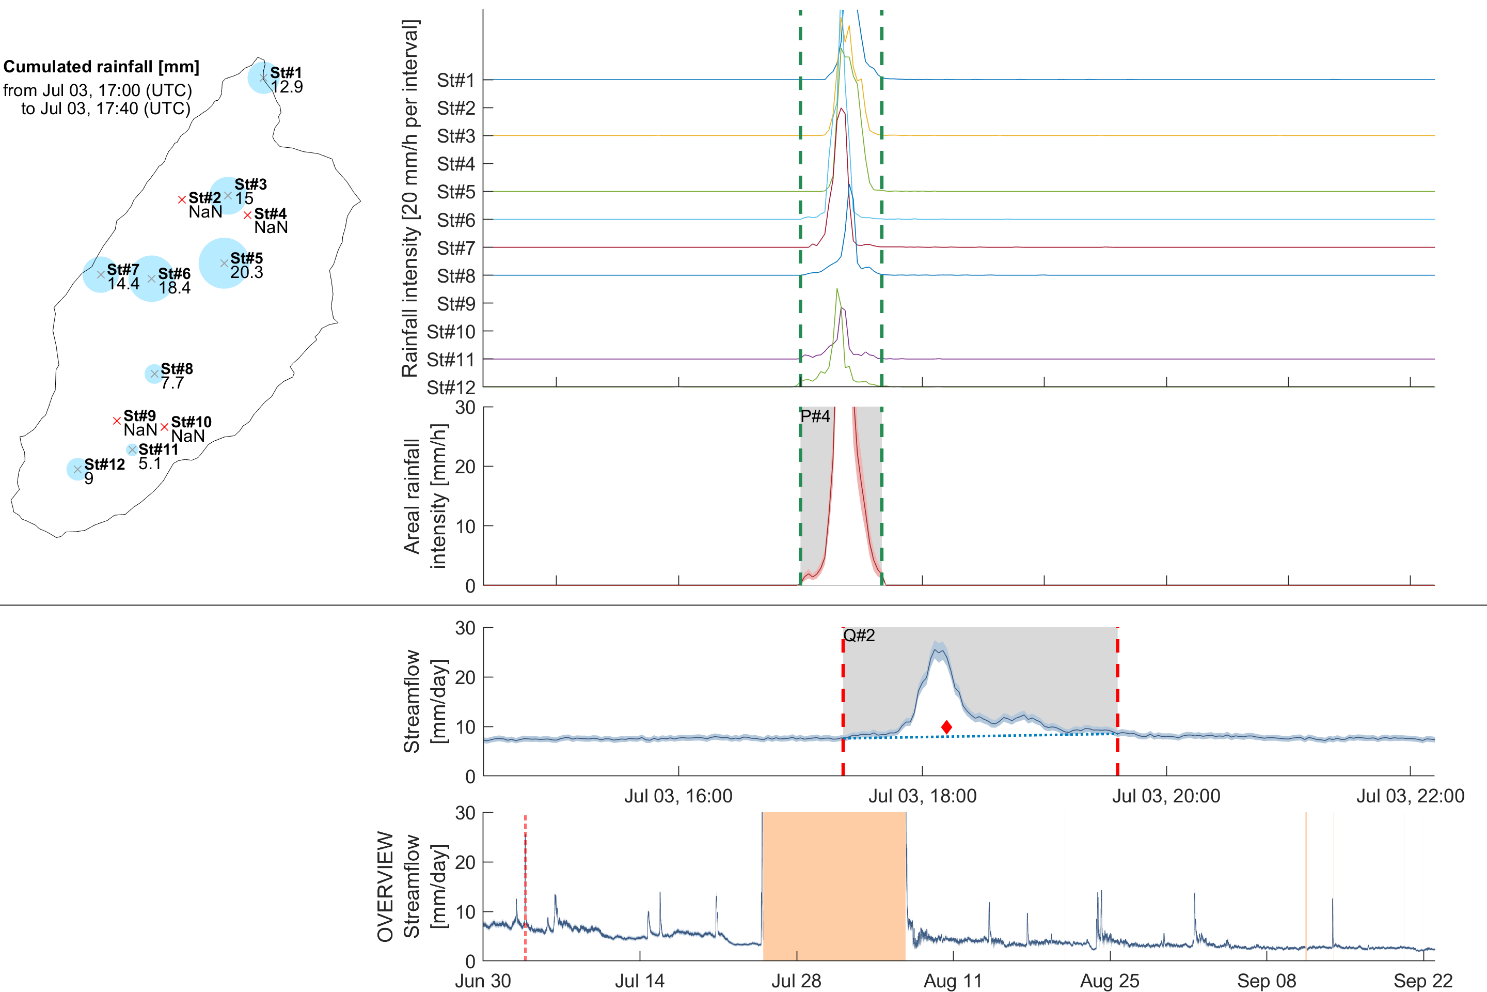


Figure S4. Precipitation event No. 4 from July 3rd 05:00 PM to July 3rd 05:40 PM
and discharge event No. 2 from July 3rd 05:21 PM to July 3rd 07:36 PM


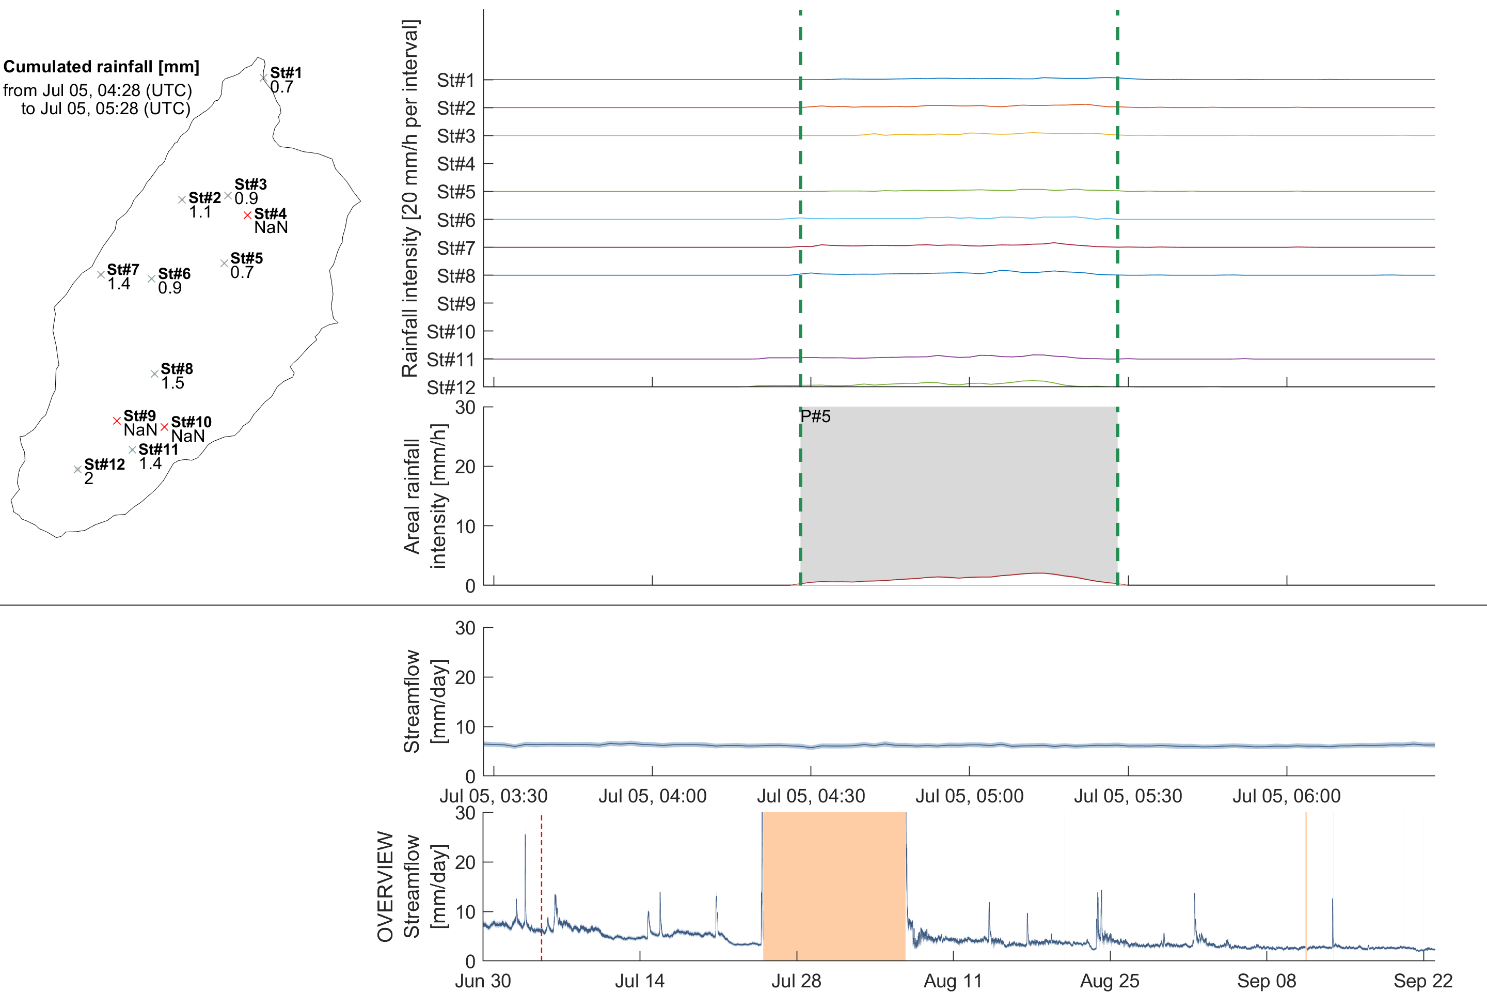


Figure S5. Precipitation event No. 5 from July 5th 04:28 AM to July 5th 05:28 AM


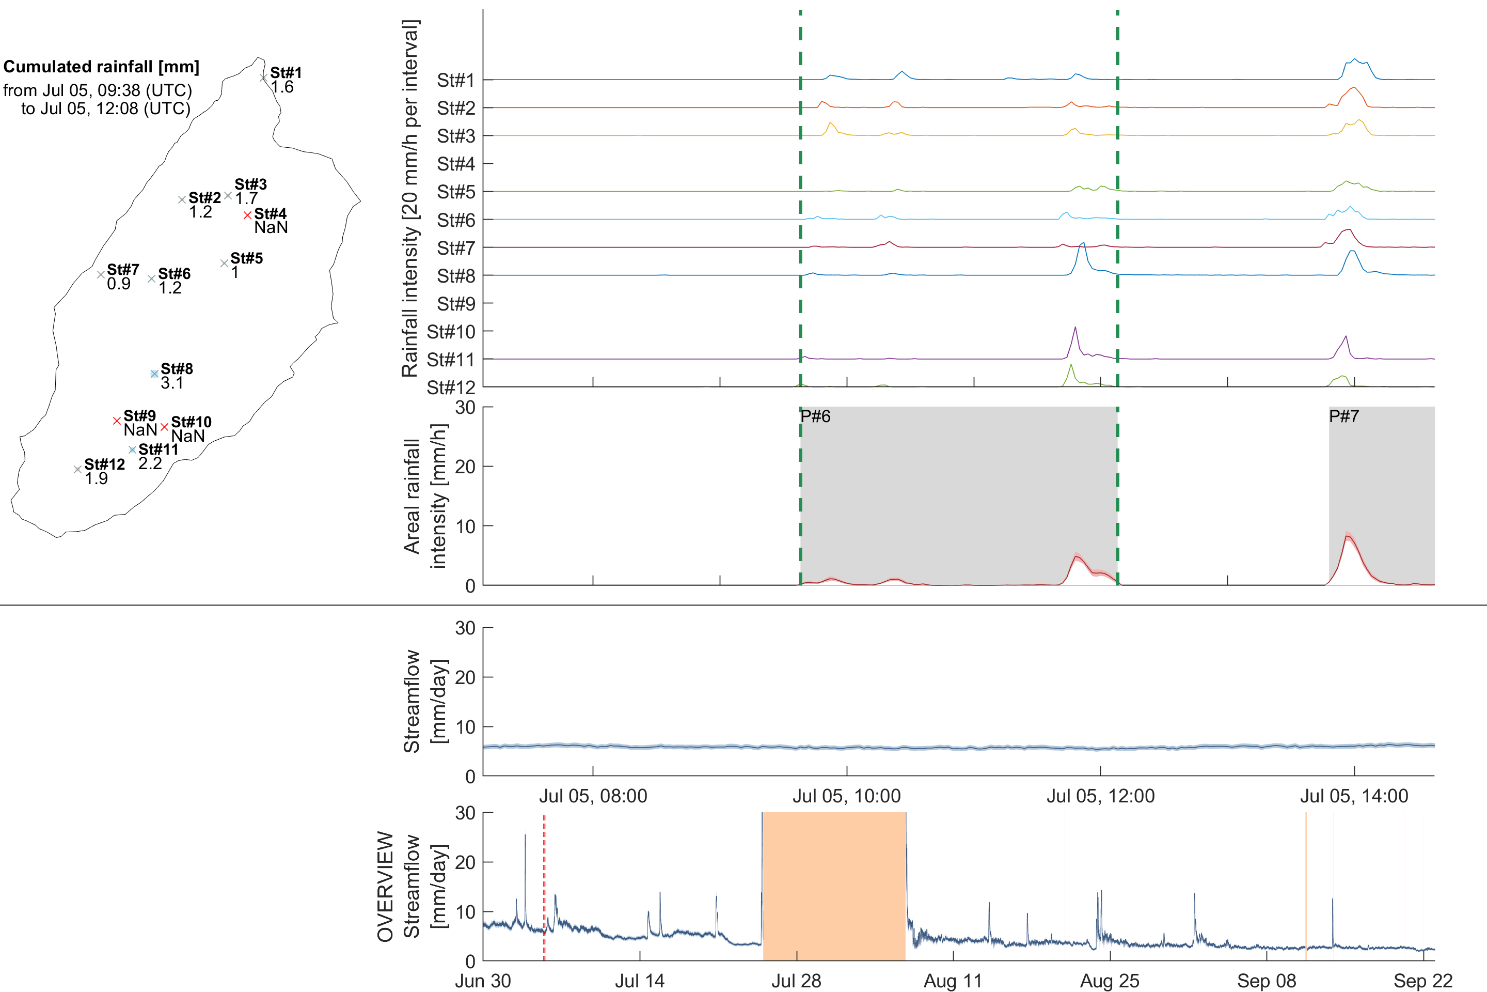


Figure S6. Precipitation event No. 6 from July 5th 09:38 AM to July 5th 12:08 PM


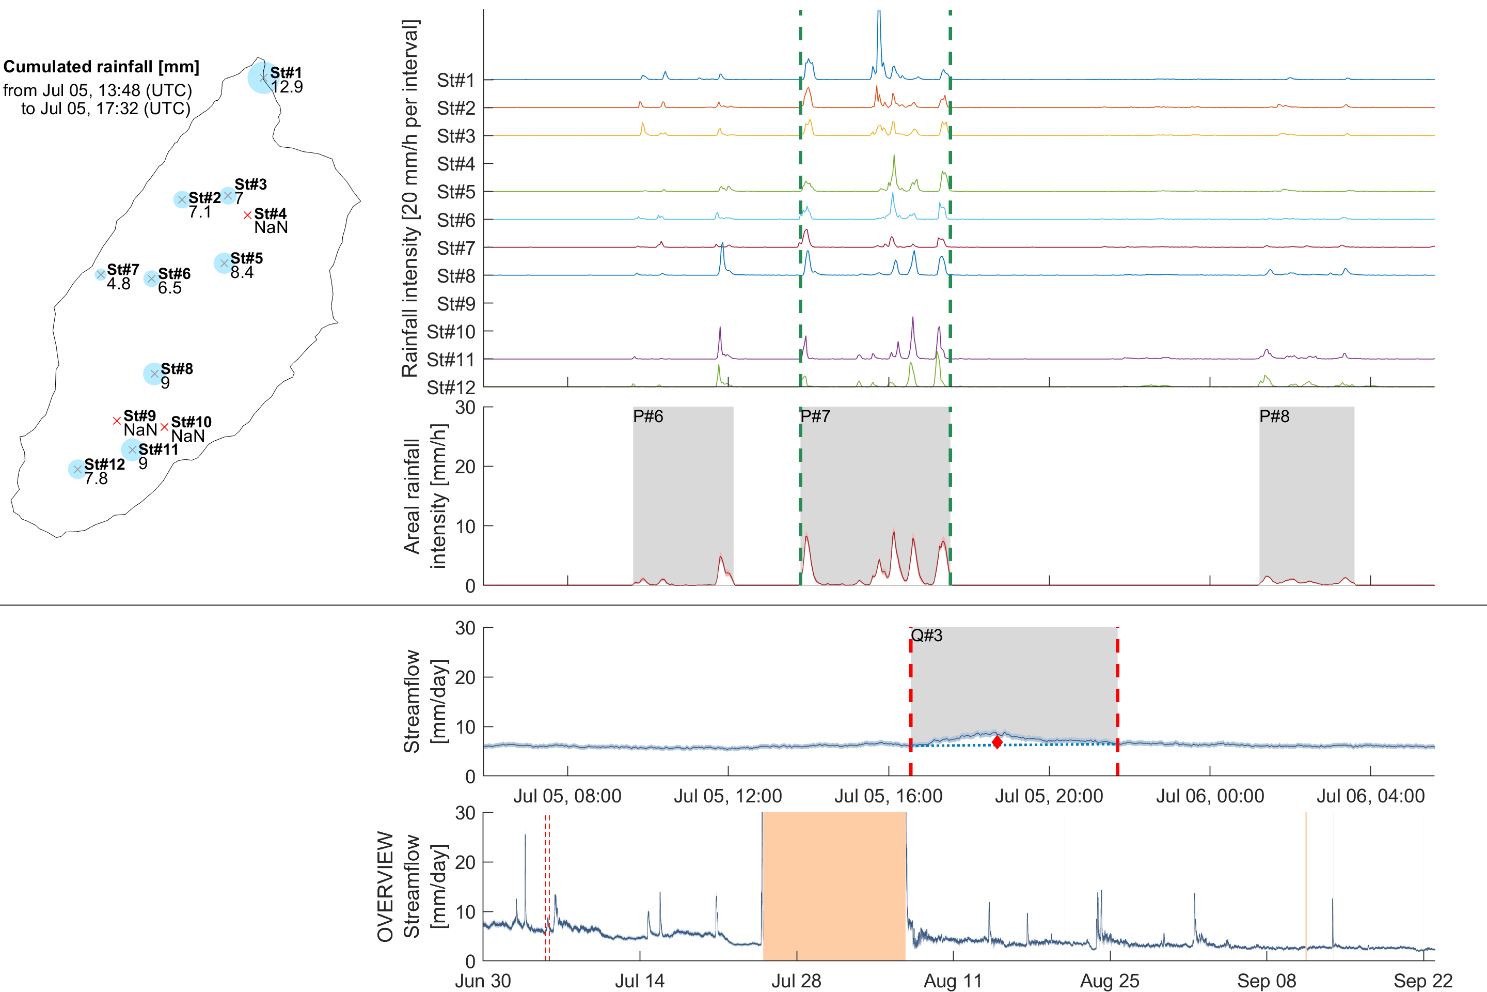


Figure S7. Precipitation event No. 7 from July 5th 01:48 PM to July 5th 05:32 PM
and discharge event No. 3 from July 5th 04:33 PM to July 5th 09:42 PM


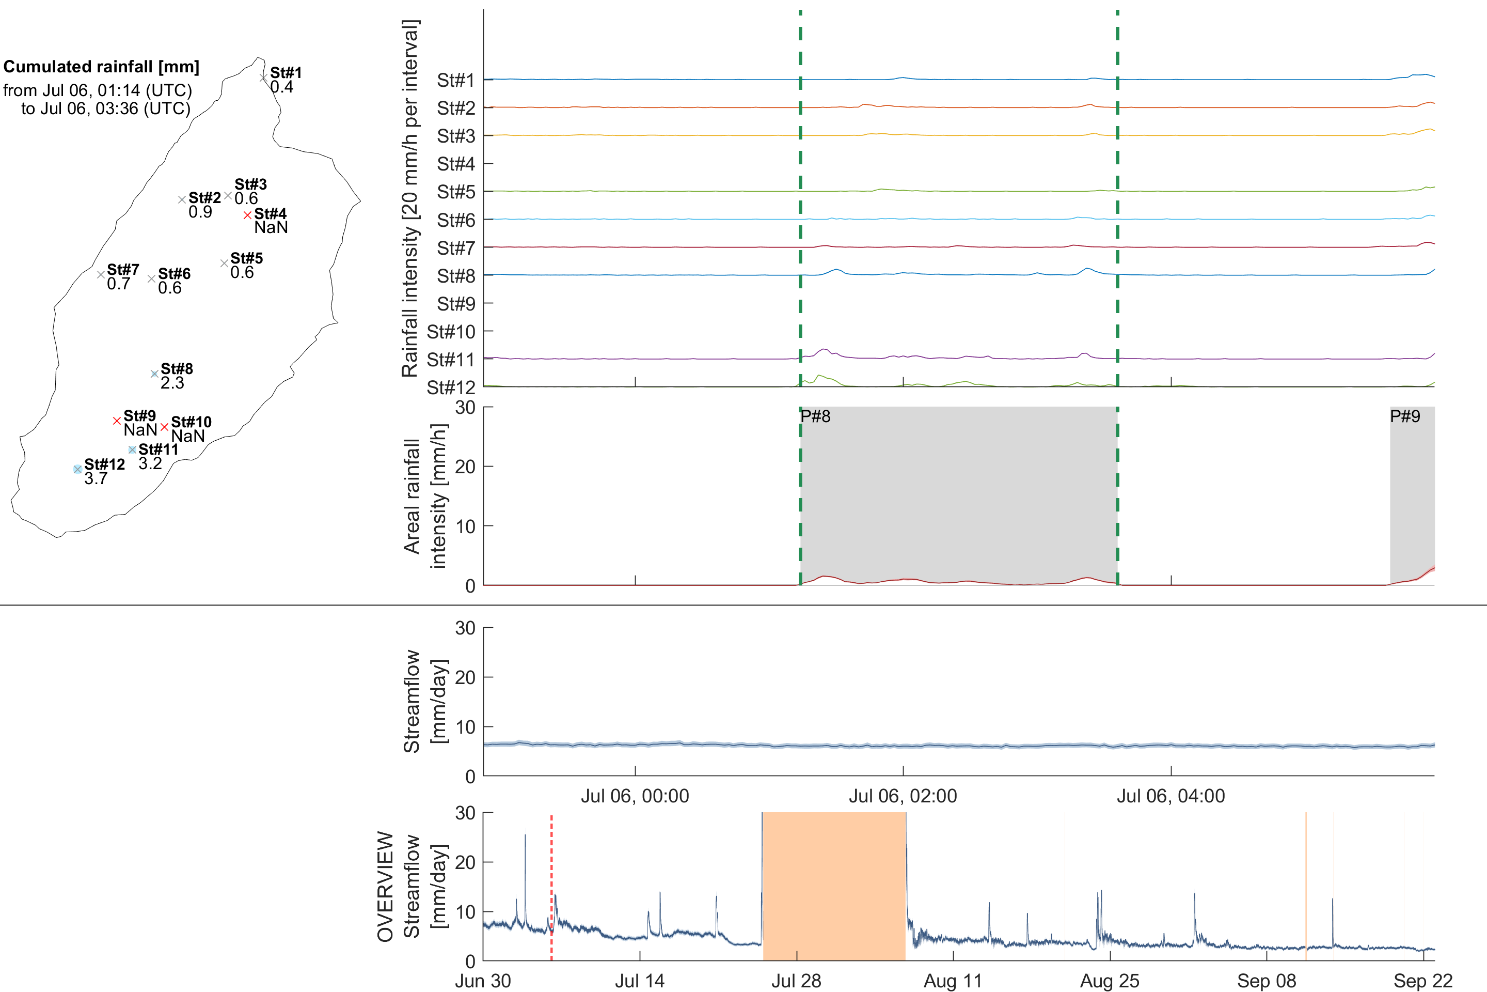


Figure S8. Precipitation event No. 8 from July 6th 01:14 AM to July 6th 03:36 AM


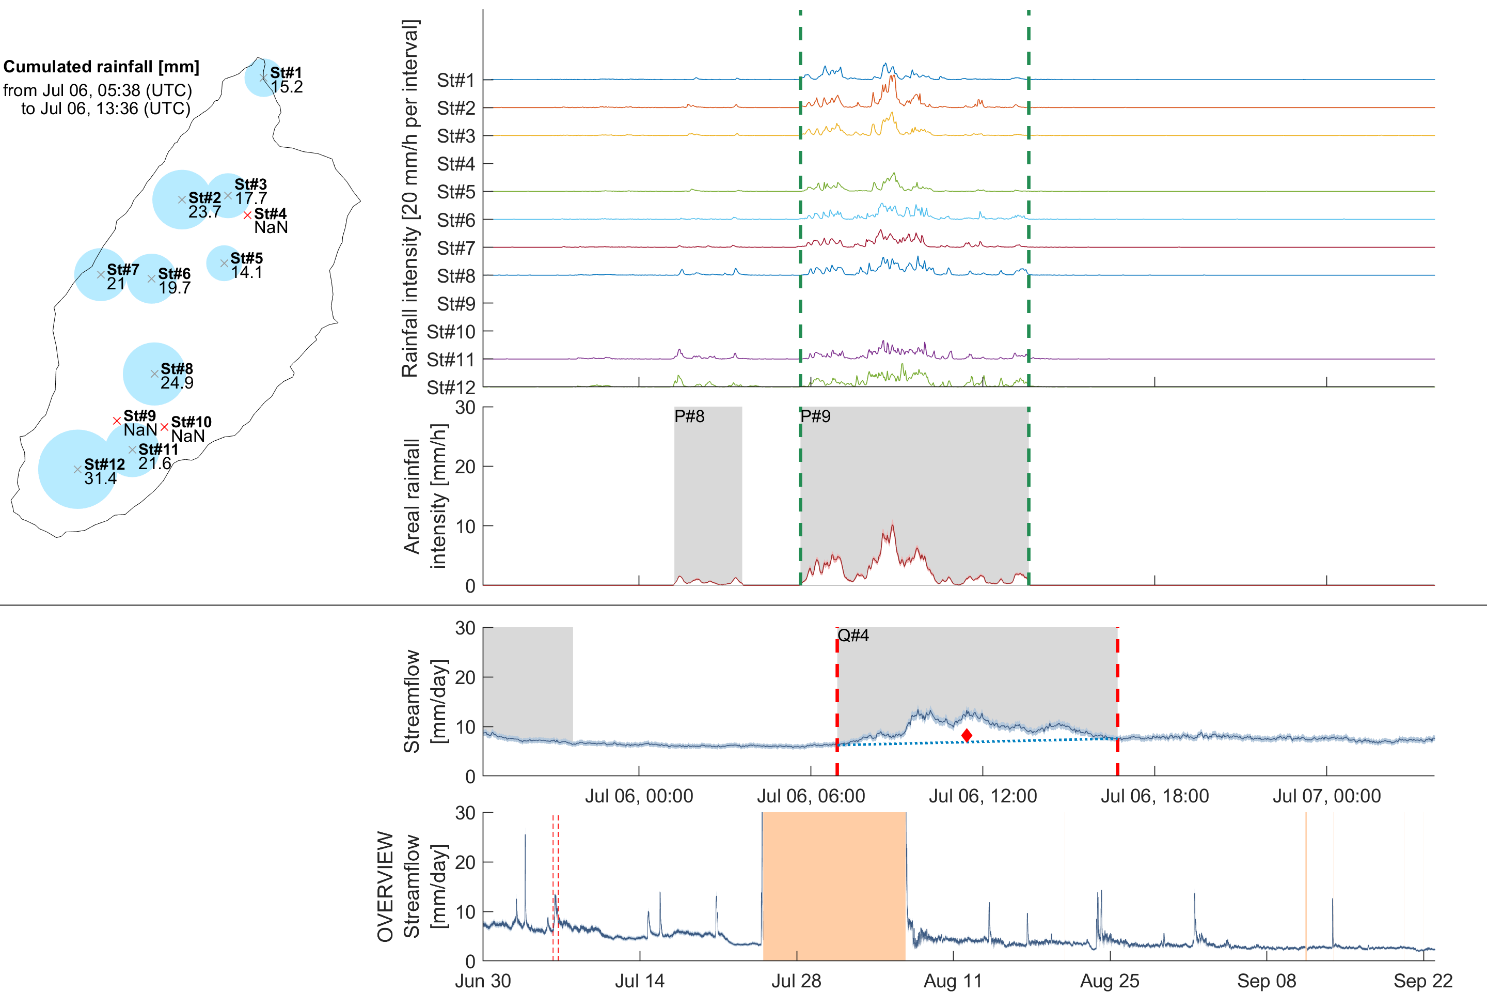


Figure S9. Precipitation event No. 9 from July 6th 05:38 AM to July 6th 01:36 PM
and discharge event No. 4 from July 6th 06:55 AM to July 6th 04:42 PM


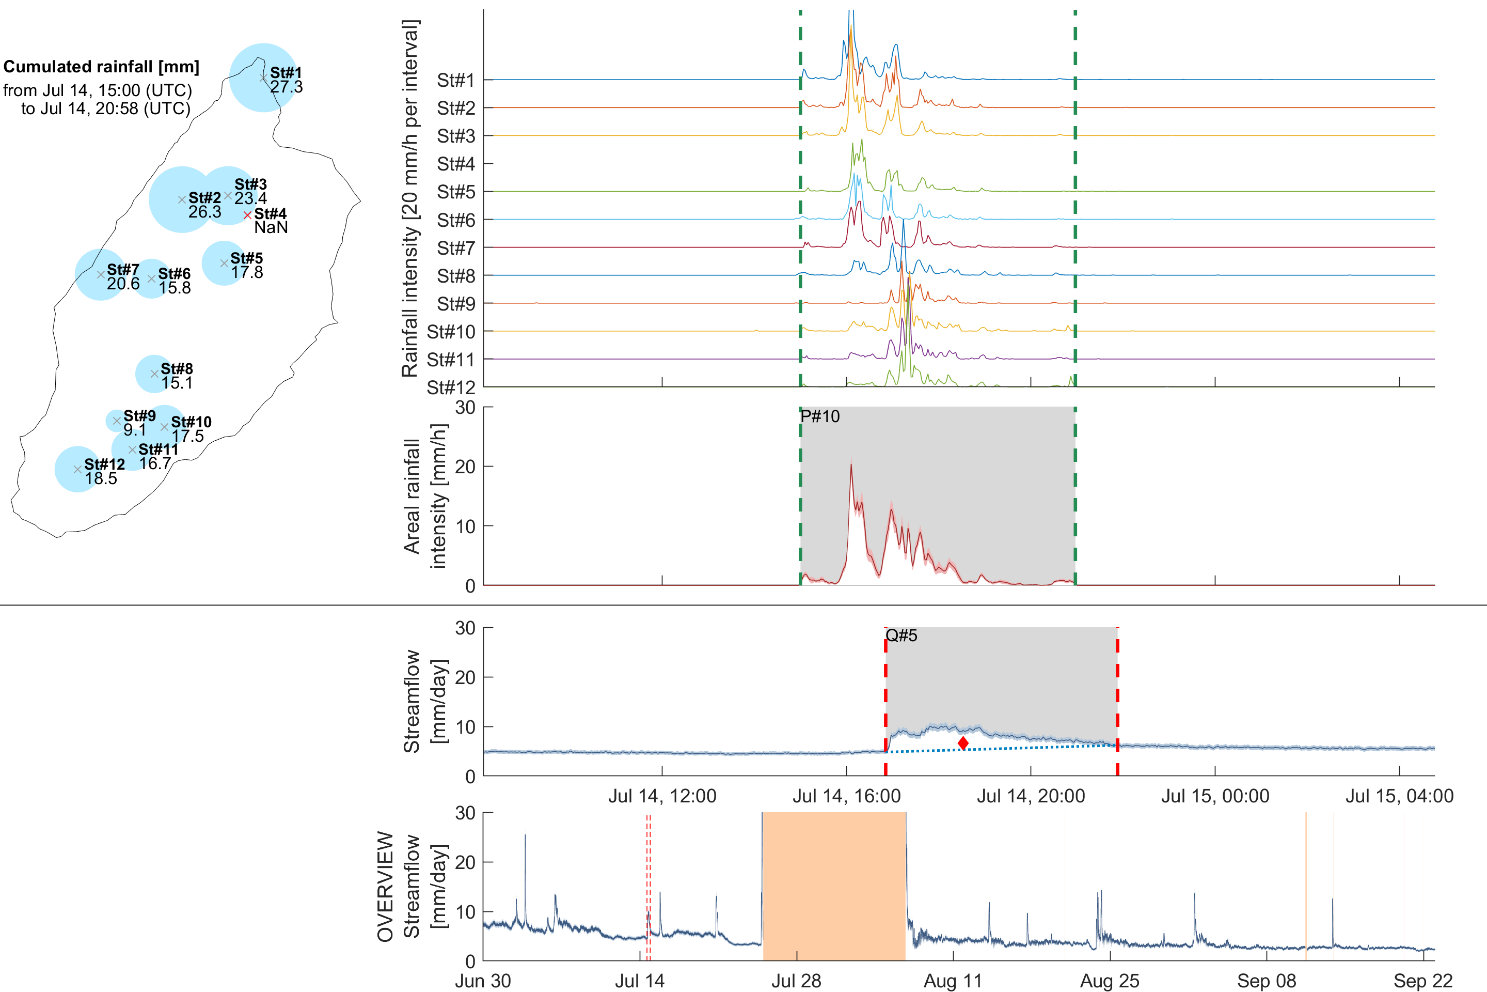


Figure S10. Precipitation event No. 10 from July 14th 03:00 PM to July 14th 08:58 PM
and discharge event No. 5 from July 14th 04:51 PM to July 14th 09:53 PM


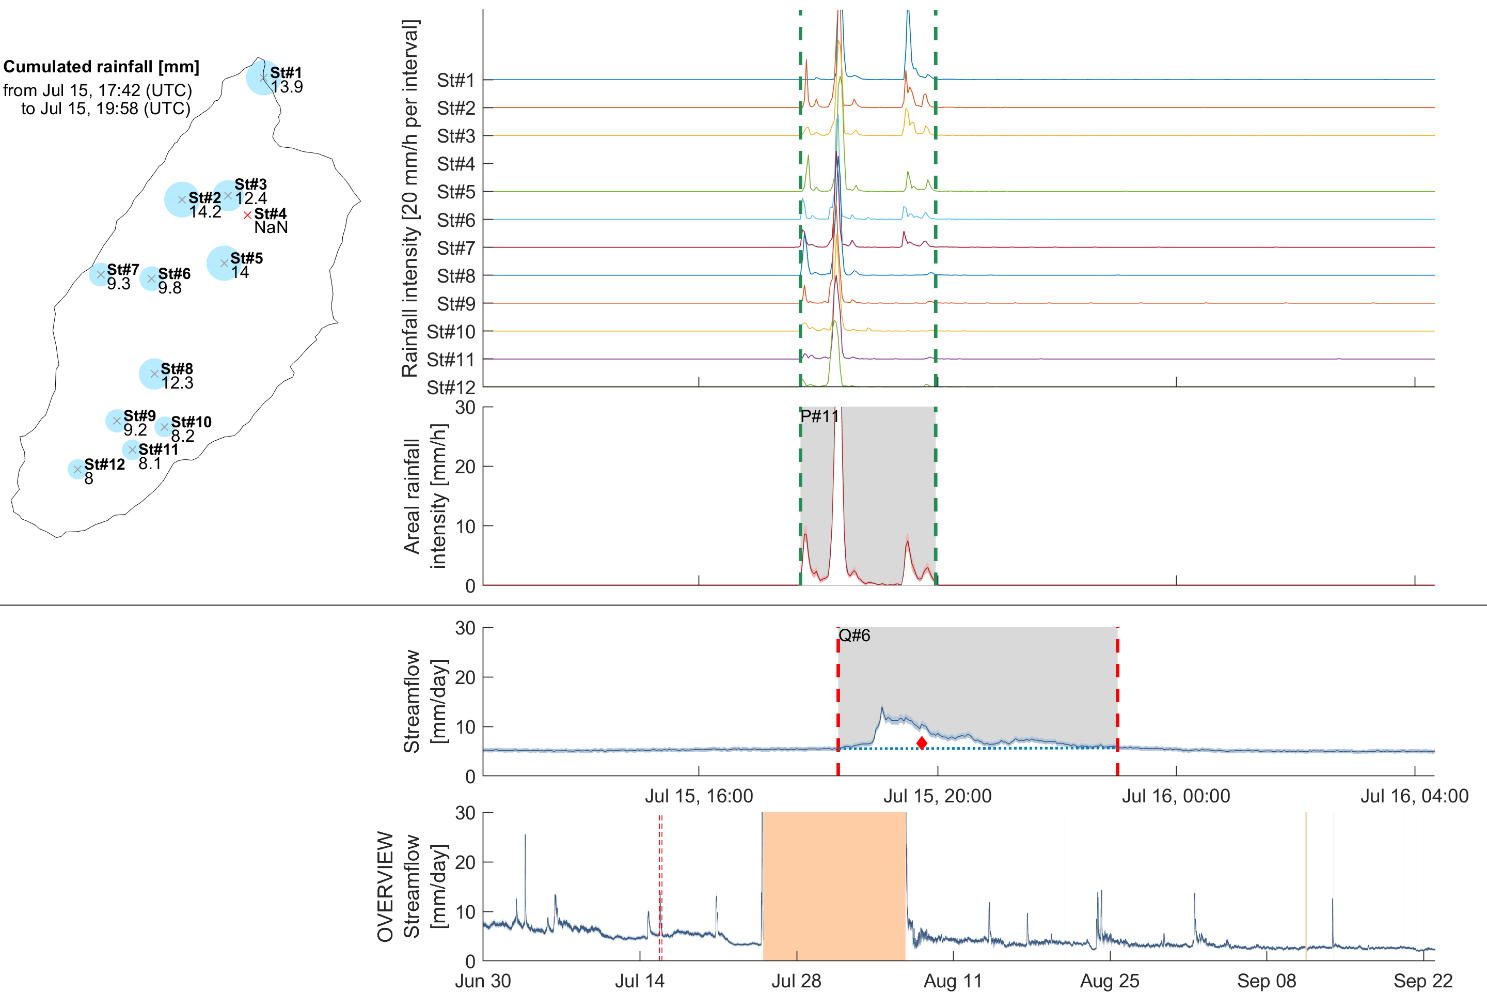


Figure S11. Precipitation event No. 11 from July 15th 05:42 PM to July 15th 07:58 PM
and discharge event No. 6 from July 15th 06:20 PM to July 15th 11:01 PM


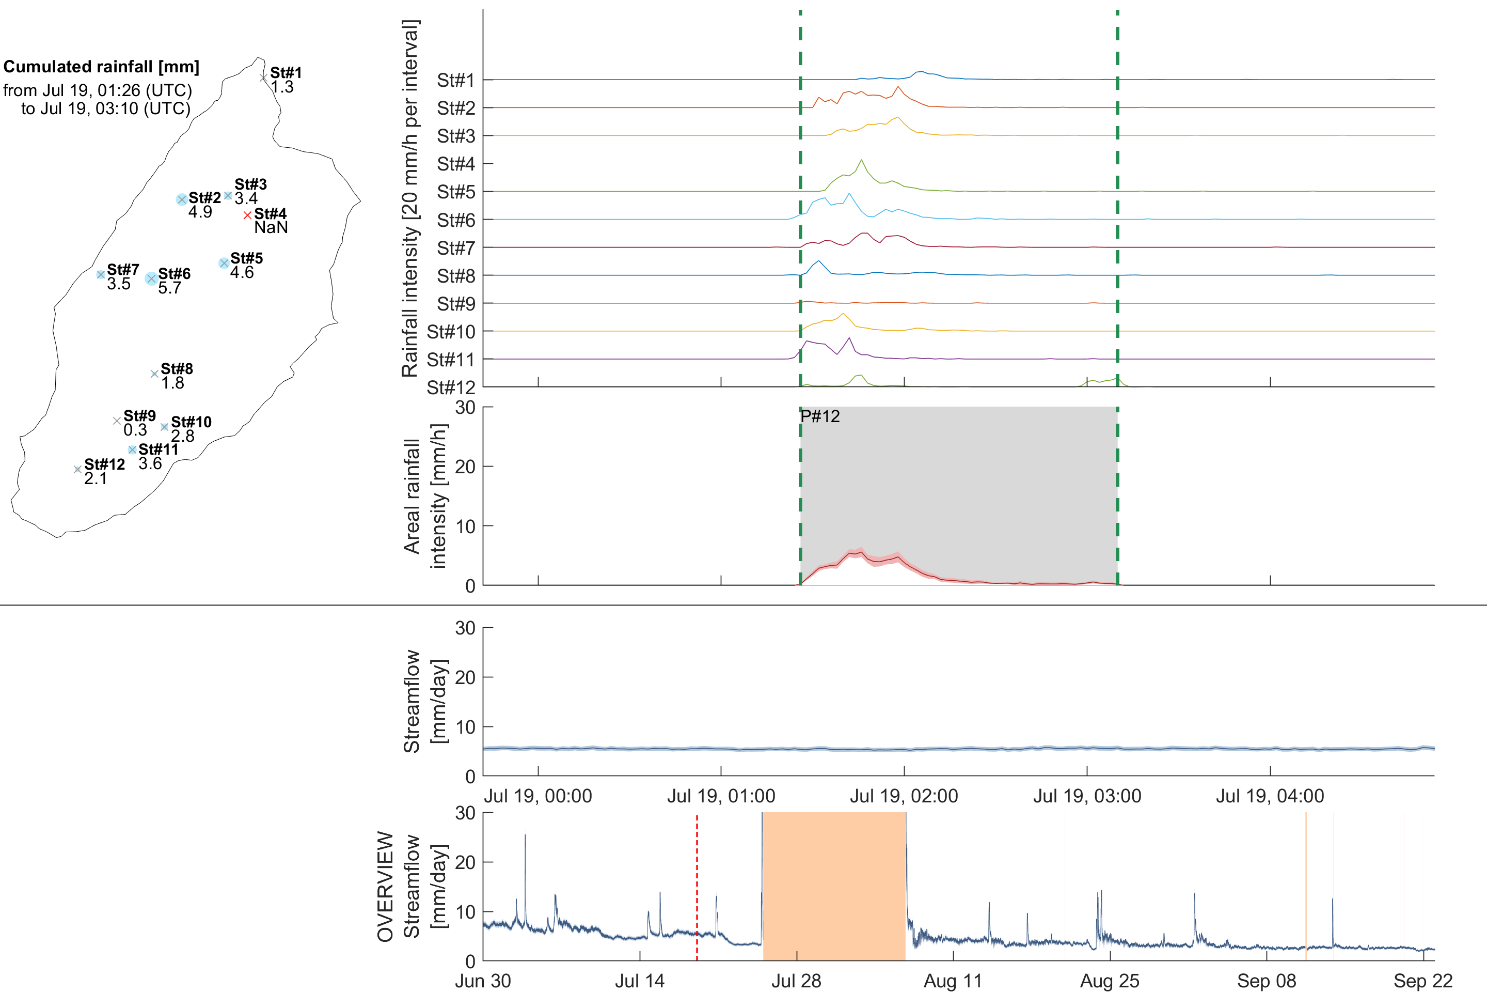


Figure S12. Precipitation event No. 12 from July 19th 01:26 AM to July 19th 03:10 AM


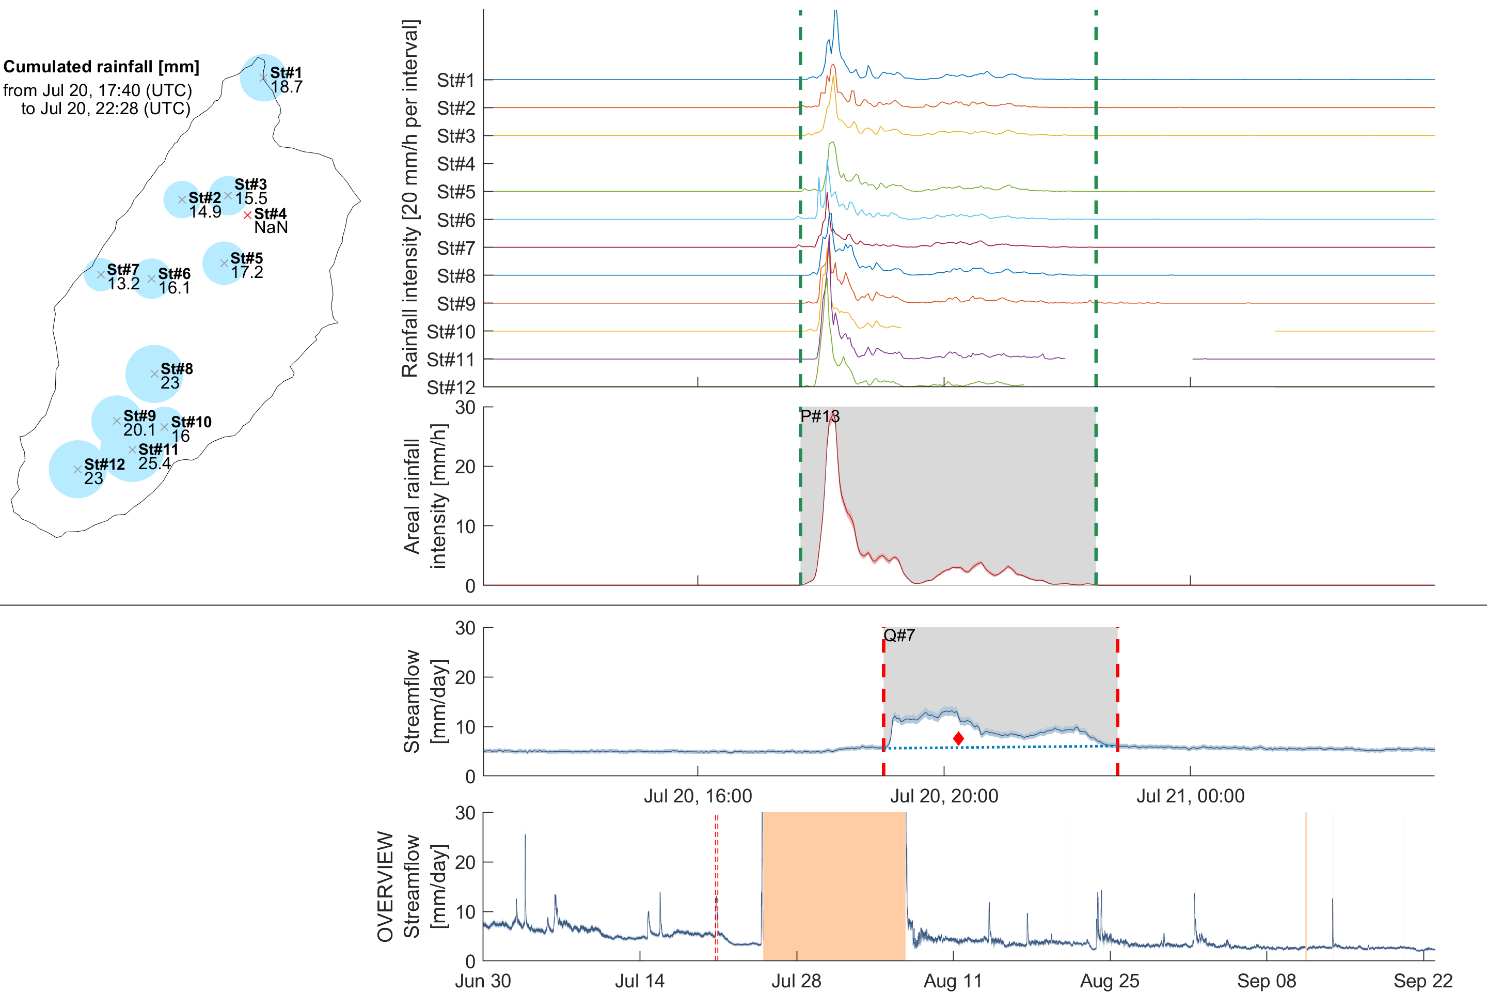


Figure S13. Precipitation event No. 13 from July 20th 05:40 PM to July 20th 10:28 PM
and discharge event No. 7 from July 20th 07:01 PM to July 20th 10:49 PM


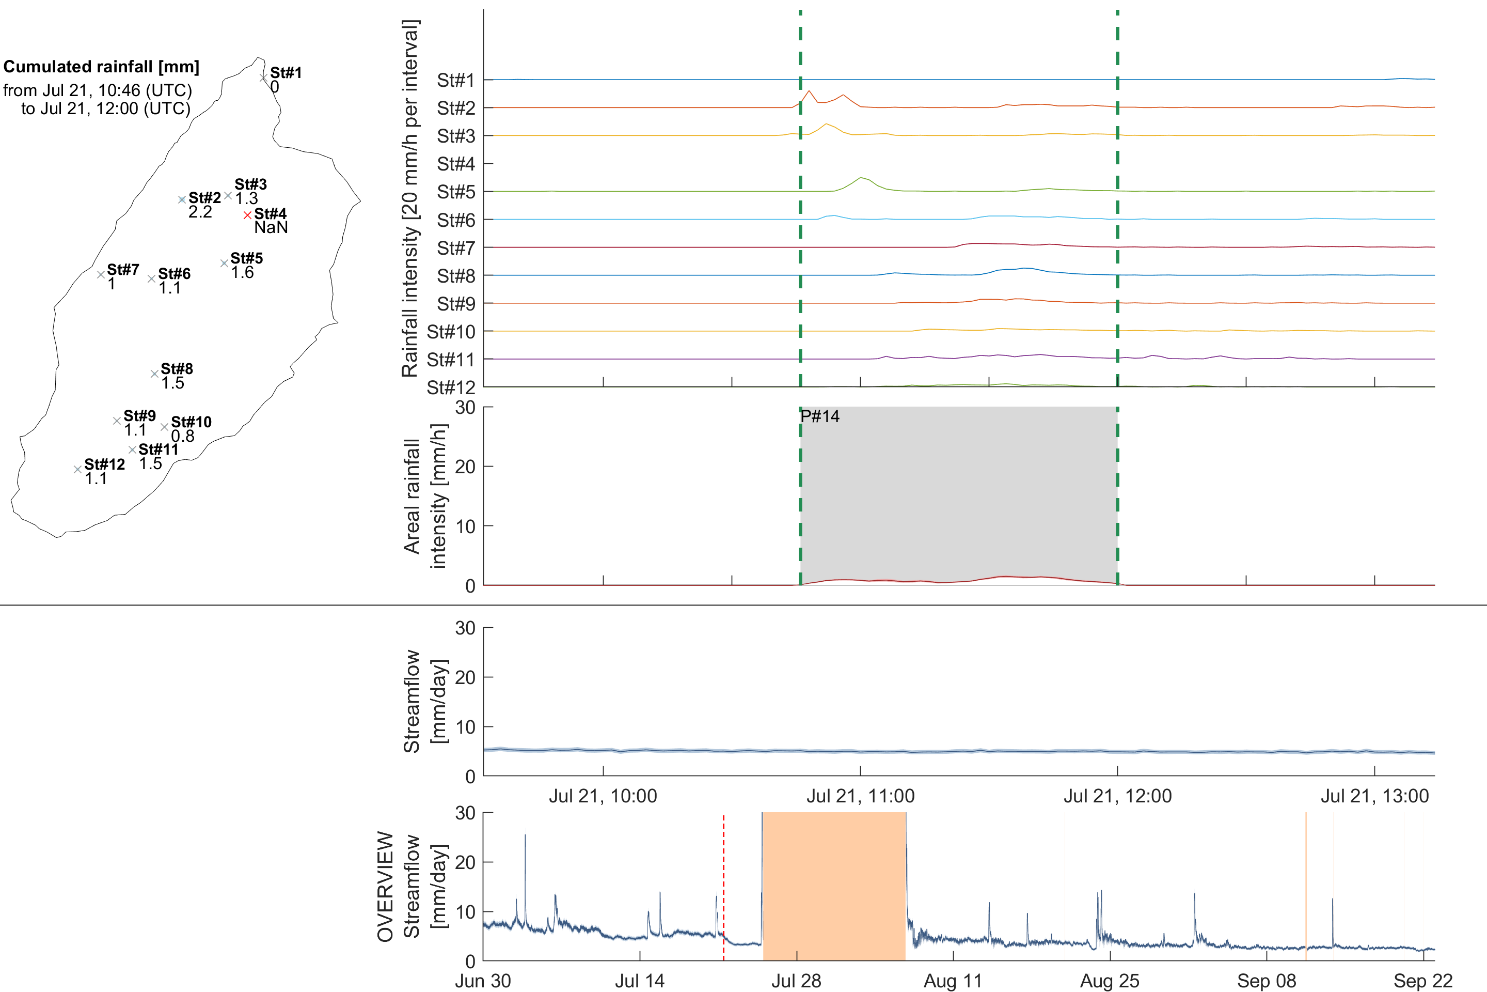


Figure S14. Precipitation event No. 14 from July 21st 10:46 AM to July 21st 12:00 PM


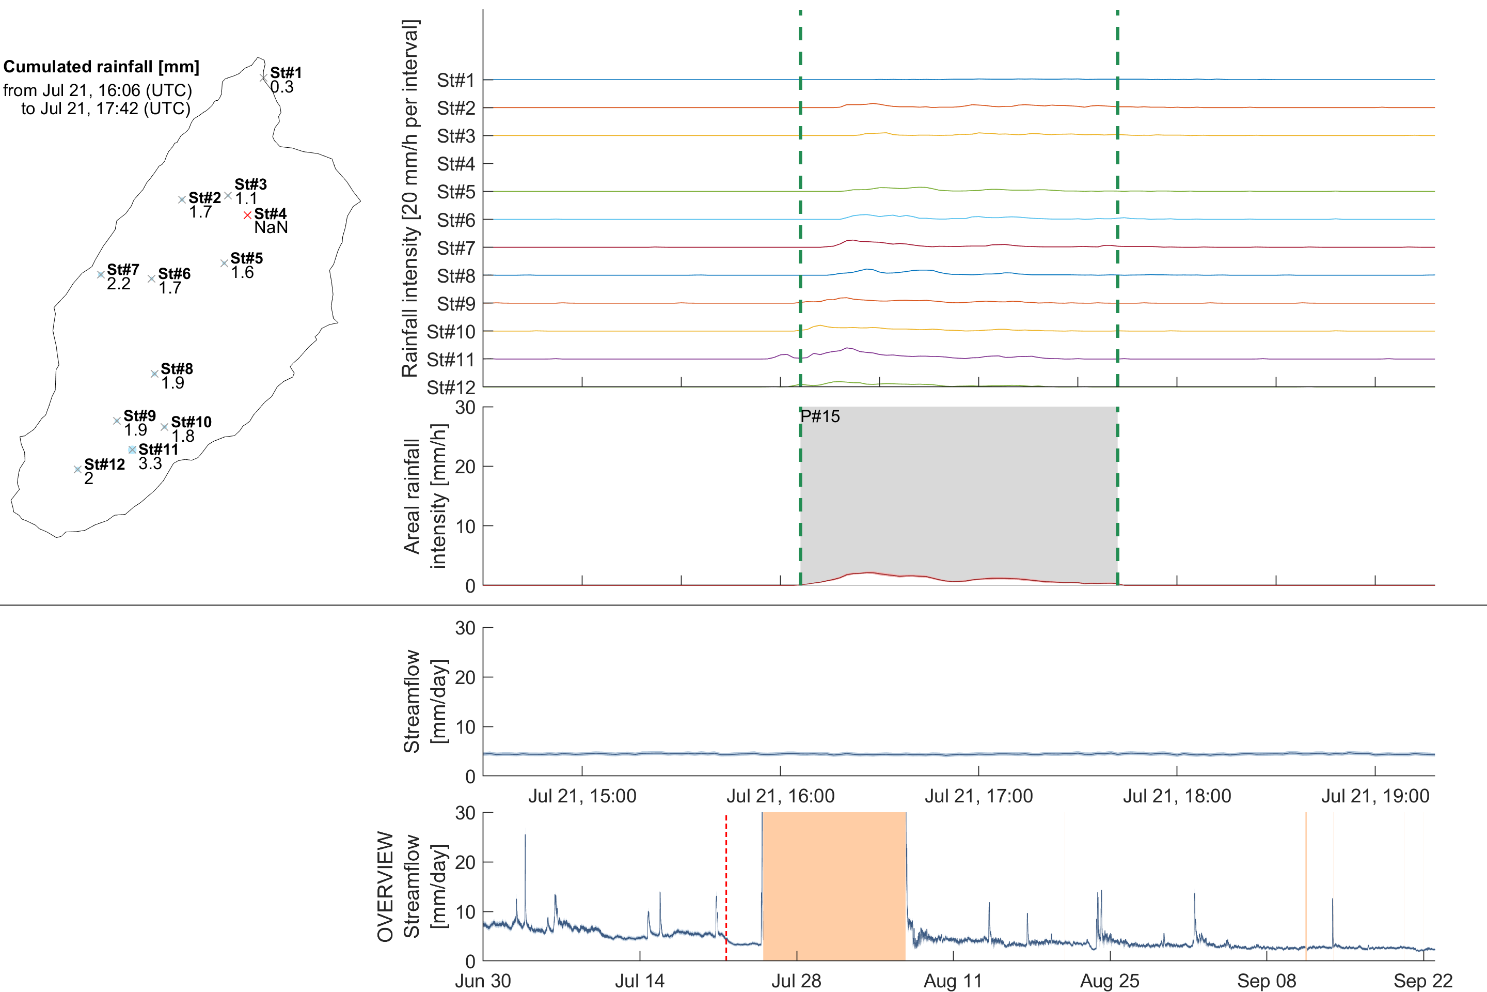


Figure S15. Precipitation event No. 15 from July 21st 04:06 PM to July 21st 05:42 PM


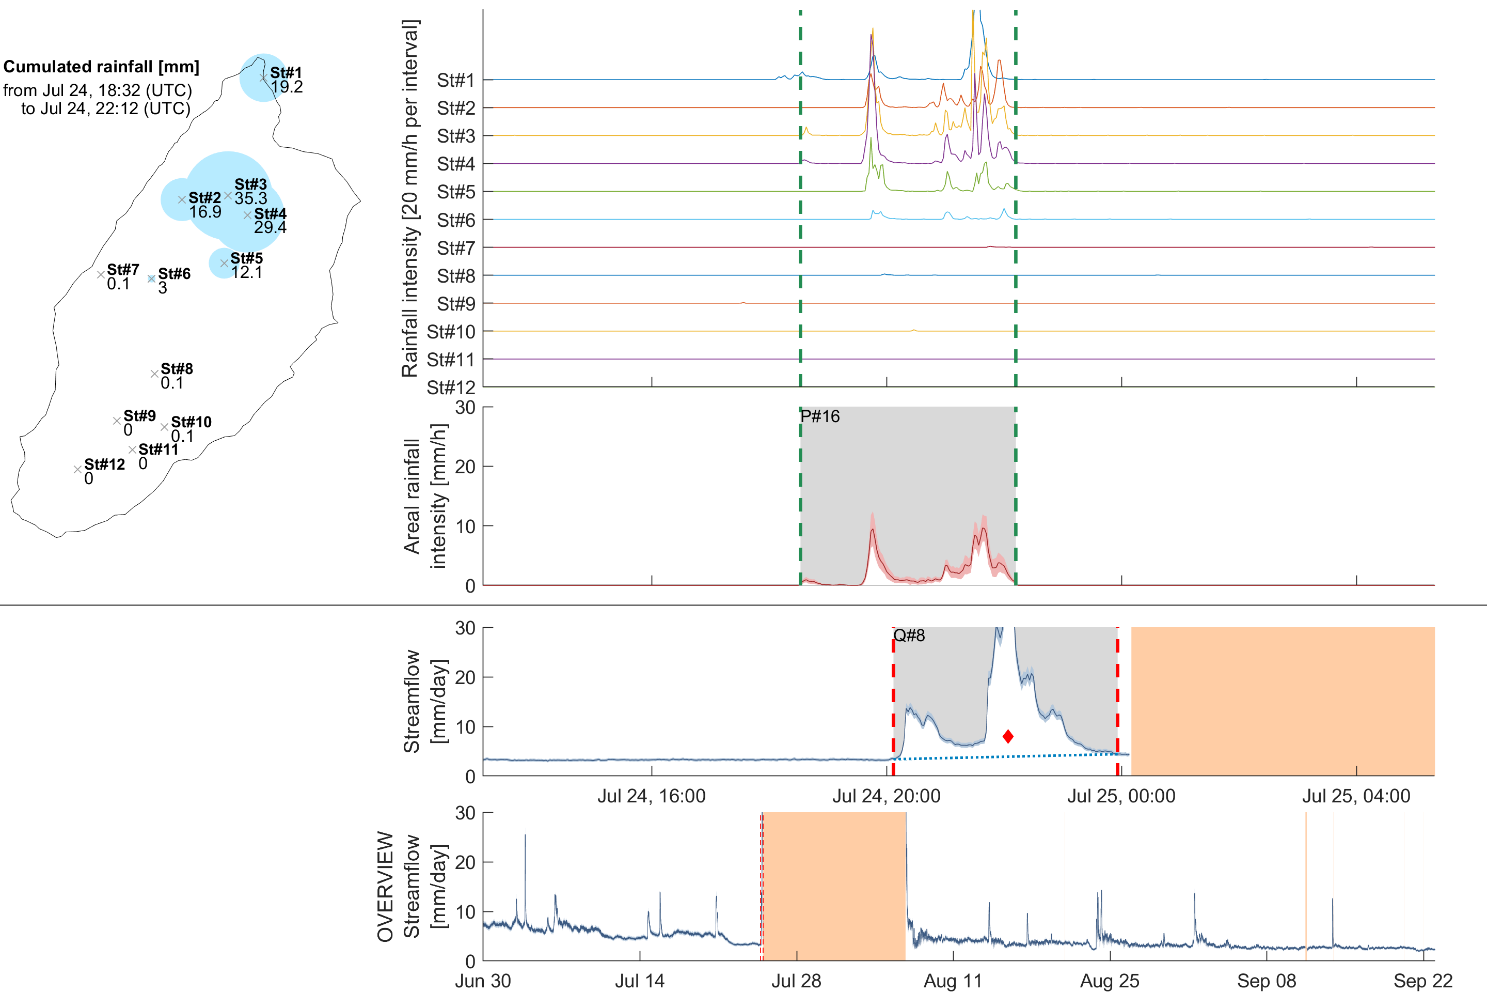


Figure S16. Precipitation event No. 16 from July 24th 06:32 PM to July 24th 10:12 PM
and discharge event No. 8 from July 24th 08:07 PM to July 24th 11:56 PM


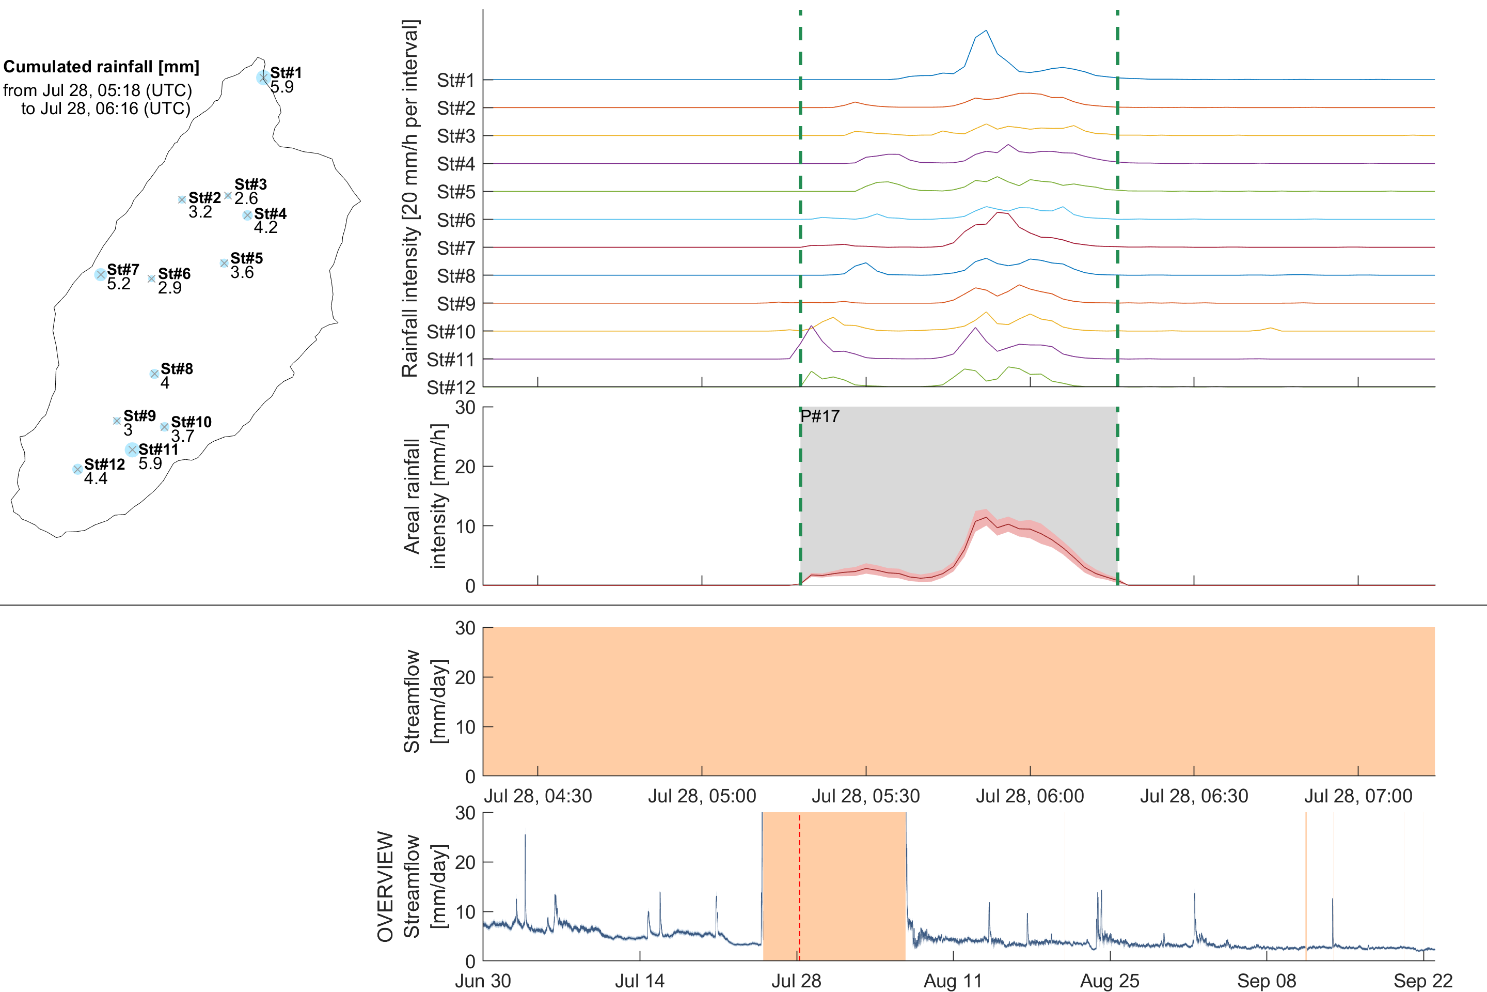


Figure S17. Precipitation event No. 17 from July 28th 05:18 AM to July 28th 06:16 AM


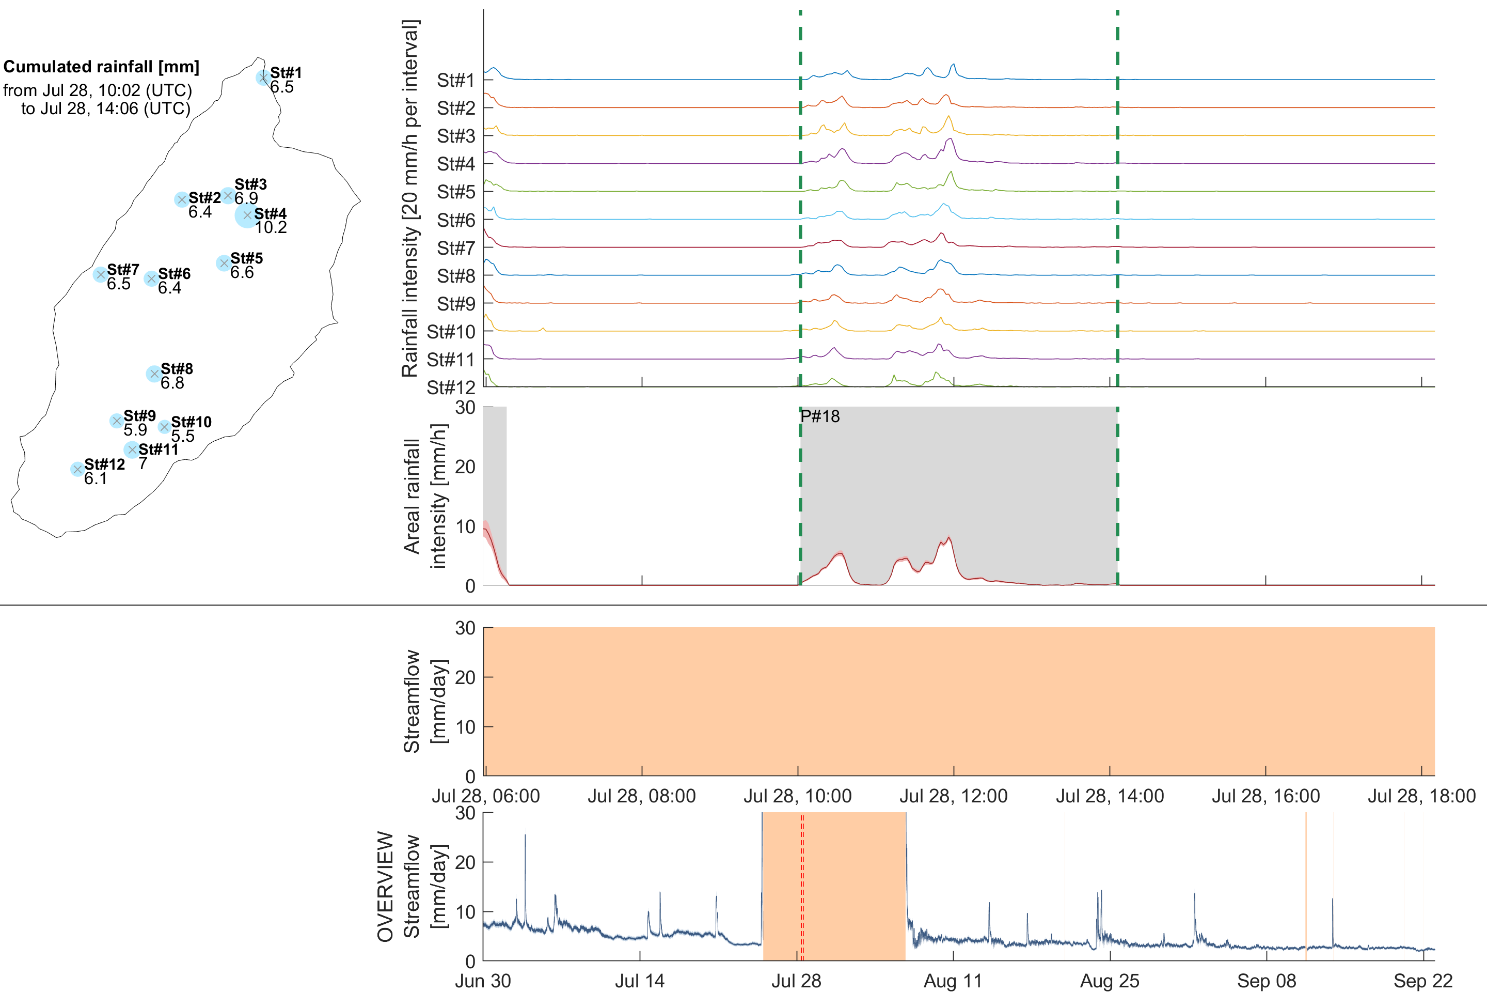


Figure S18. Precipitation event No. 18 from July 28th 10:02 AM to July 28th 02:06 PM


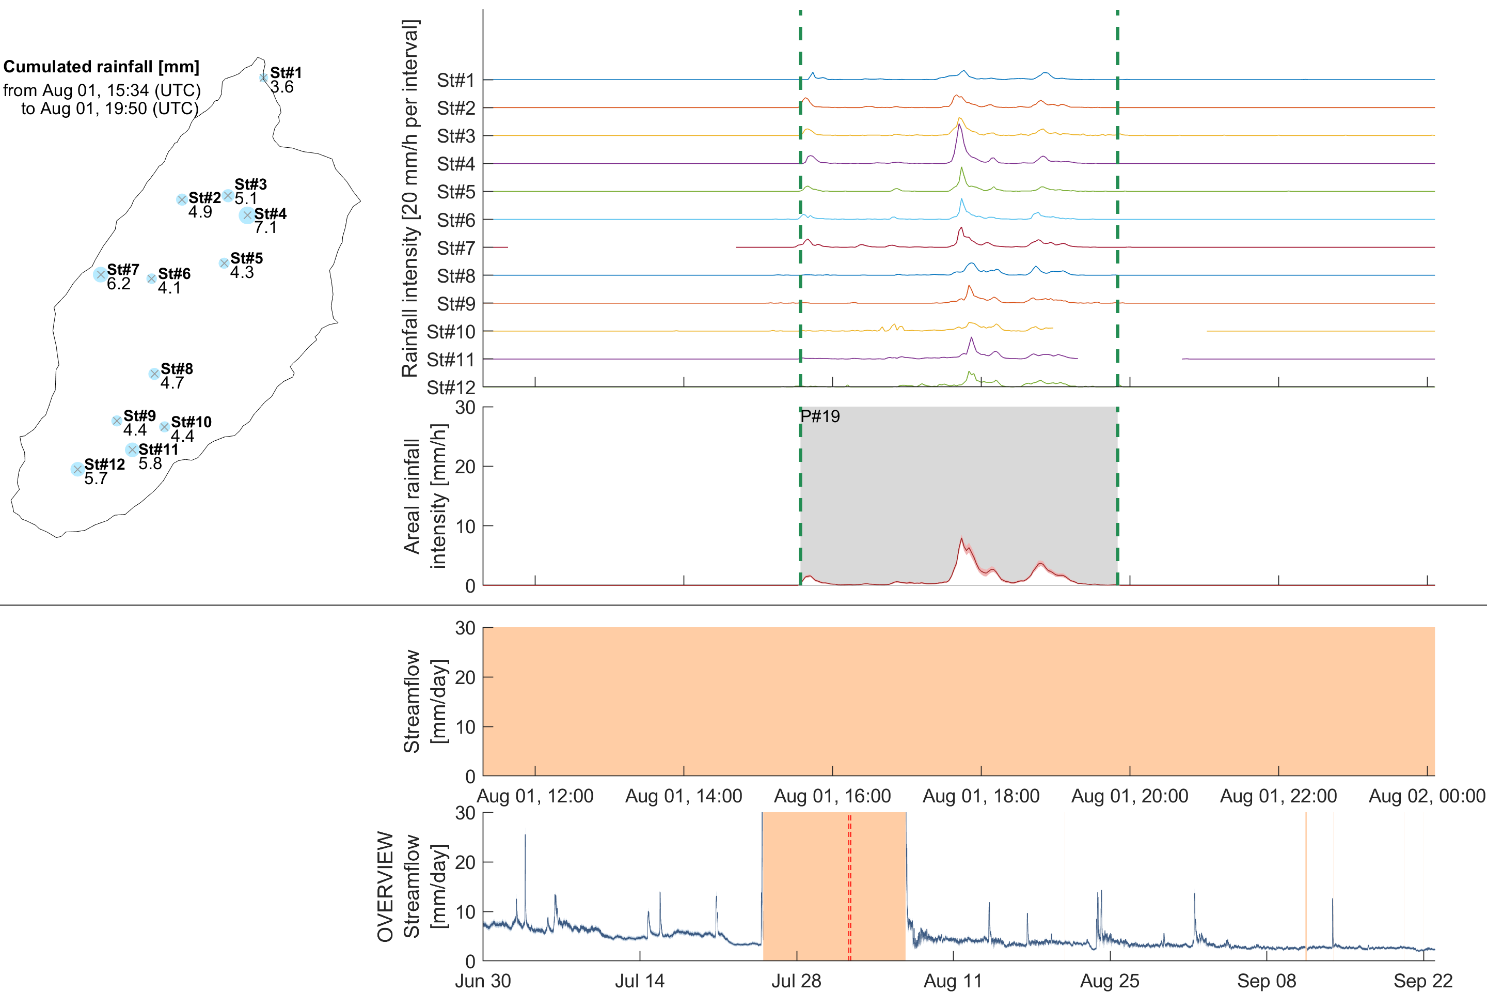


Figure S19. Precipitation event No. 19 from August 1st 03:34 PM to August 1st 07:50 PM


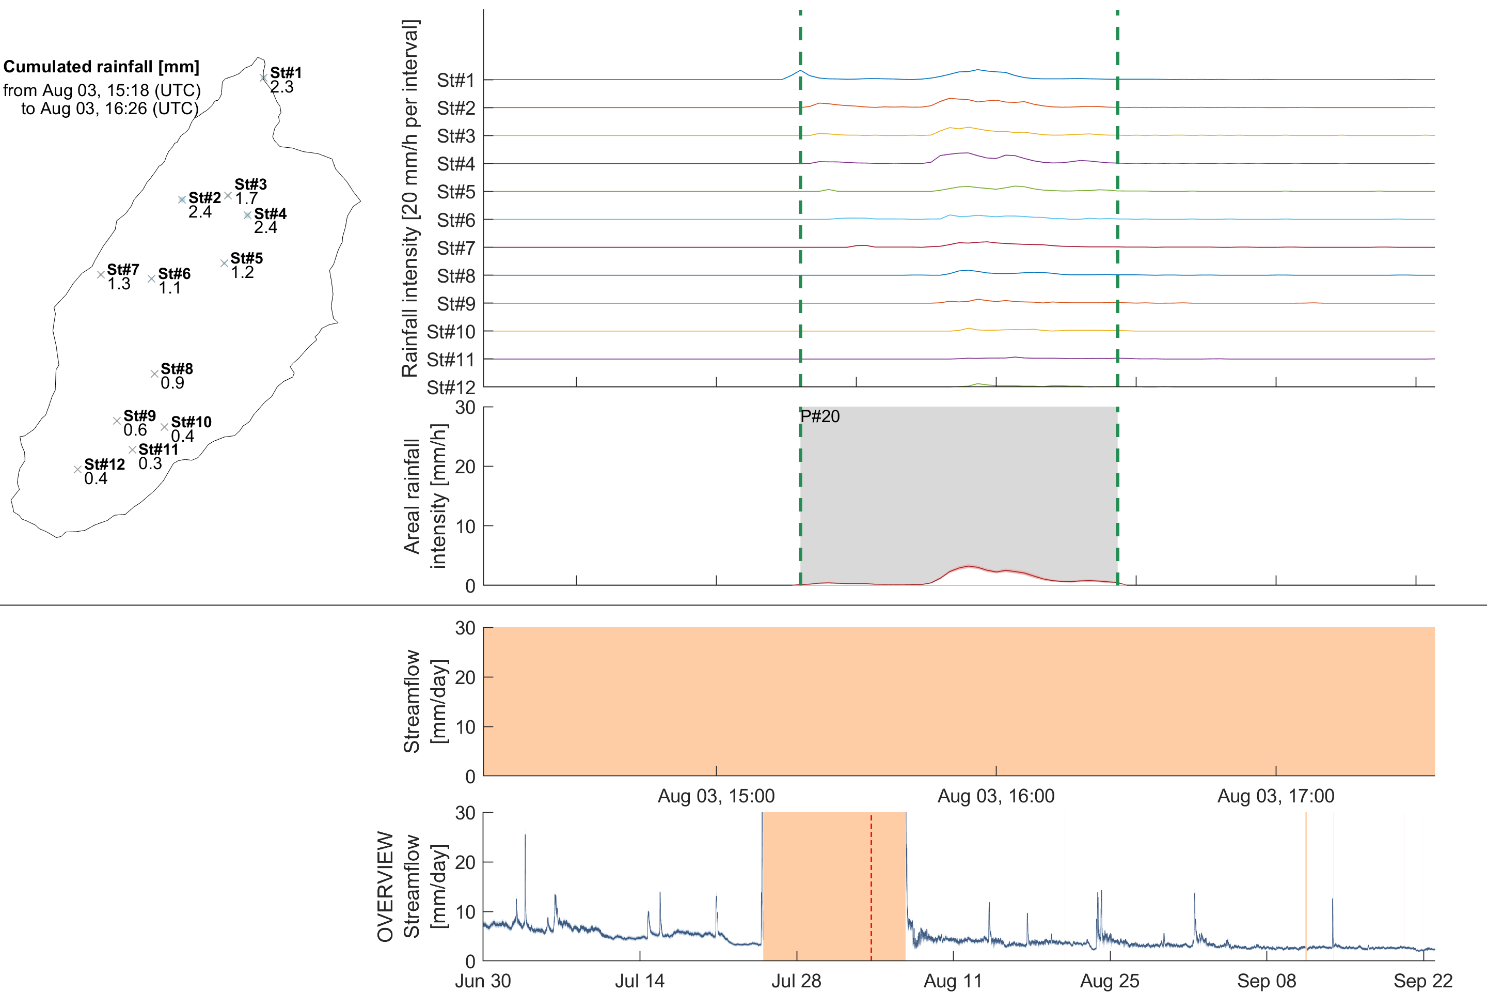


Figure S20. Precipitation event No. 20 from August 3rd 03:18 PM to August 3rd 04:26 PM


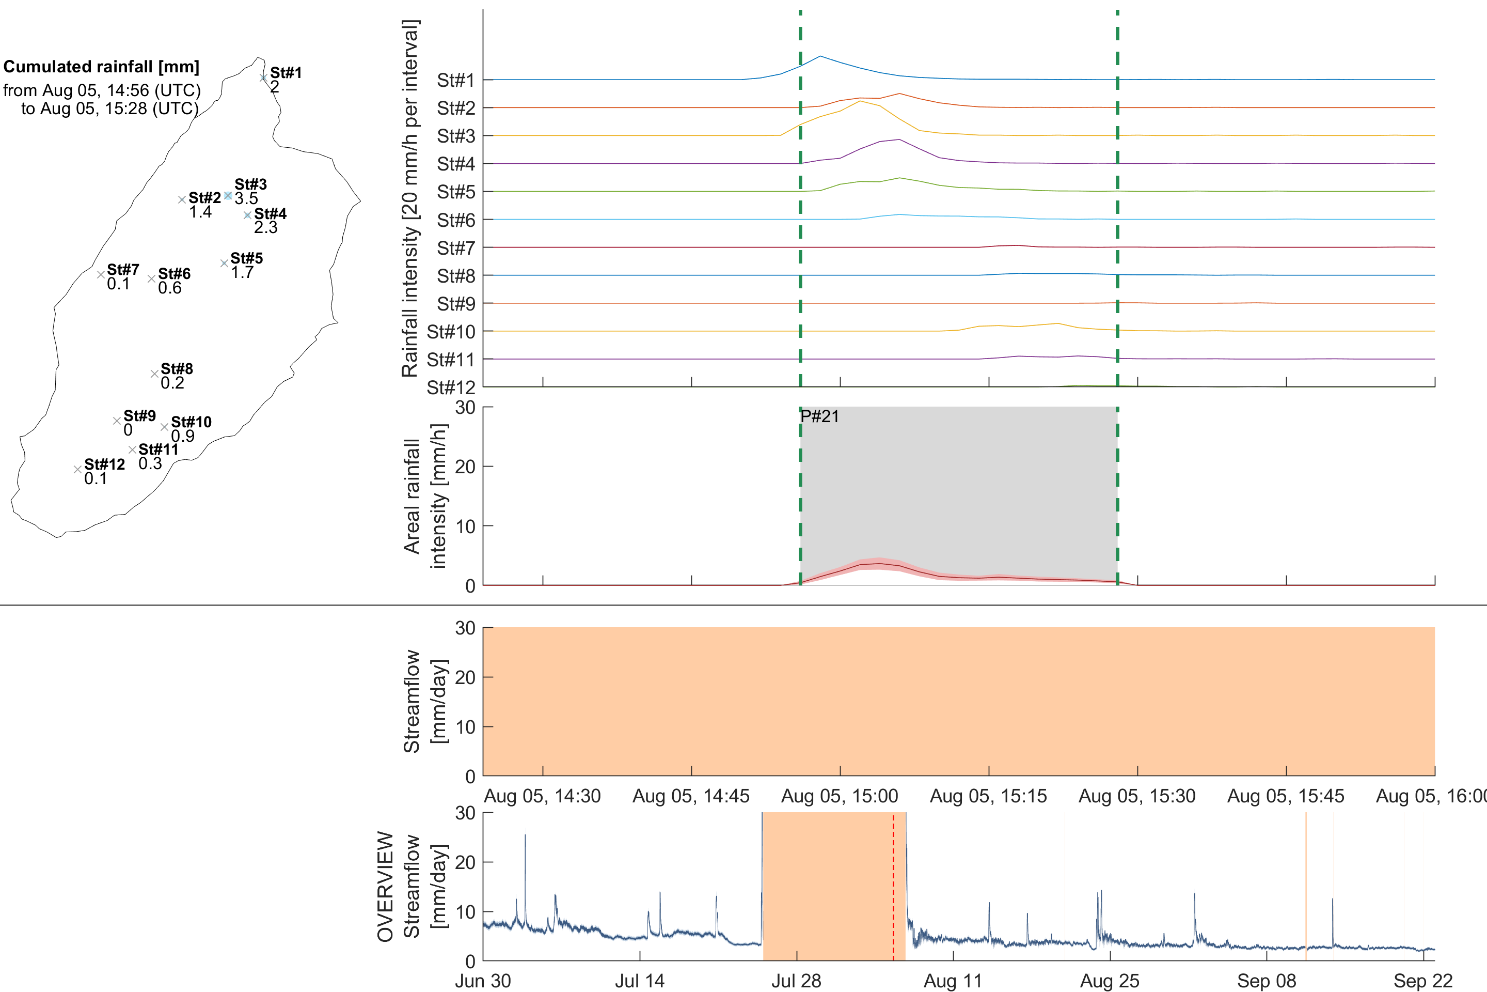


Figure S21. Precipitation event No. 21 from August 5th 02:56 PM to August 5th 03:28 PM


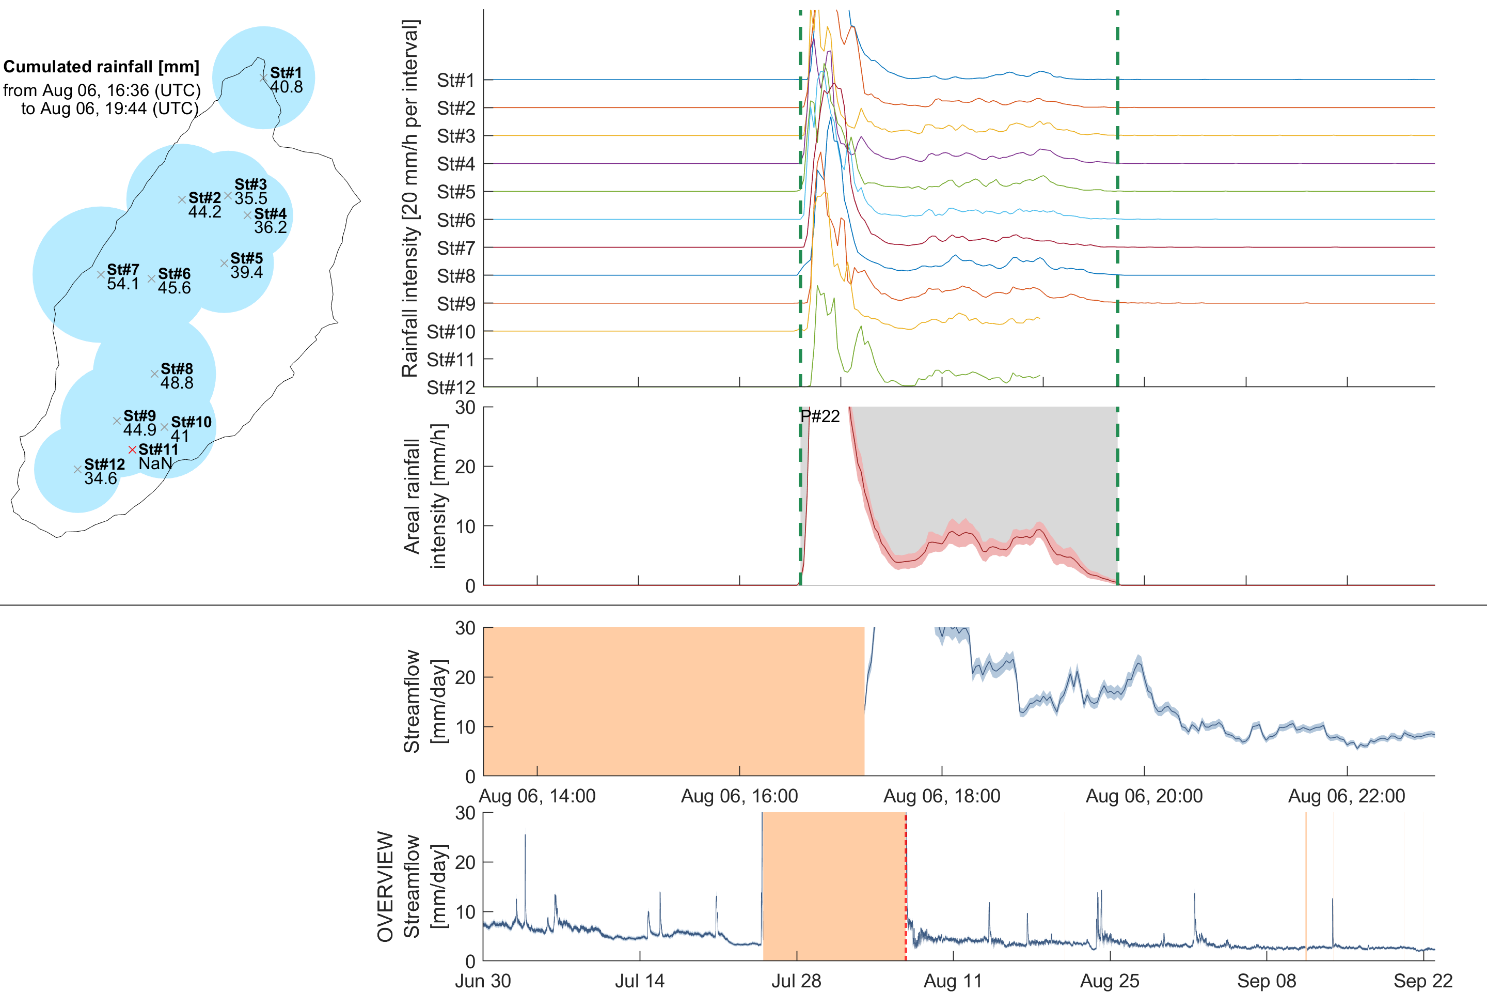


Figure S22. Precipitation event No. 22 from August 6th 04:36 PM to August 6th 07:44 PM


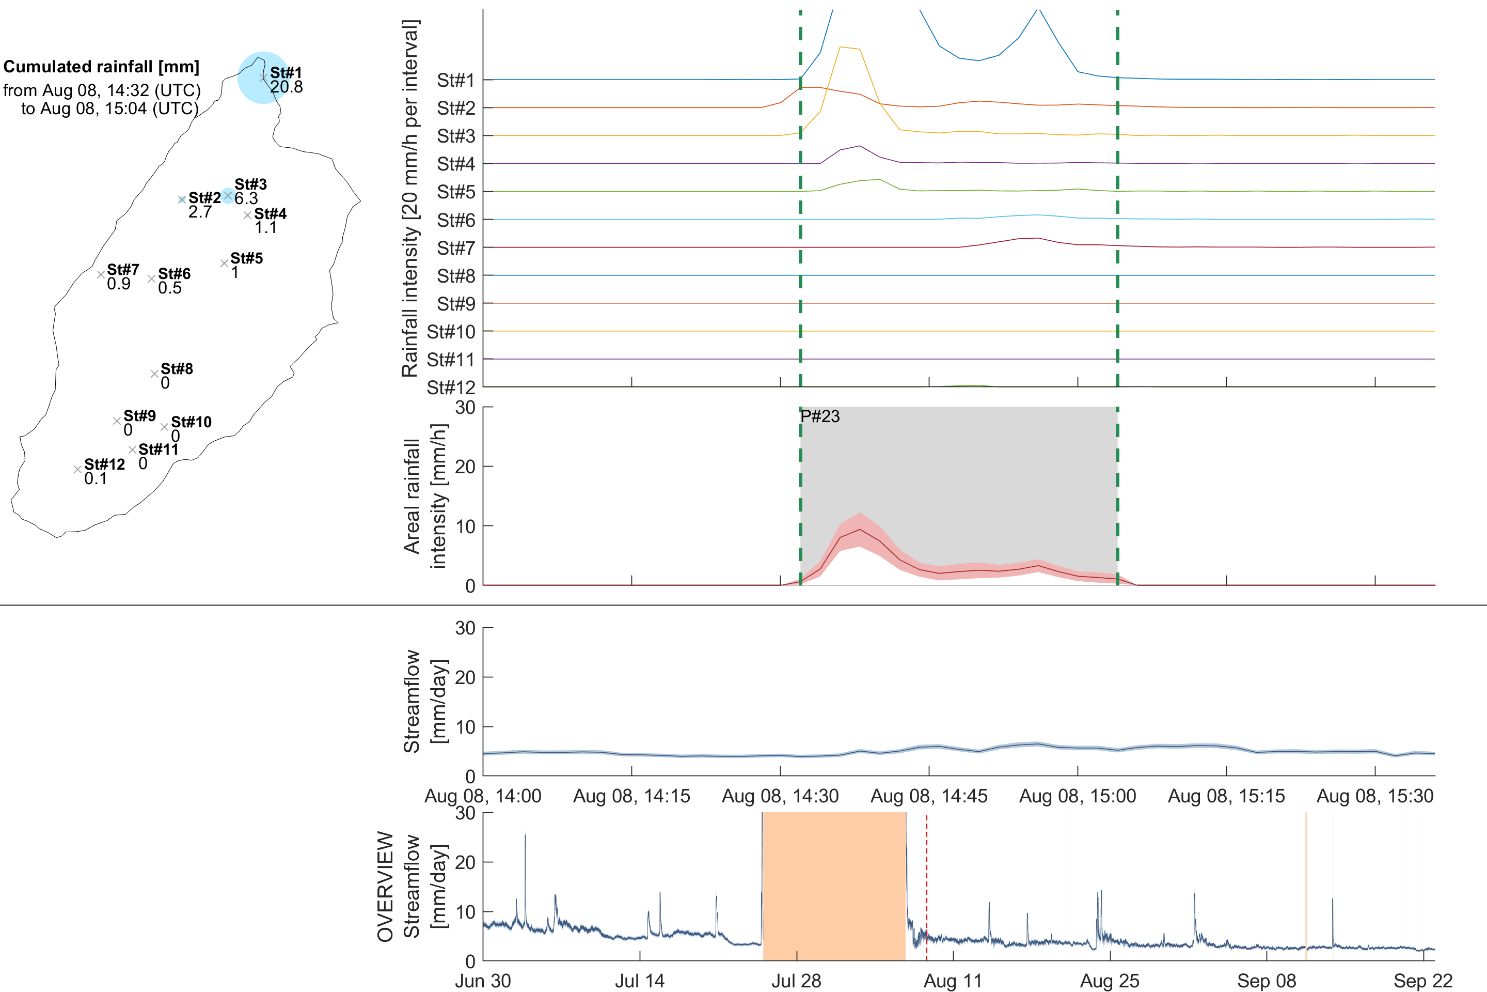


Figure S23. Precipitation event No. 23 from August 8th 02:32 PM to August 8th 03:04 PM


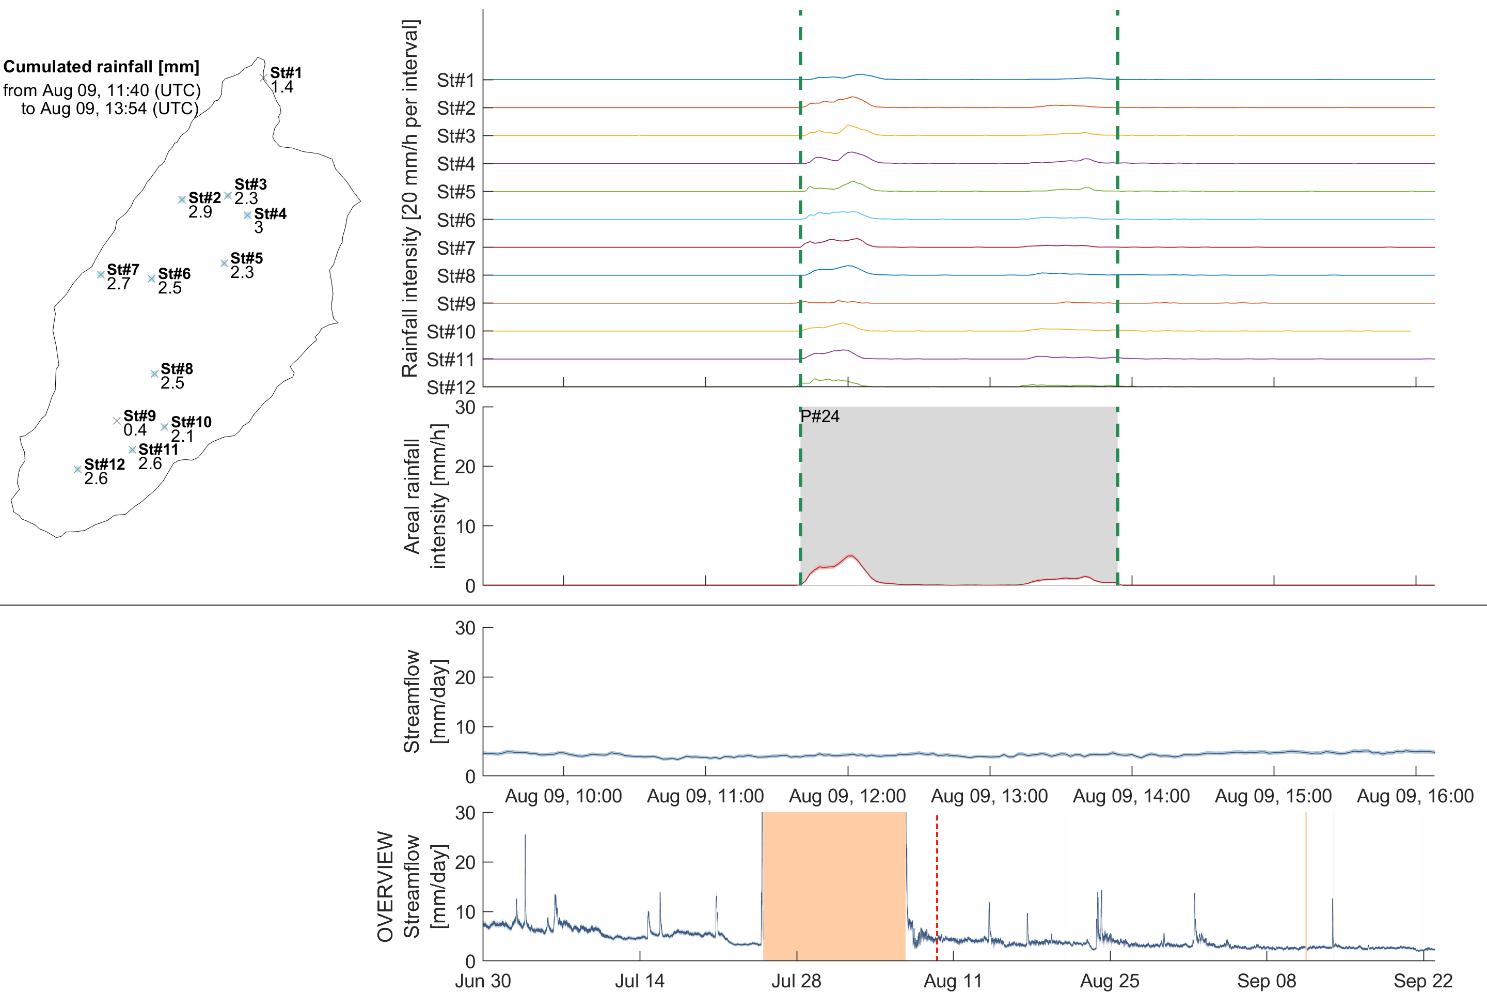


Figure S24. Precipitation event No. 24 from August 9th 11:40 AM to August 9th 01:54 PM


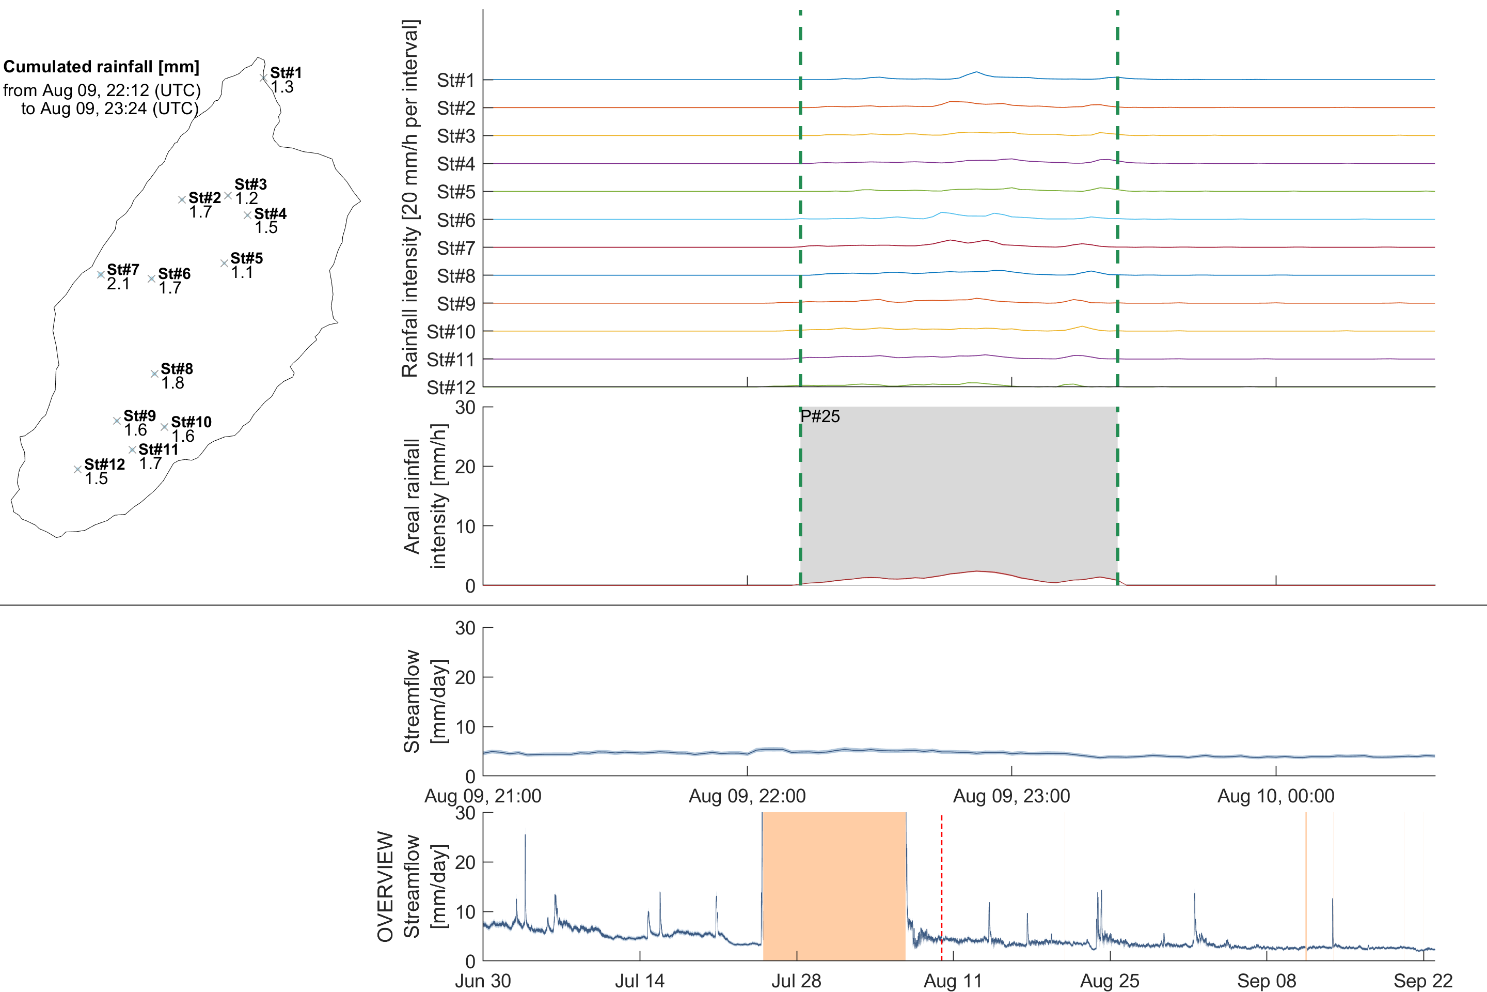


Figure S25. Precipitation event No. 25 from August 9th 10:12 PM to August 9th 11:24 PM


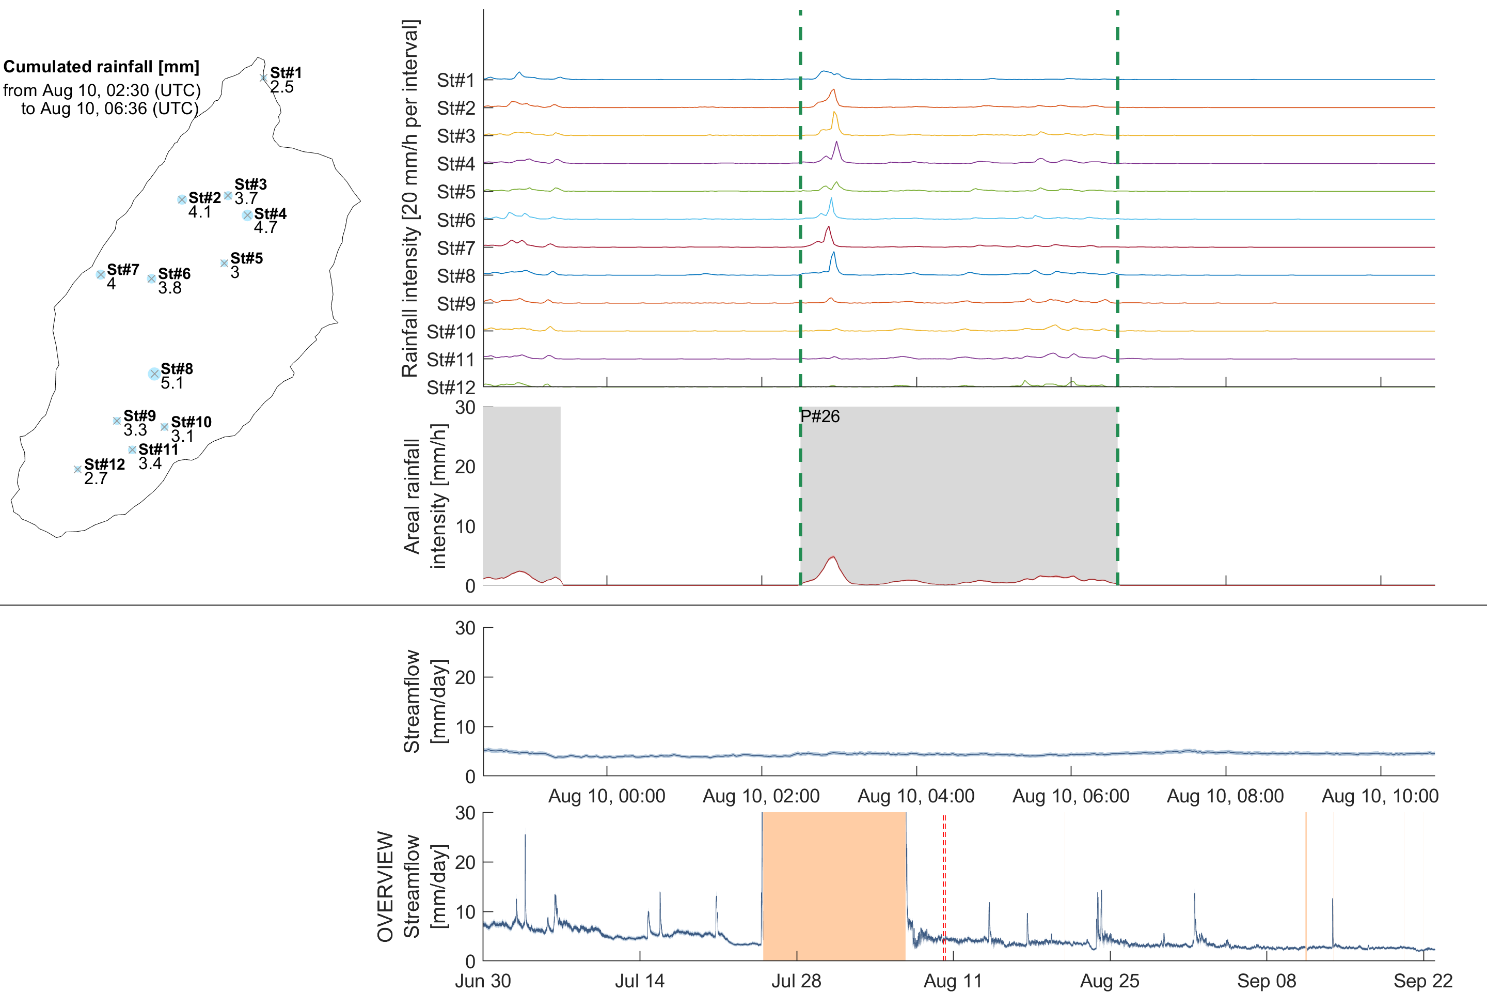


Figure S26. Precipitation event No. 26 from August 10th 02:30 AM to August 10th 06:36 AM


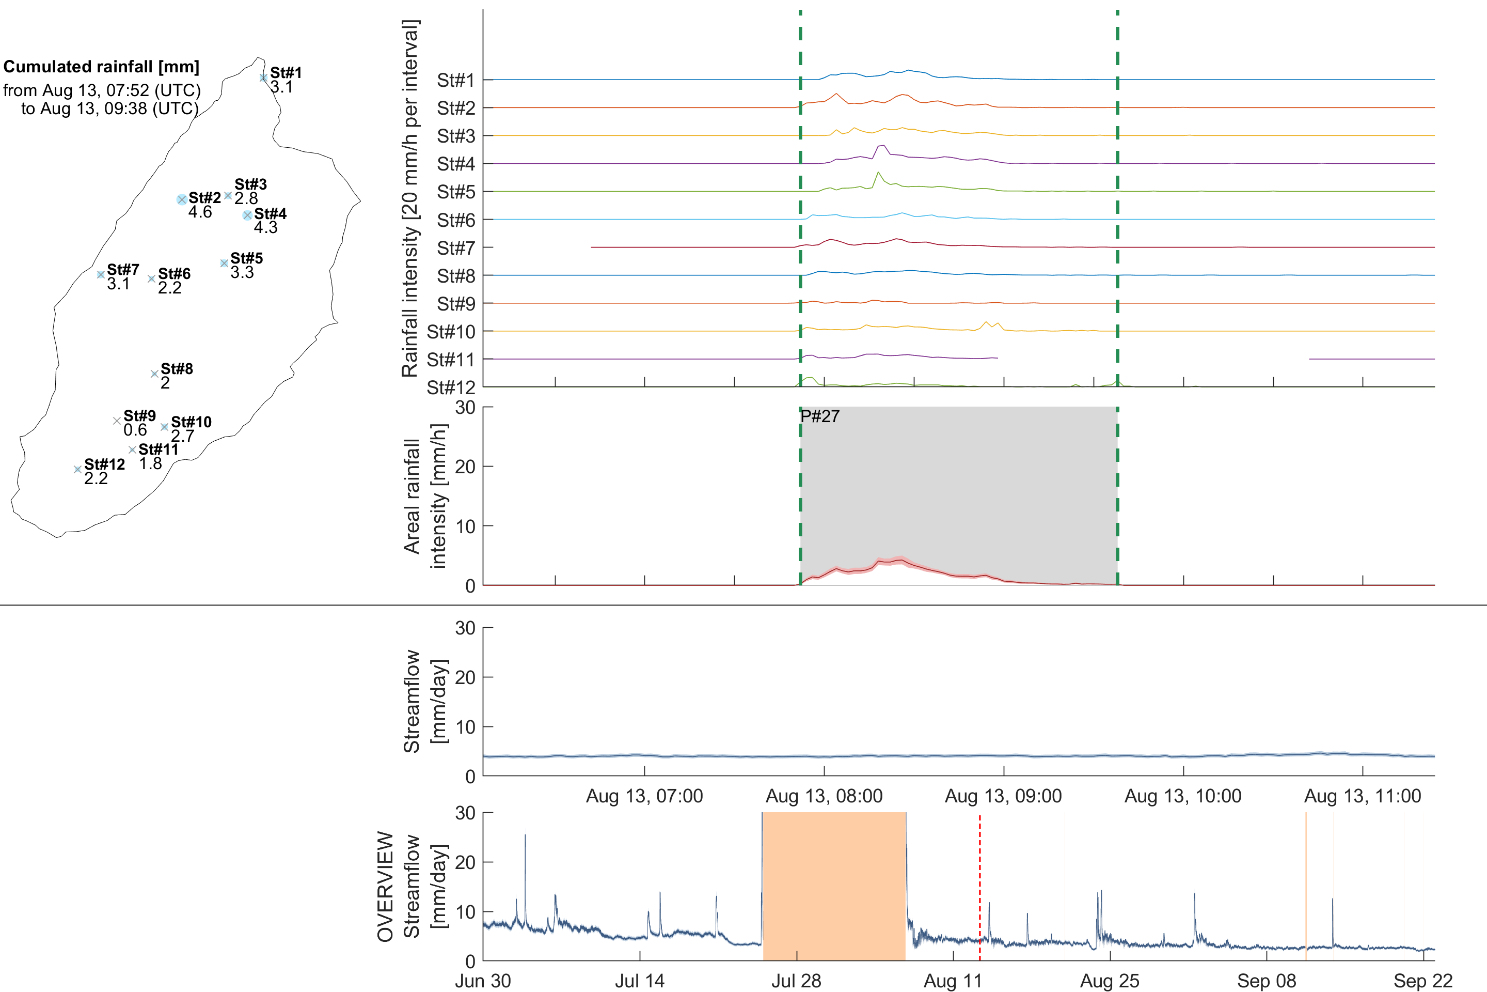


Figure S27. Precipitation event No. 27 from August 13th 07:52 AM to August 13th 09:38 AM


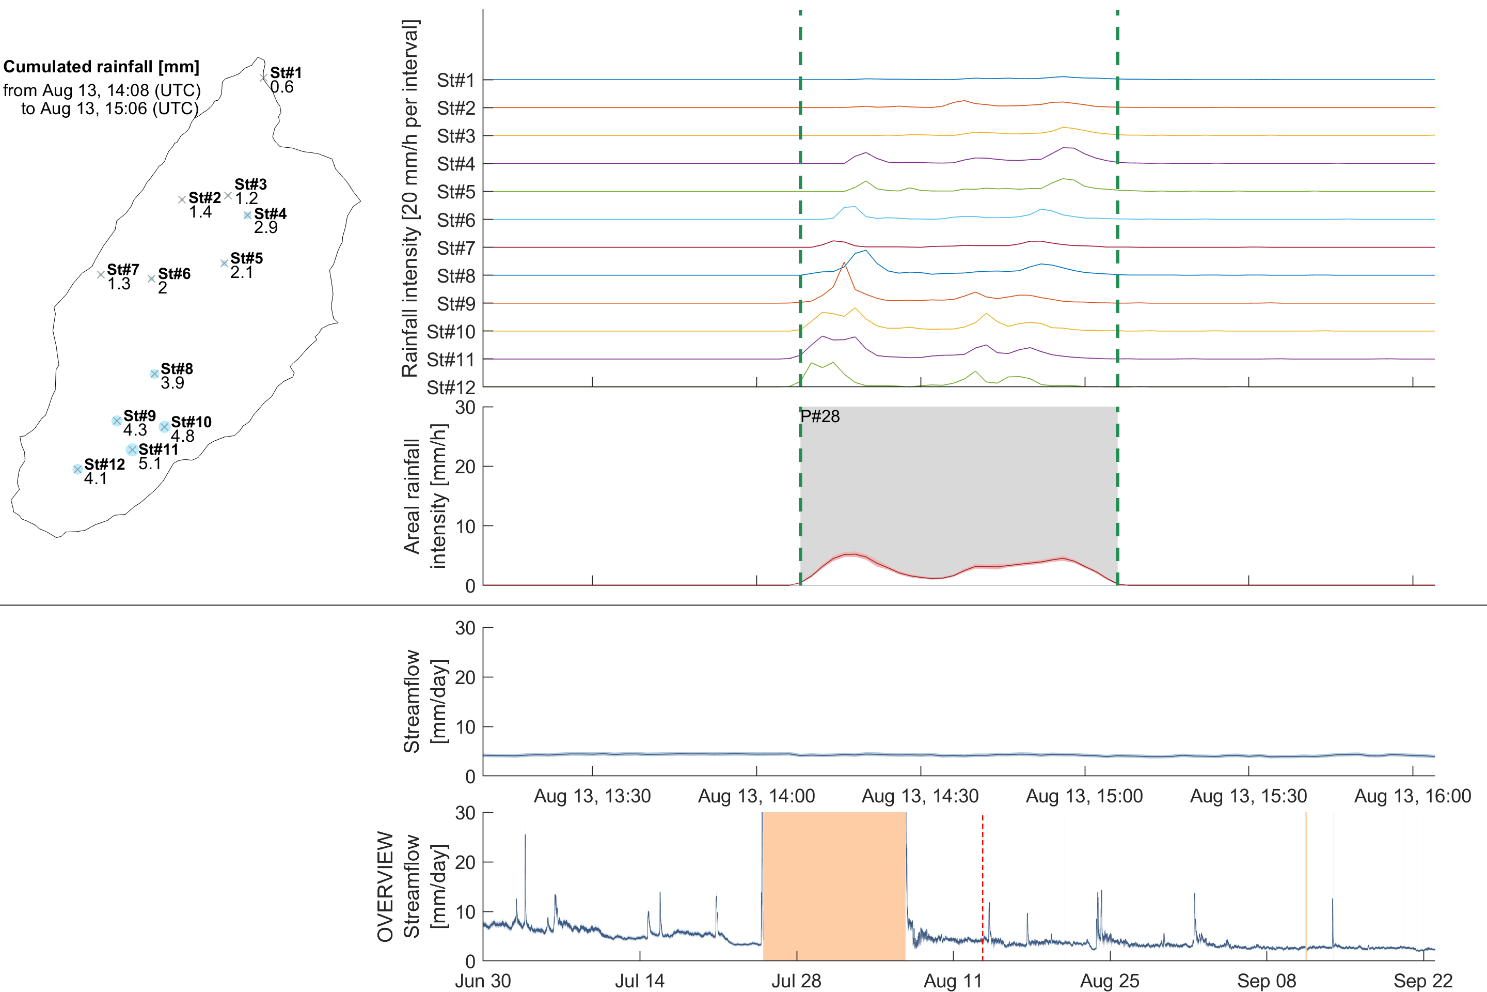


Figure S28. Precipitation event No. 28 from August 13th 02:08 PM to August 13th 03:06 PM


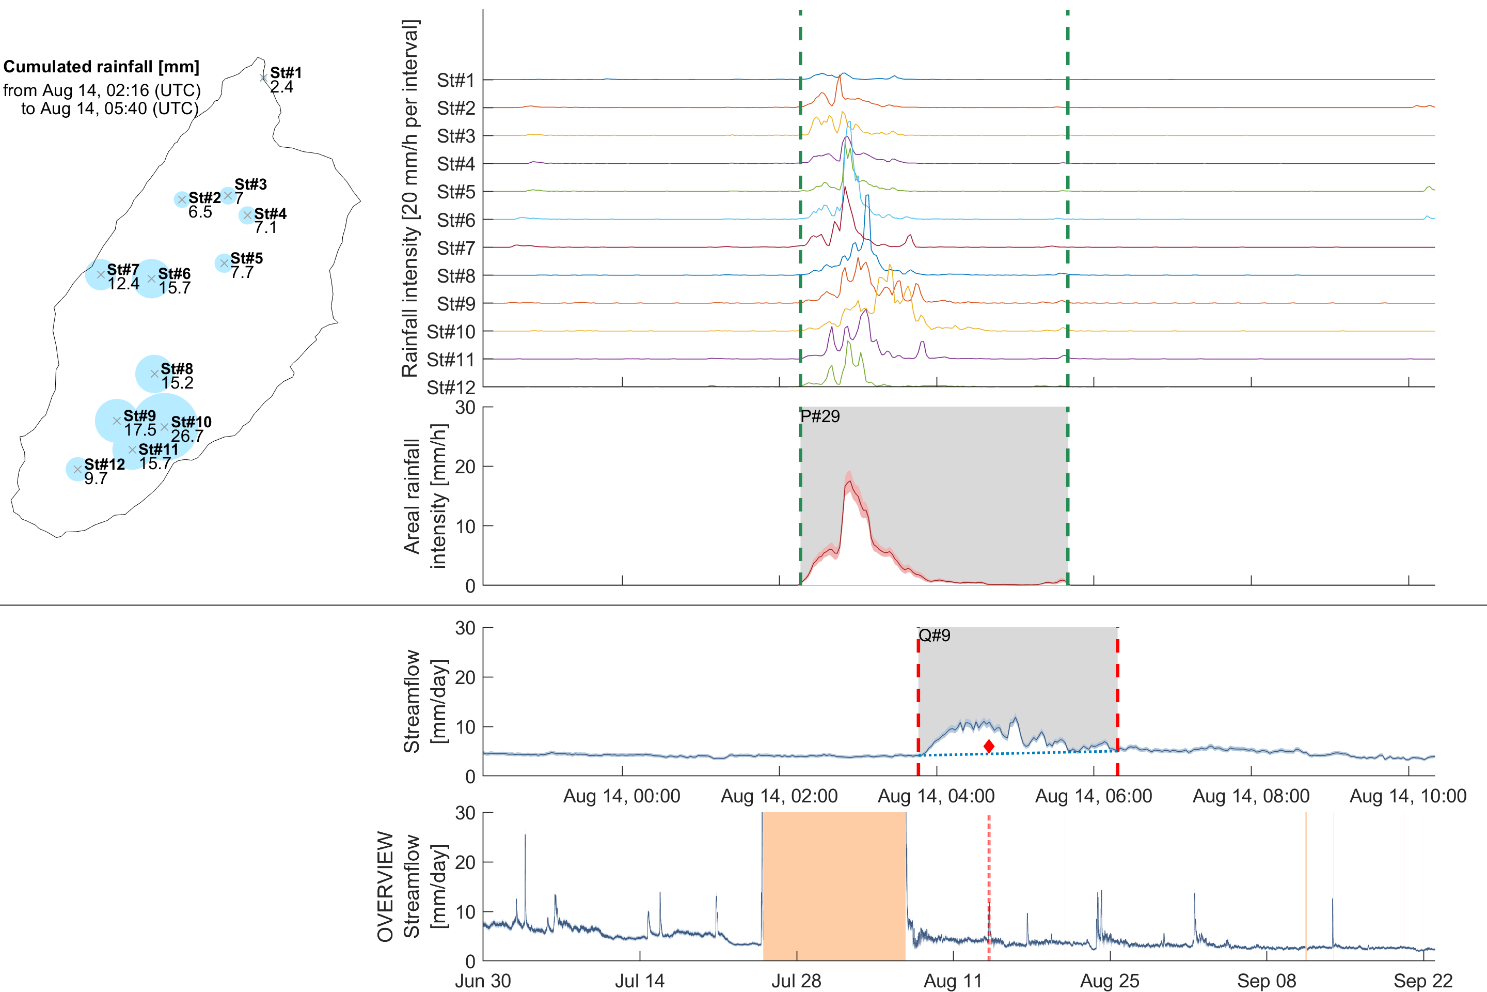


Figure S29. Precipitation event No. 29 from August 14th 02:16 AM to August 14th 05:40 AM
and discharge event No. 9 from August 14th 03:46 AM to August 14th 06:18 AM


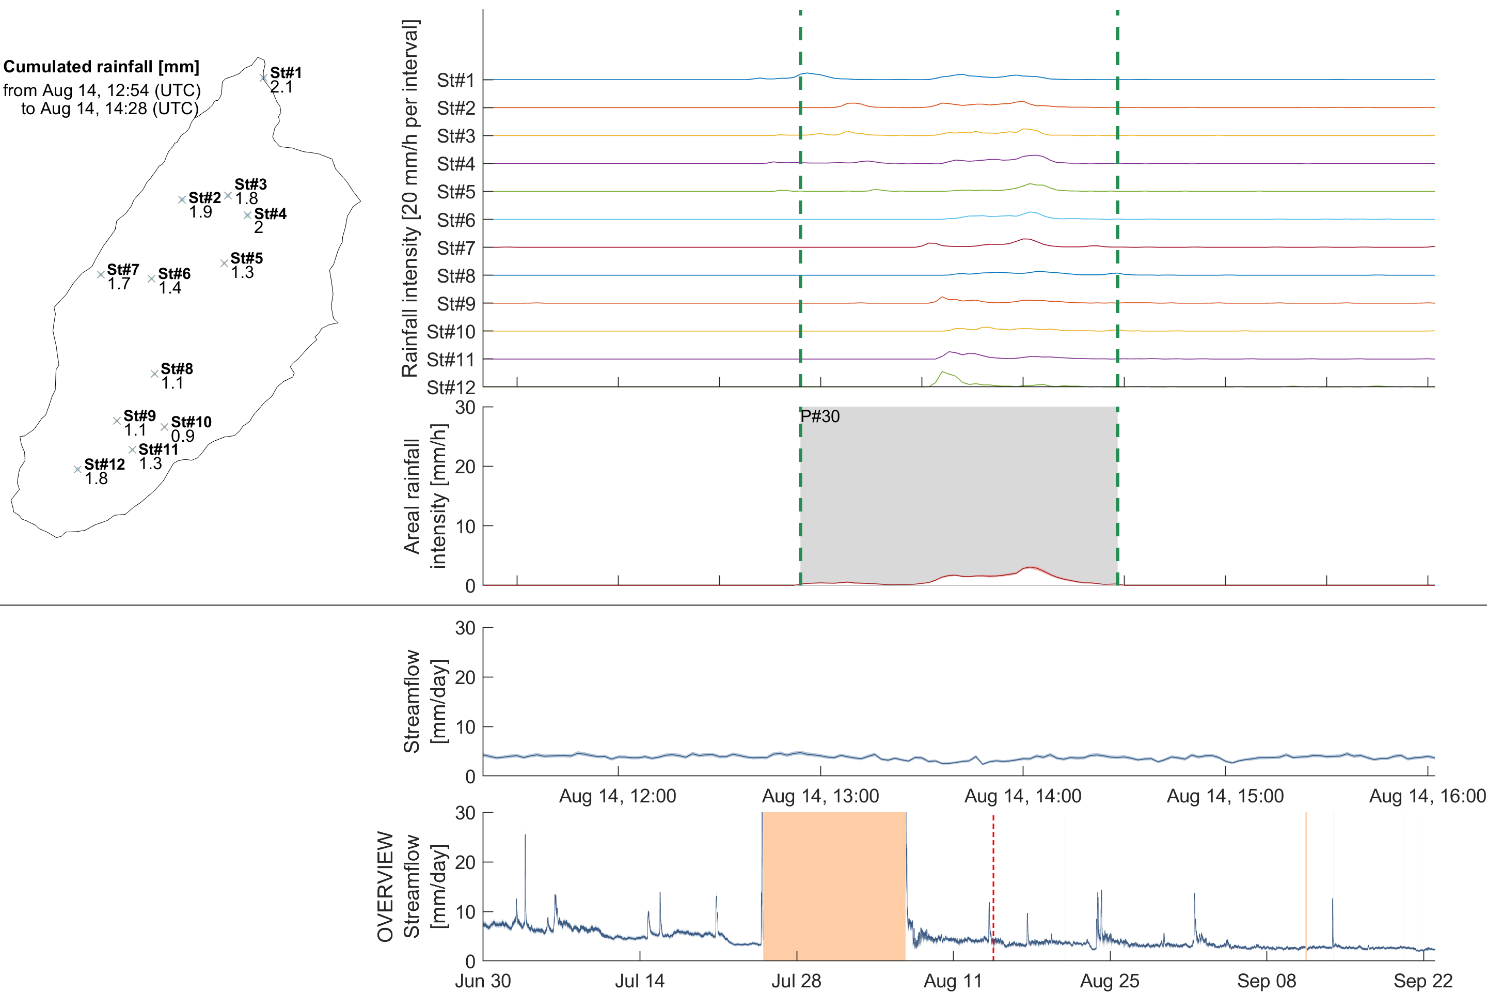


Figure S30. Precipitation event No. 30 from August 14th 12:54 PM to August 14th 02:28 PM


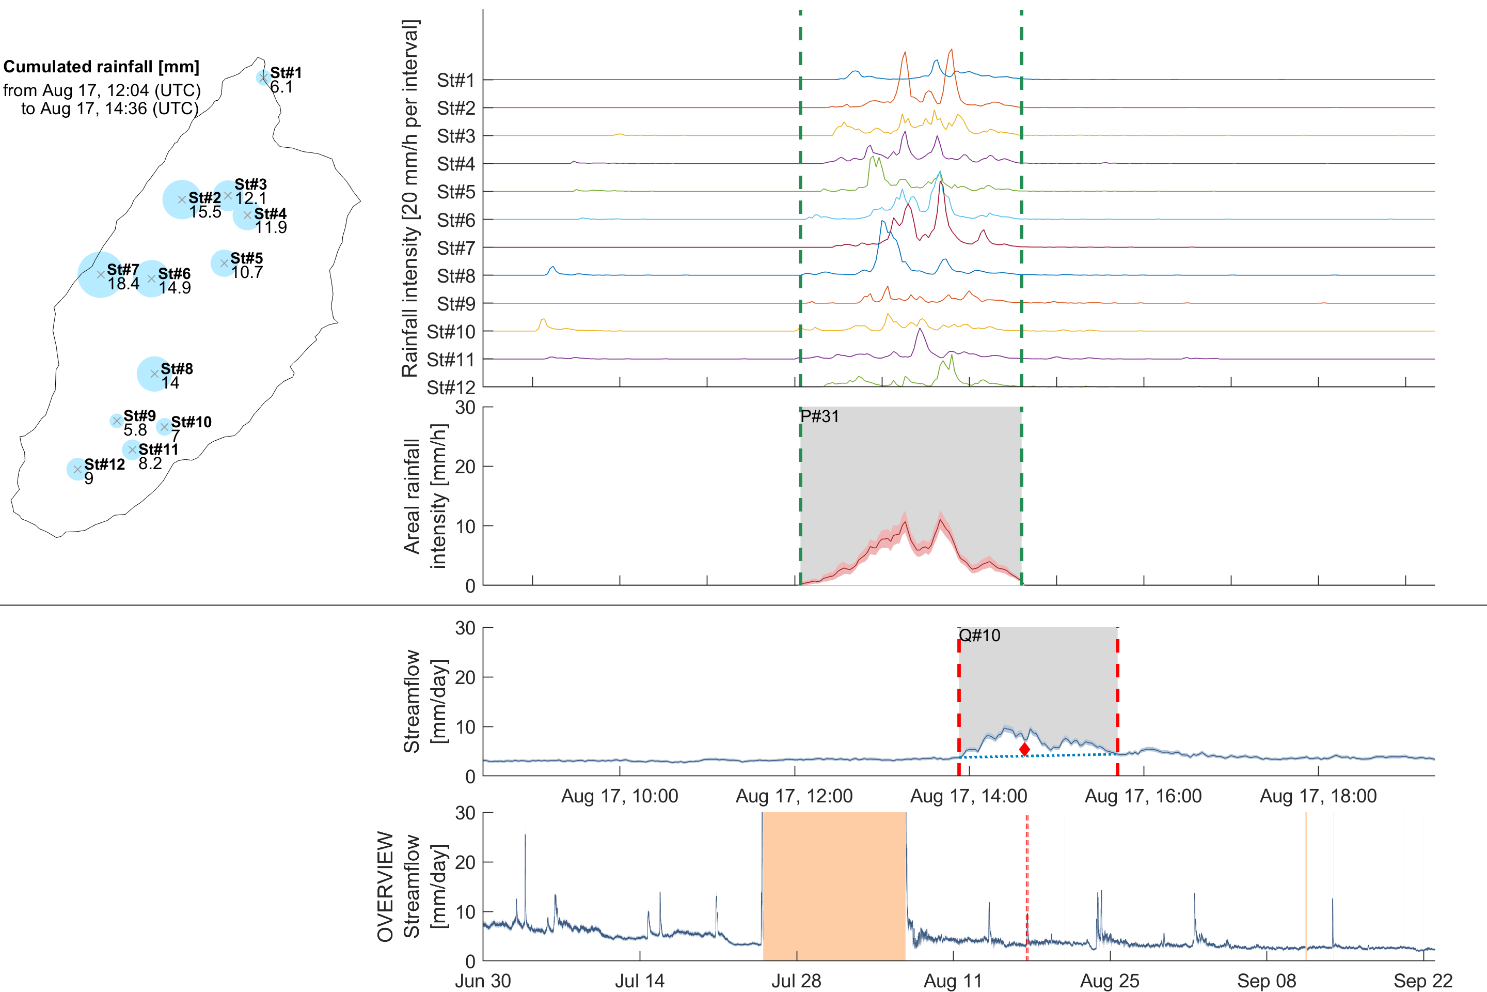


Figure S31. Precipitation event No. 31 from August 17th 12:04 PM to August 17th 02:36 PM
and discharge event No. 10 from August 17th 01:53 PM to August 17th 03:42 PM


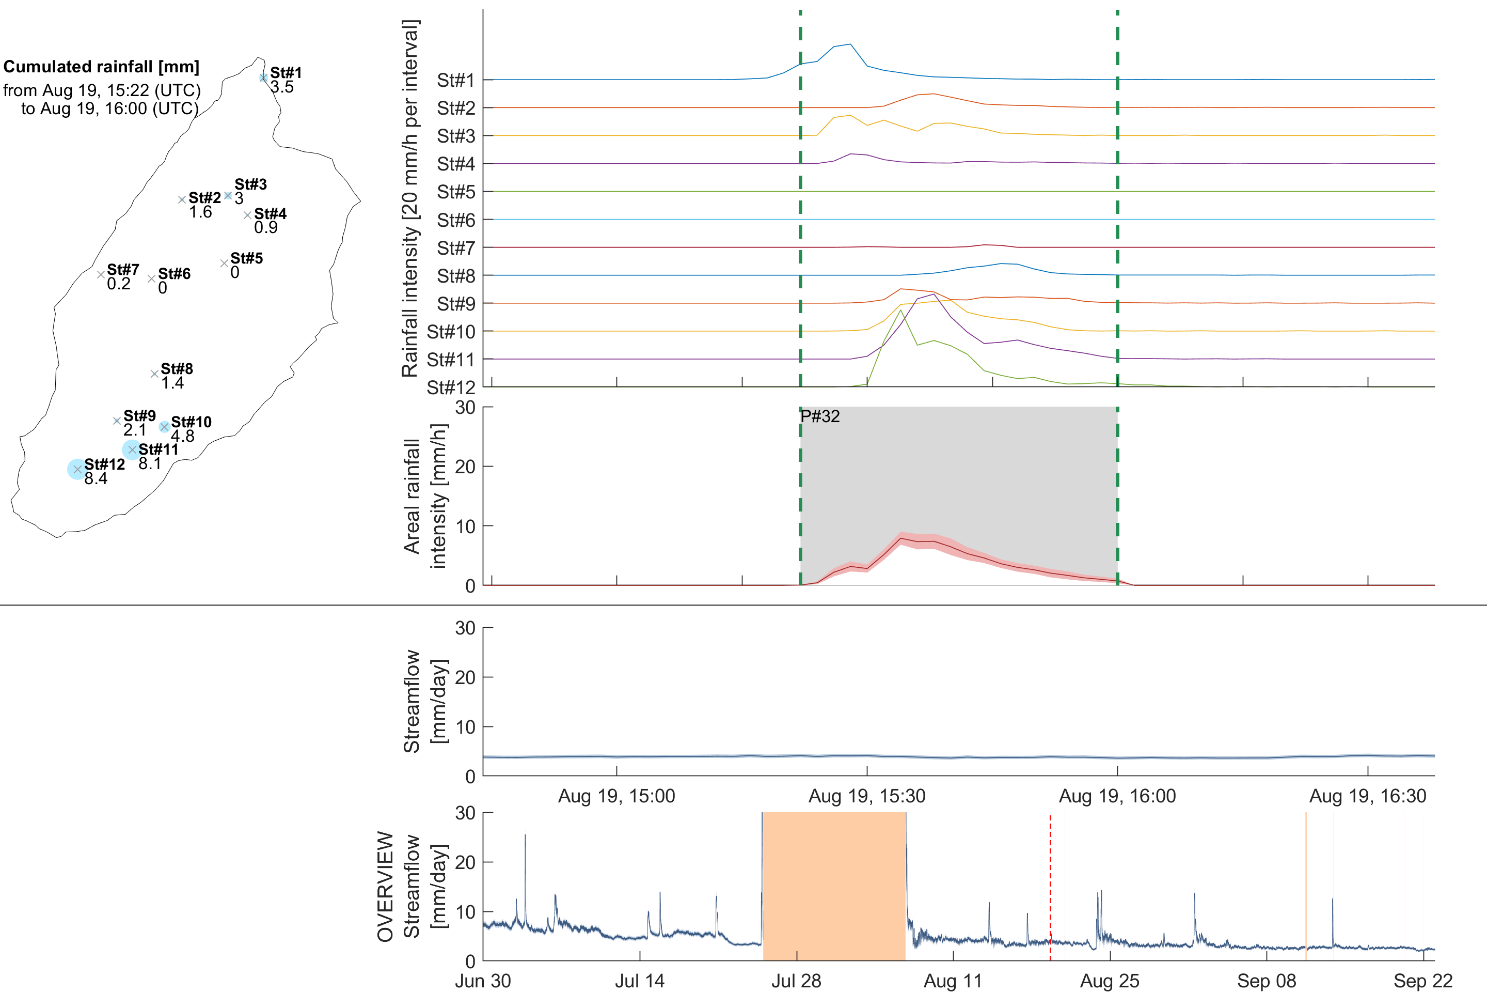


Figure S32. Precipitation event No. 32 from August 19th 03:22 PM to August 19th 04:00 PM


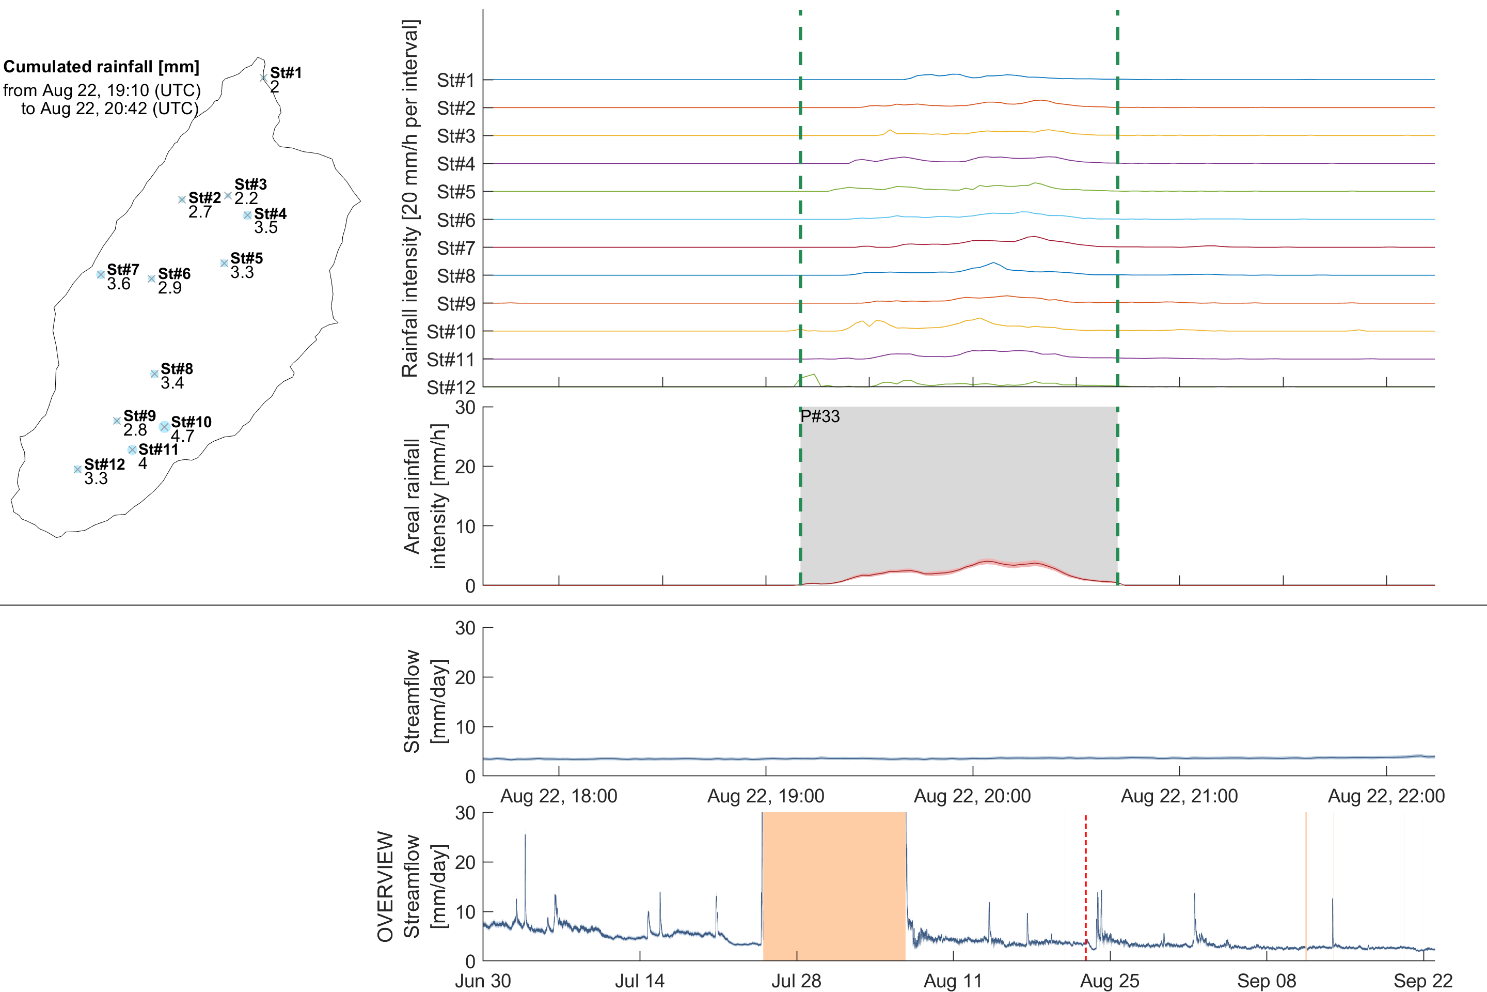


Figure S33. Precipitation event No. 33 from August 22nd 07:10 PM to August 22nd 08:42 PM


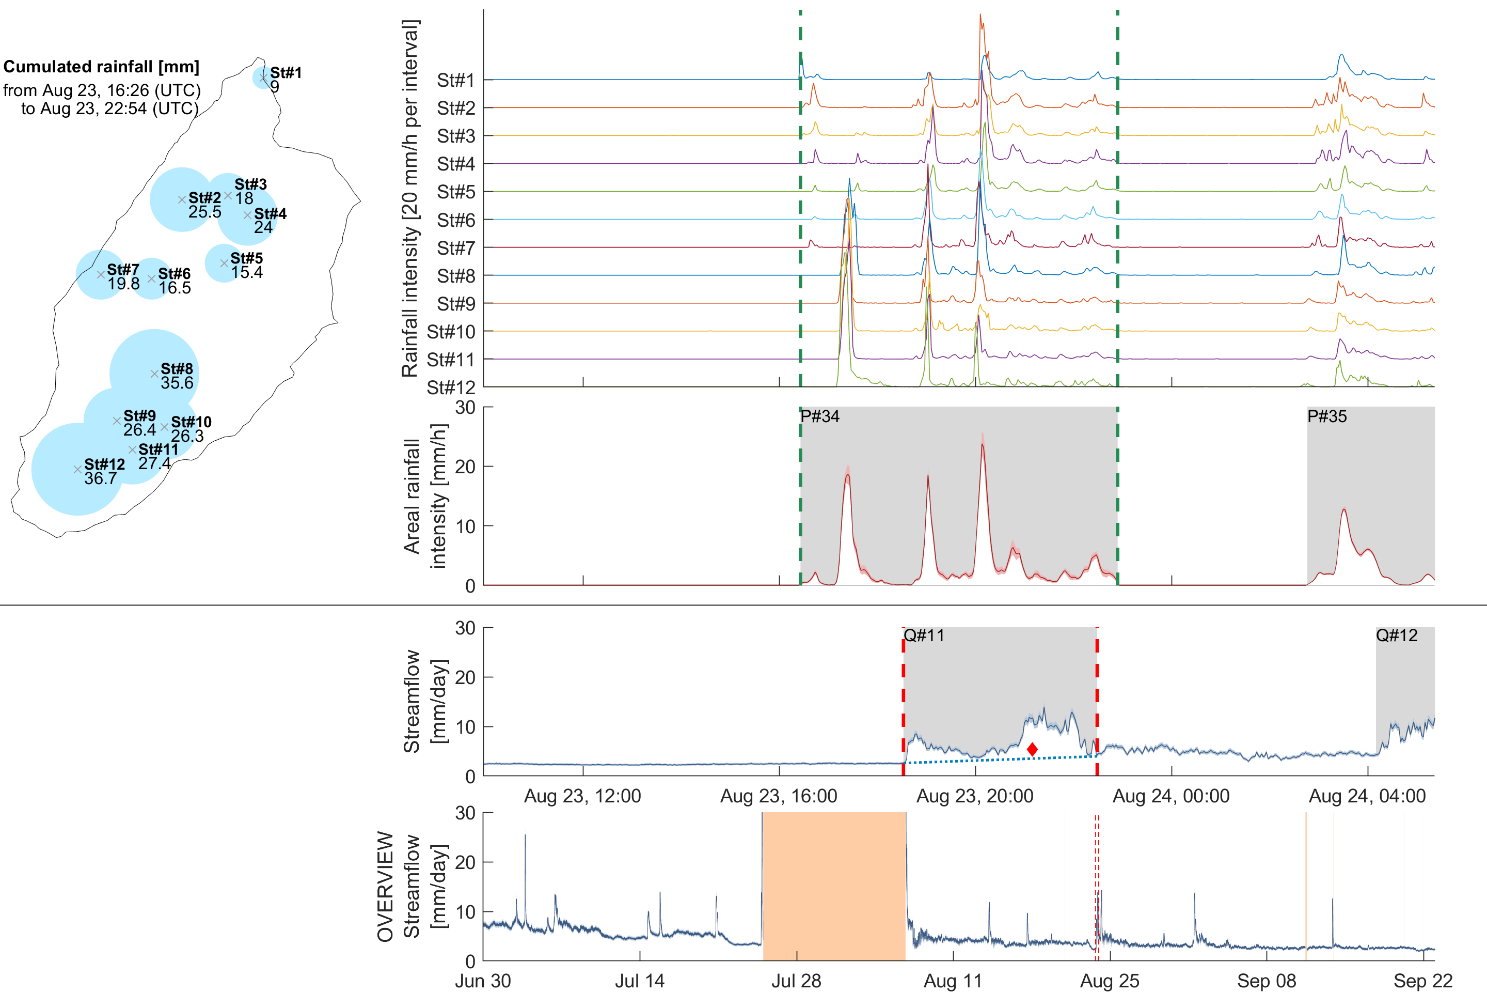


Figure S34. Precipitation event No. 34 from August 23rd 04:26 PM to August 23rd 10:54 PM
and discharge event No. 11 from August 23rd 06:32 PM to August 23rd 10:29 PM


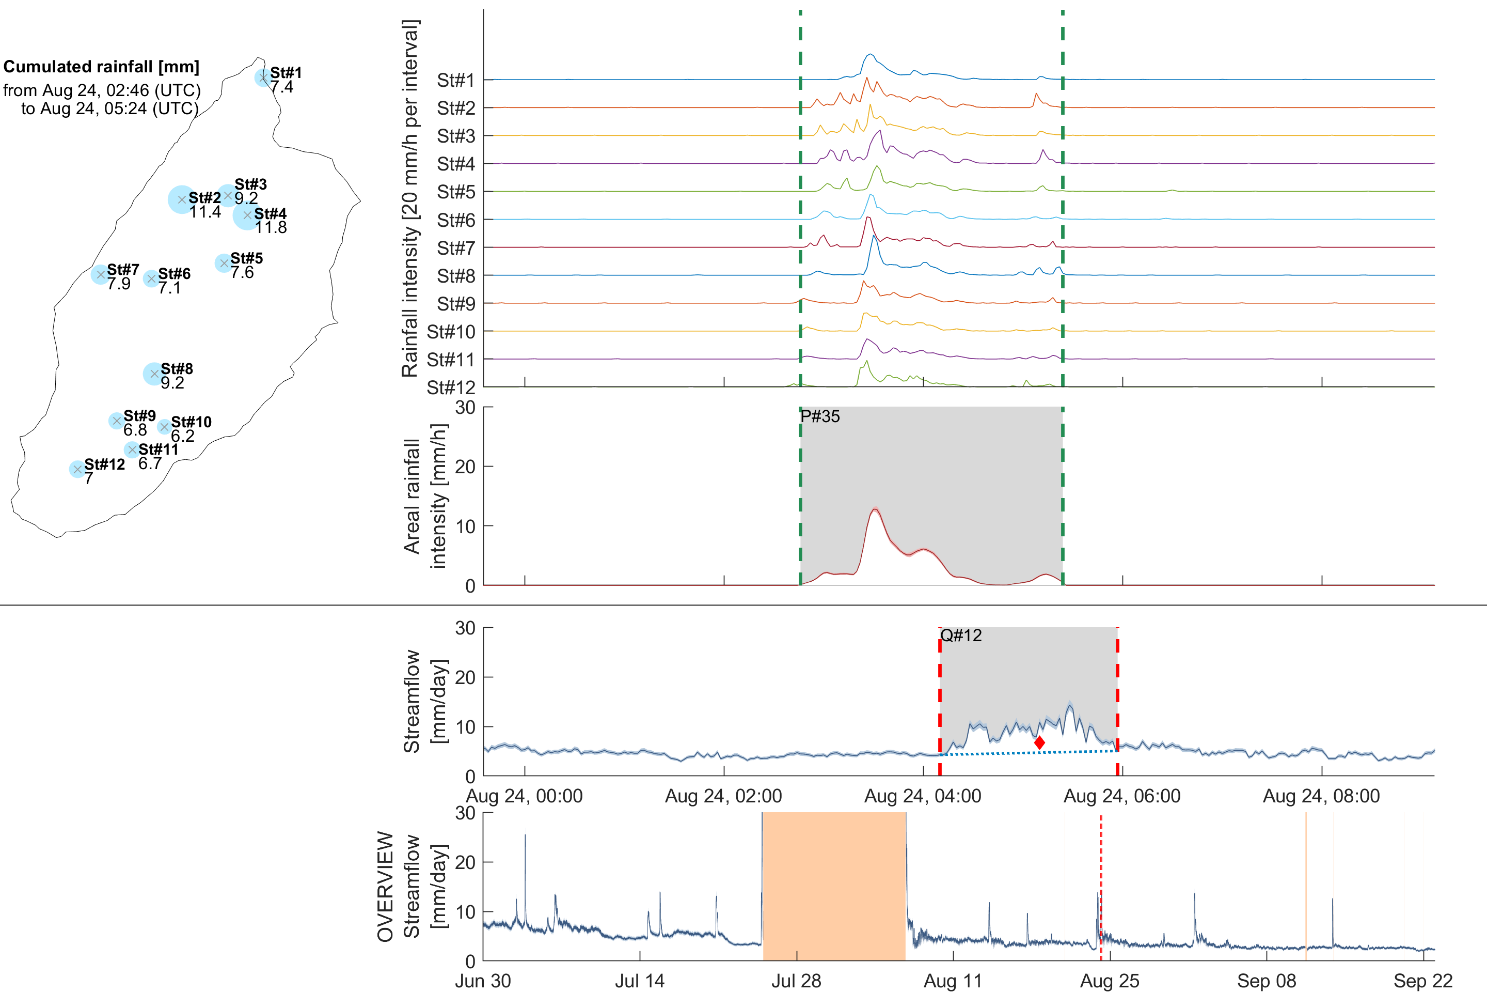


Figure S35. Precipitation event No. 35 from August 24th 02:46 AM to August 24th 05:24 AM
and discharge event No. 12 from August 24th 04:10 AM to August 24th 05:57 AM


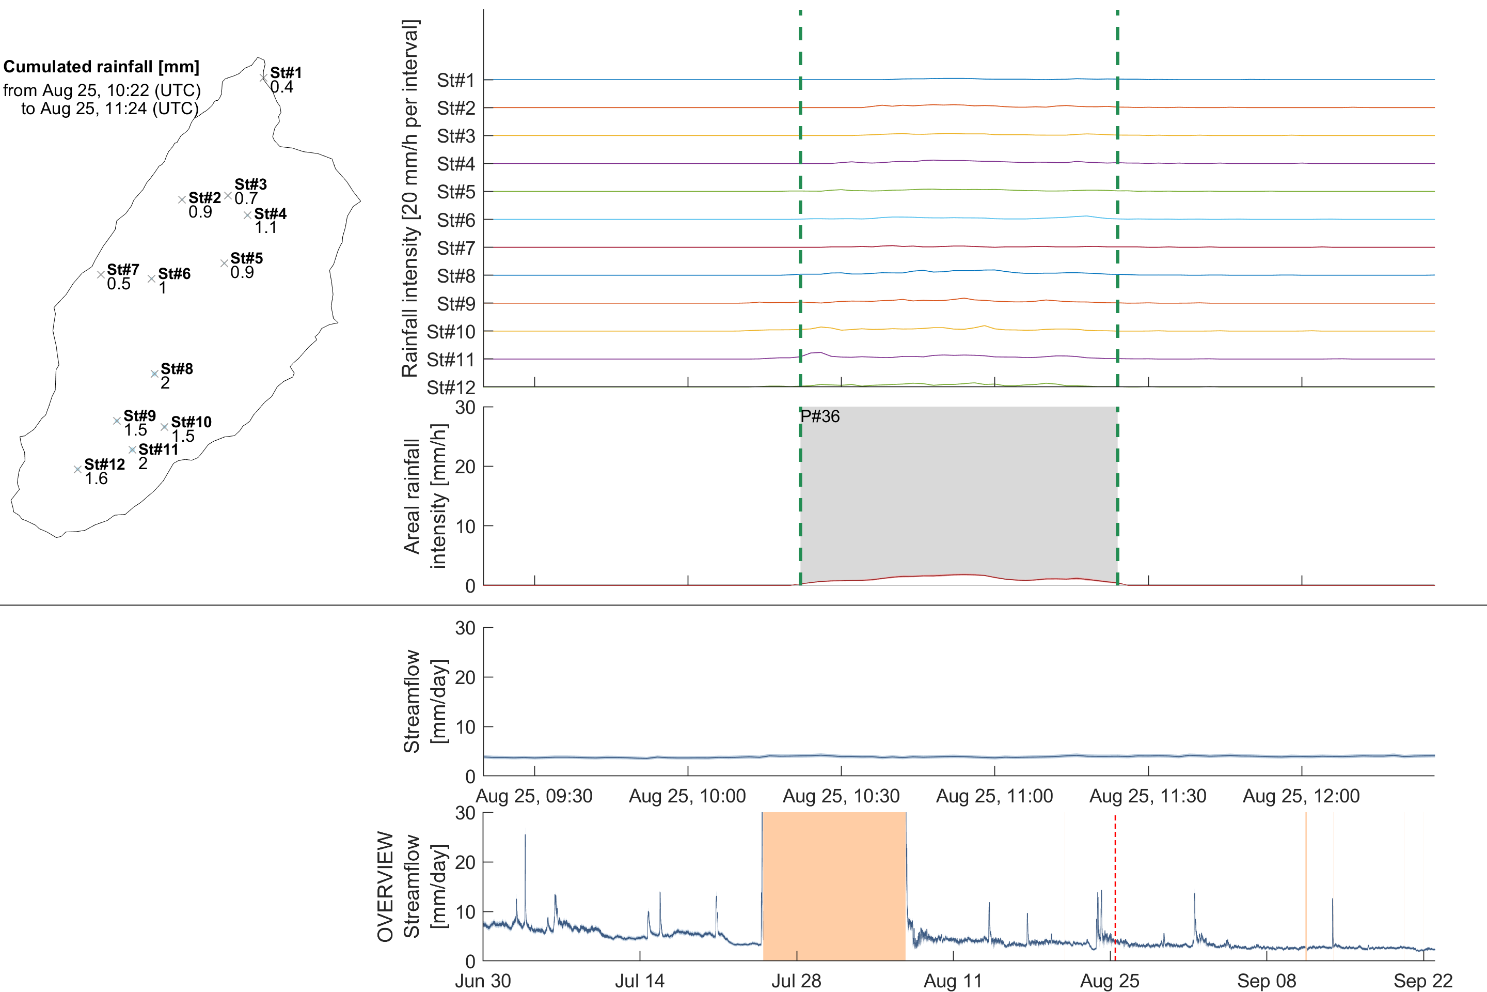


Figure S36. Precipitation event No. 36 from August 25th 10:22 AM to August 25th 11:24 AM


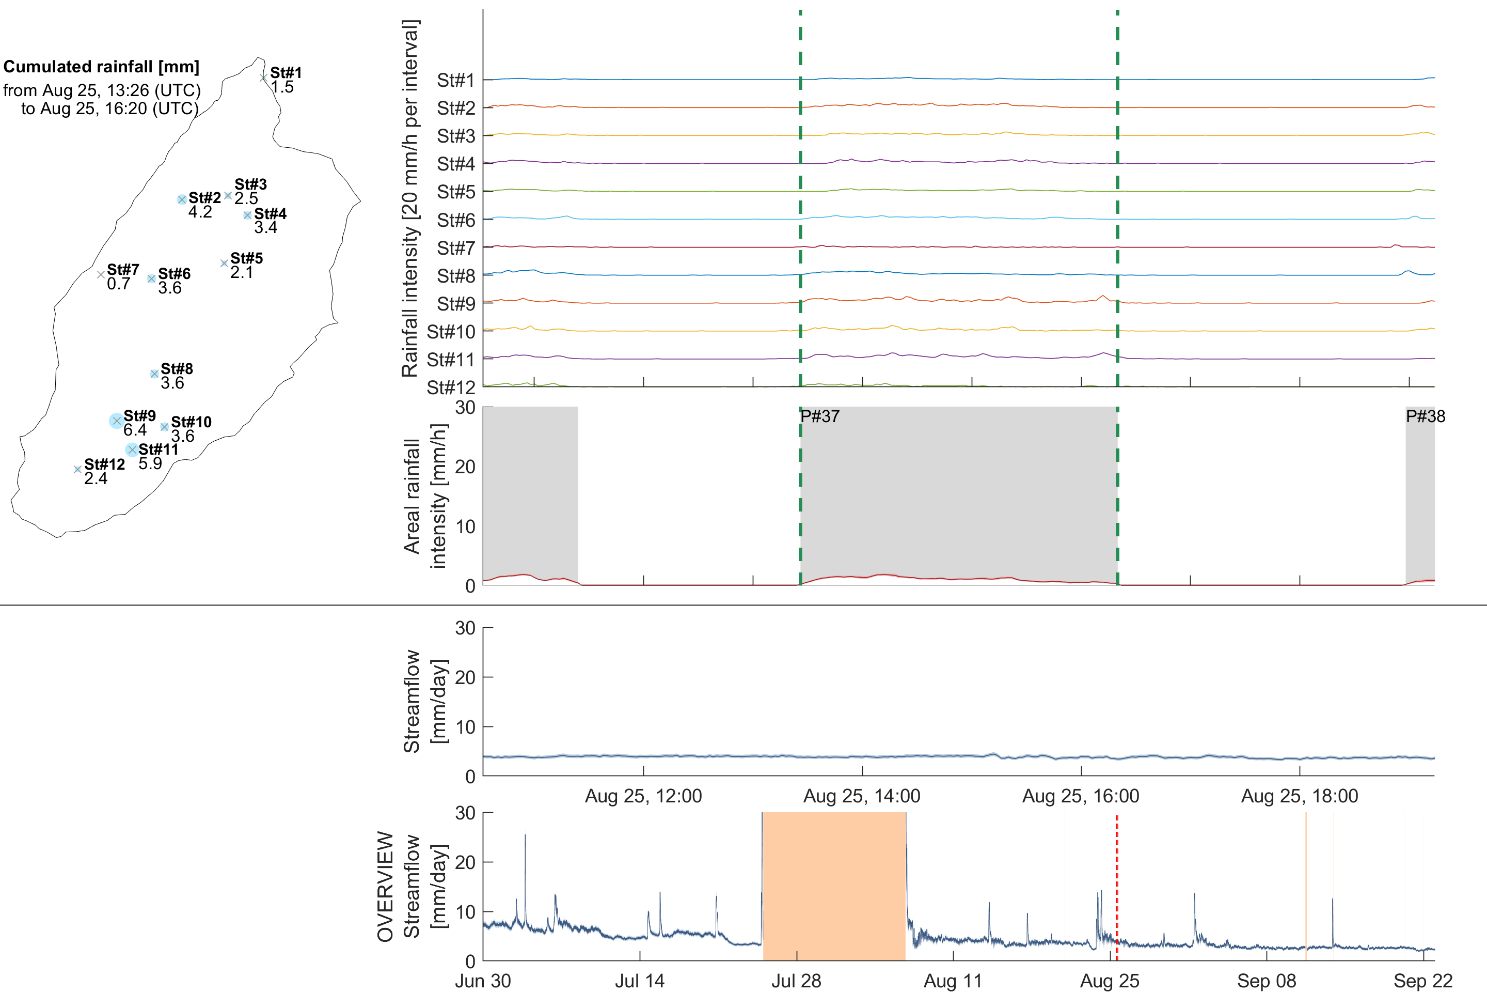


Figure S37. Precipitation event No. 37 from August 25th 01:26 PM to August 25th 04:20 PM


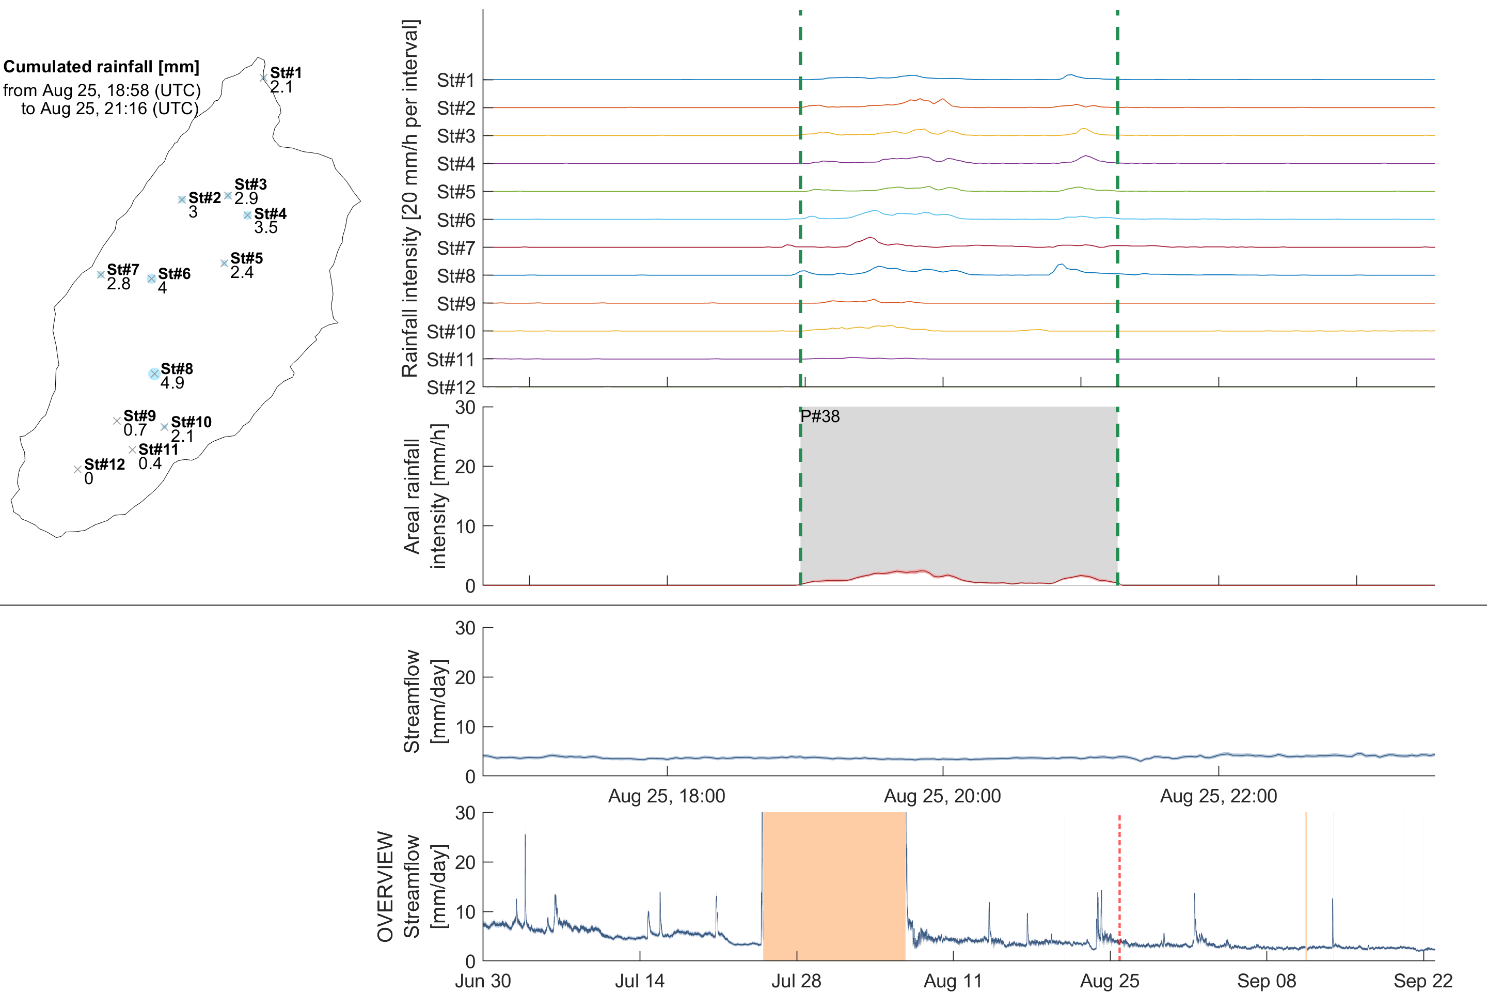


Figure S38. Precipitation event No. 38 from August 25th 06:58 PM to August 25th 09:16 PM


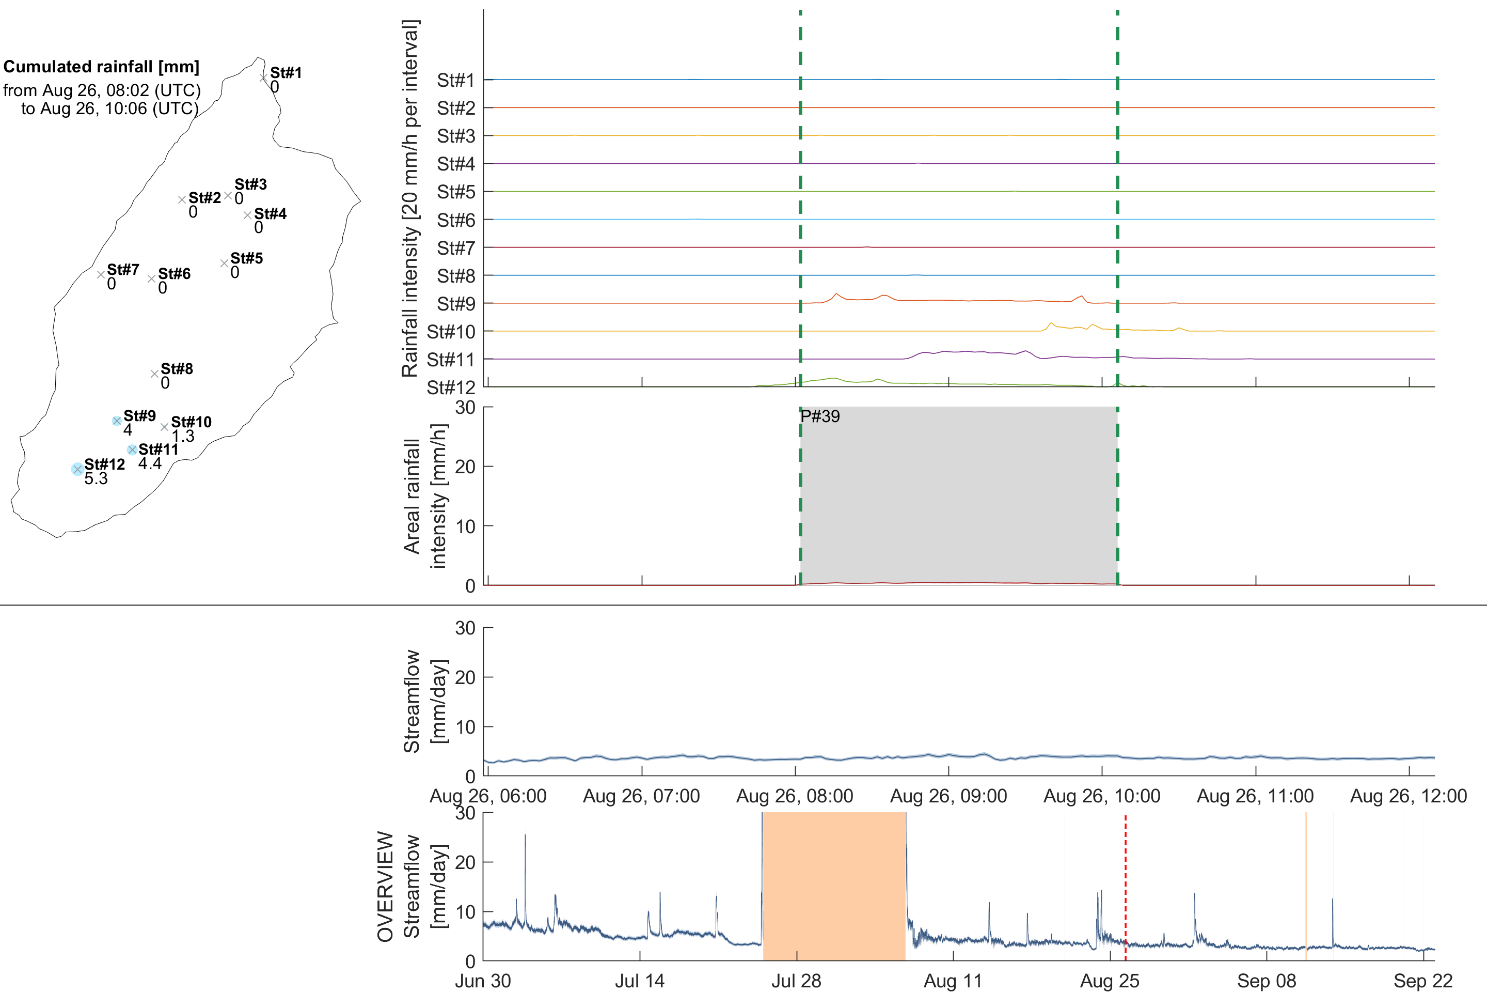


Figure S39. Precipitation event No. 39 from August 26th 08:02 AM to August 26th 10:06 AM


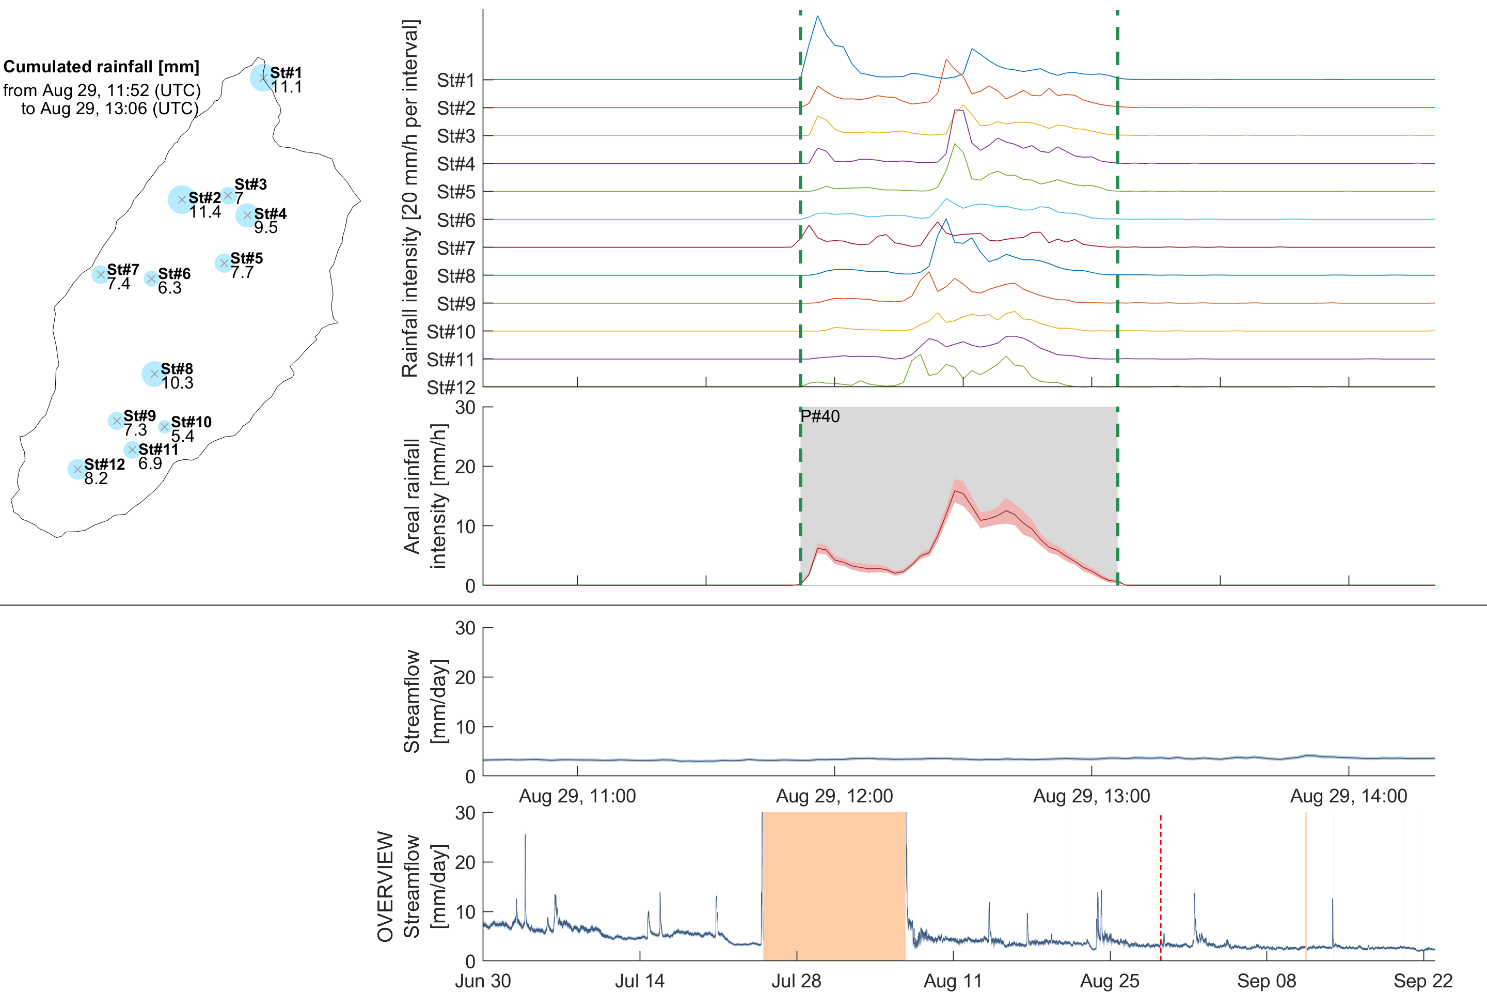


Figure S40. Precipitation event No. 40 from August 29th 11:52 AM to August 29th 01:06 PM


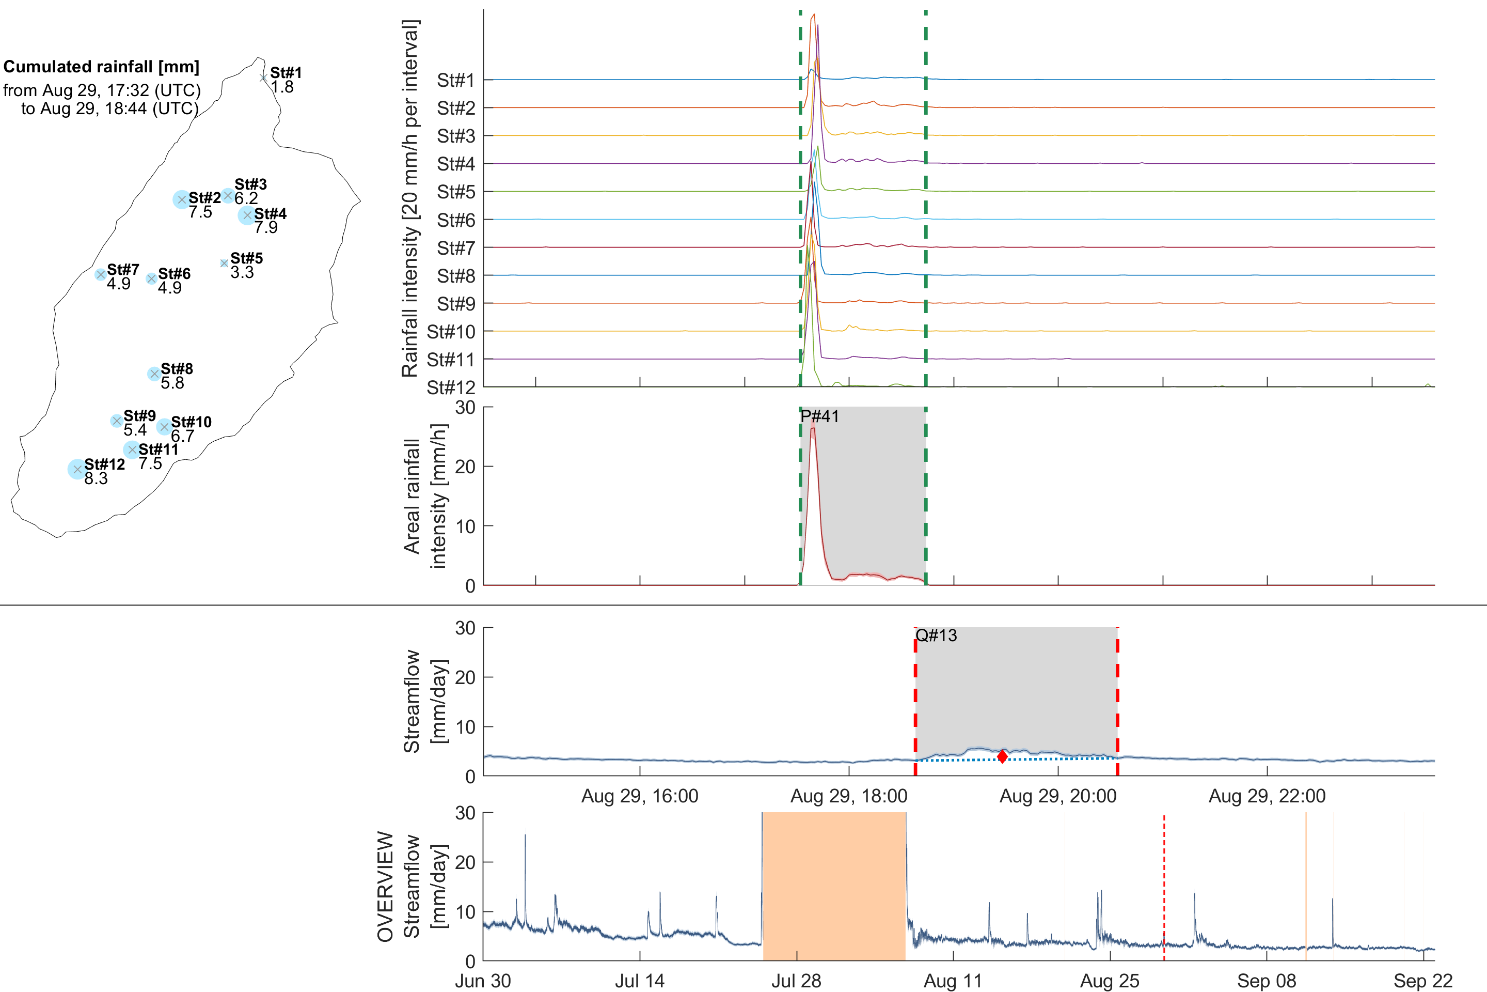


Figure S41. Precipitation event No. 41 from August 29th 05:32 PM to August 29th 06:44 PM
and discharge event No. 13 from August 29th 06:38 PM to August 29th 08:34 PM


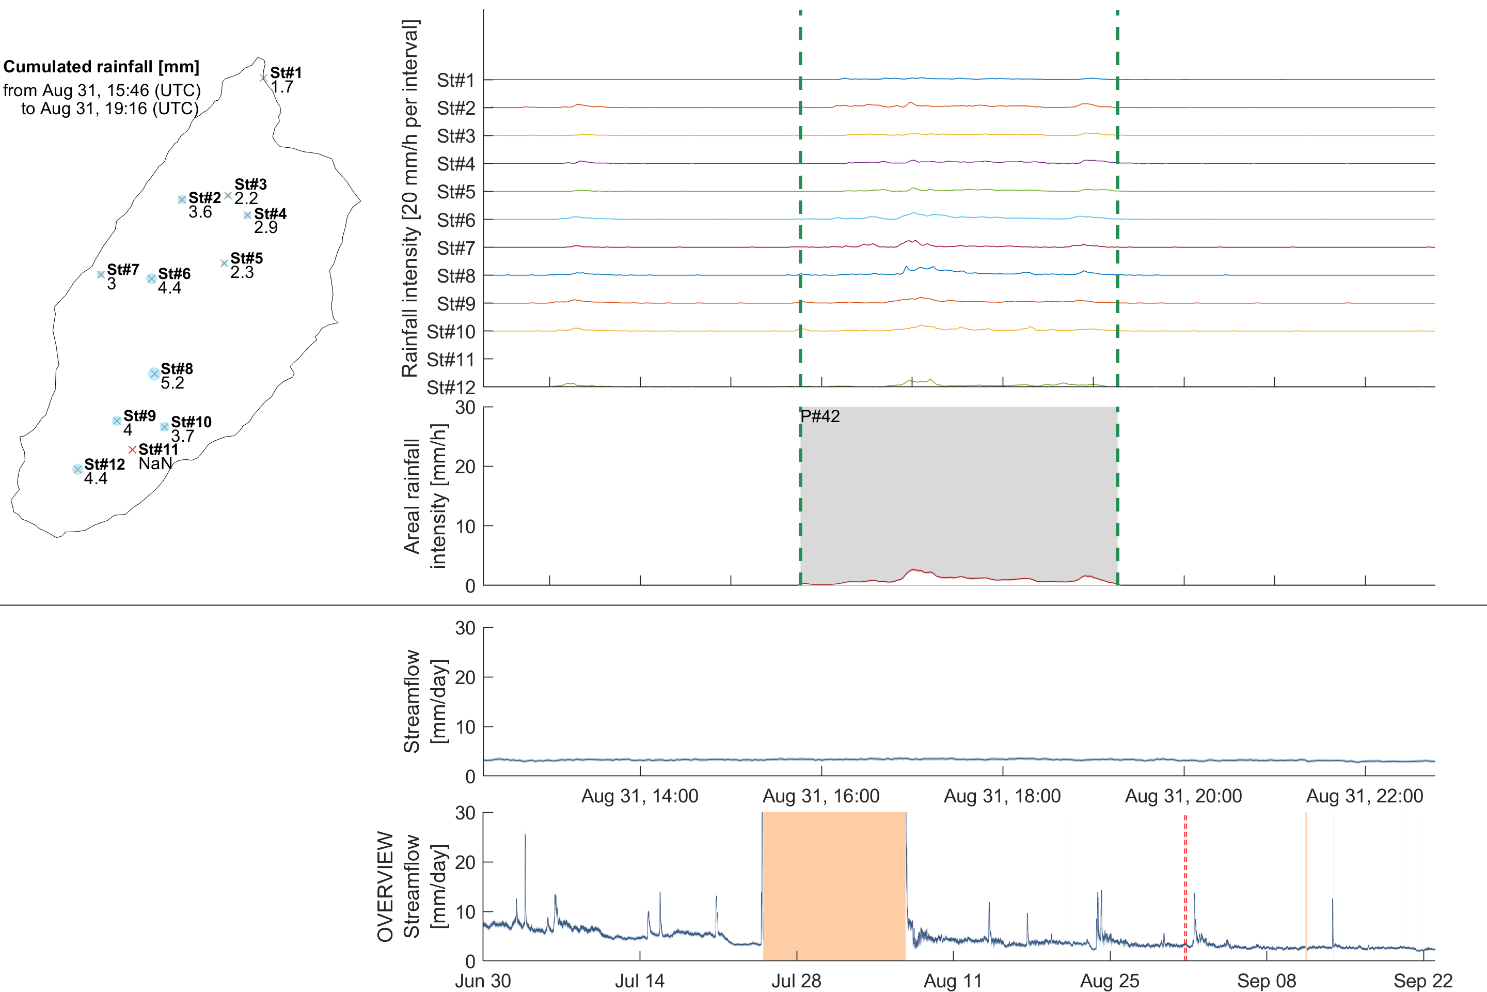


Figure S42. Precipitation event No. 42 from August 31th 03:46 PM to August 31st 07:16 PM


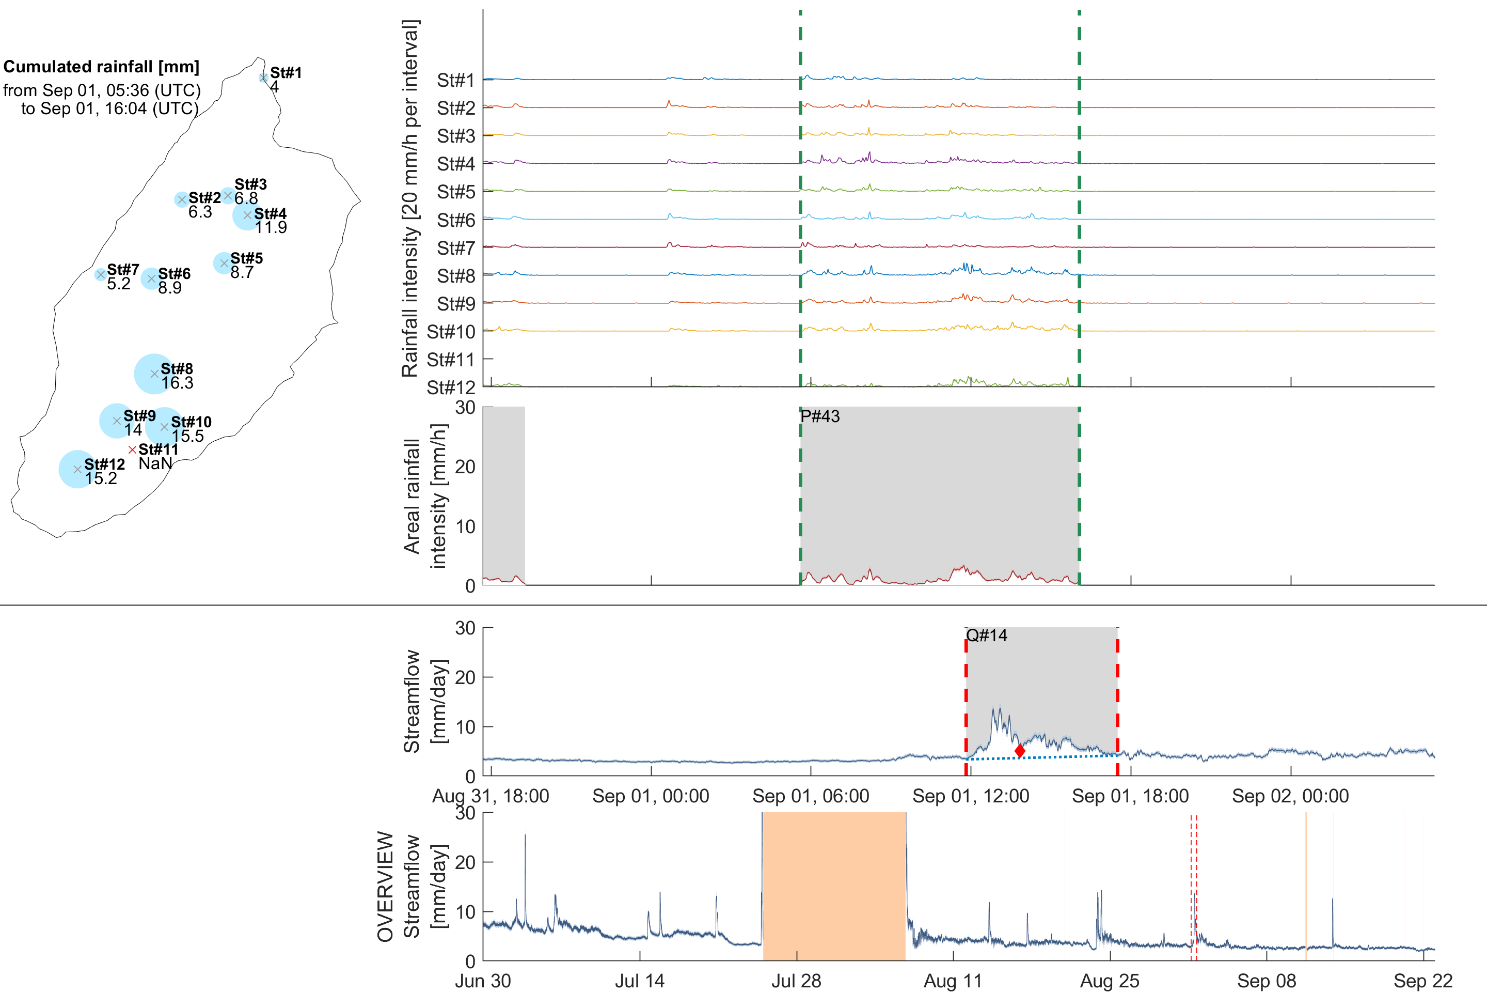


Figure S43. Precipitation event No. 43 from September 1st 05:36 AM to September 1st 04:04 PM
and discharge event No. 14 from September 1st 11:49 AM to September 1st 05:30 PM


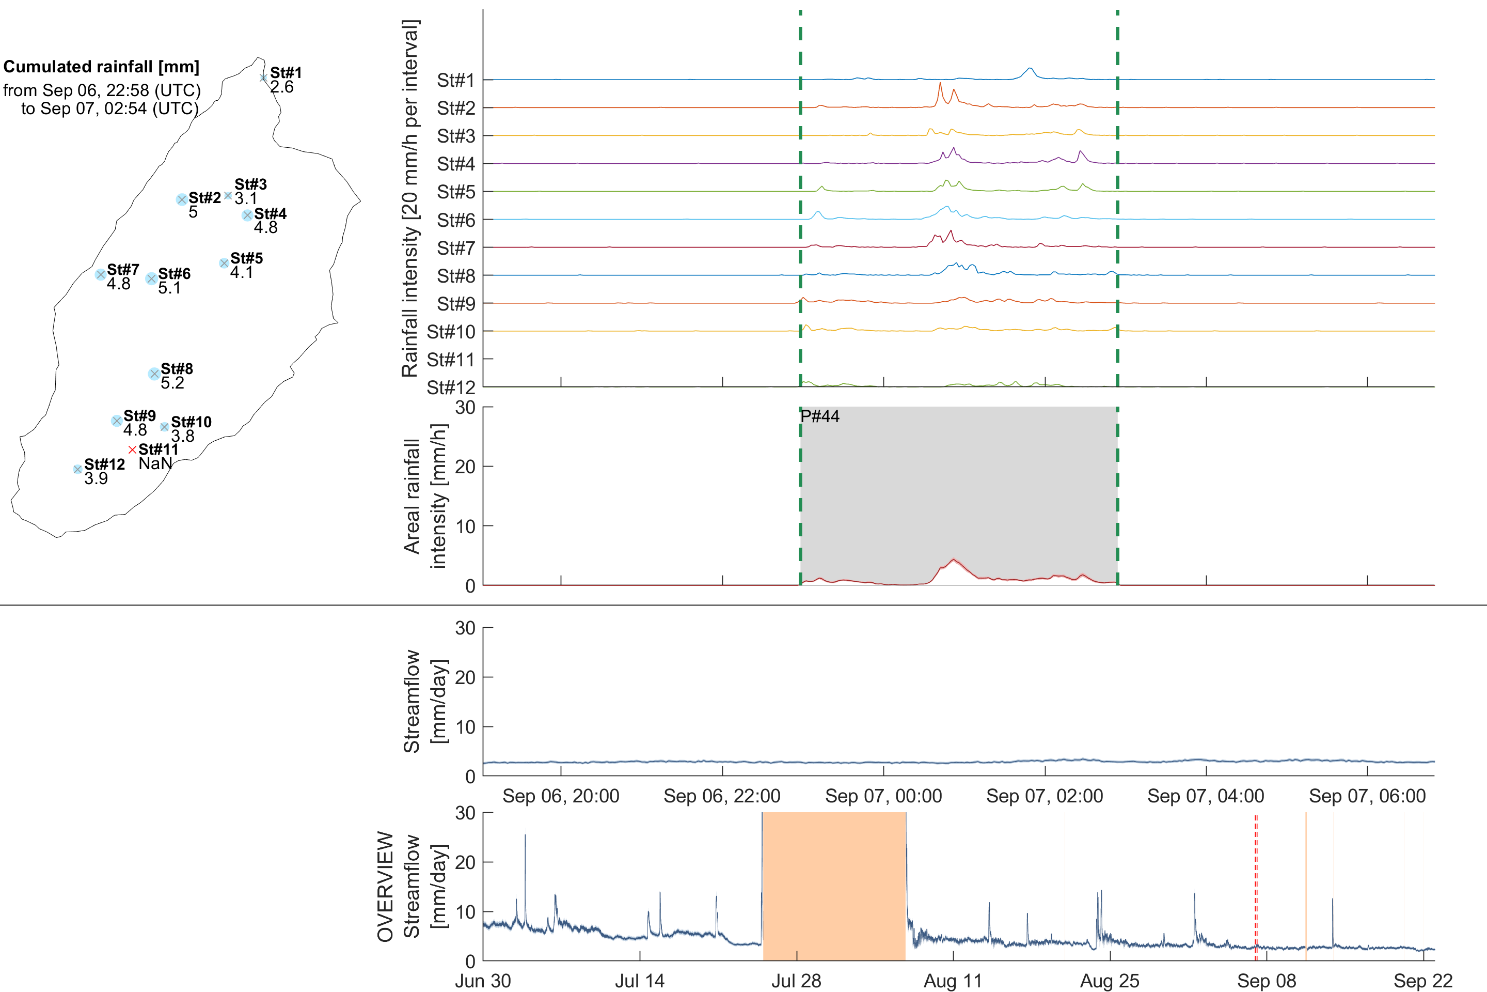


Figure S44. Precipitation event No. 44 from September 6th 10:58 PM to September 7th 02:54 AM


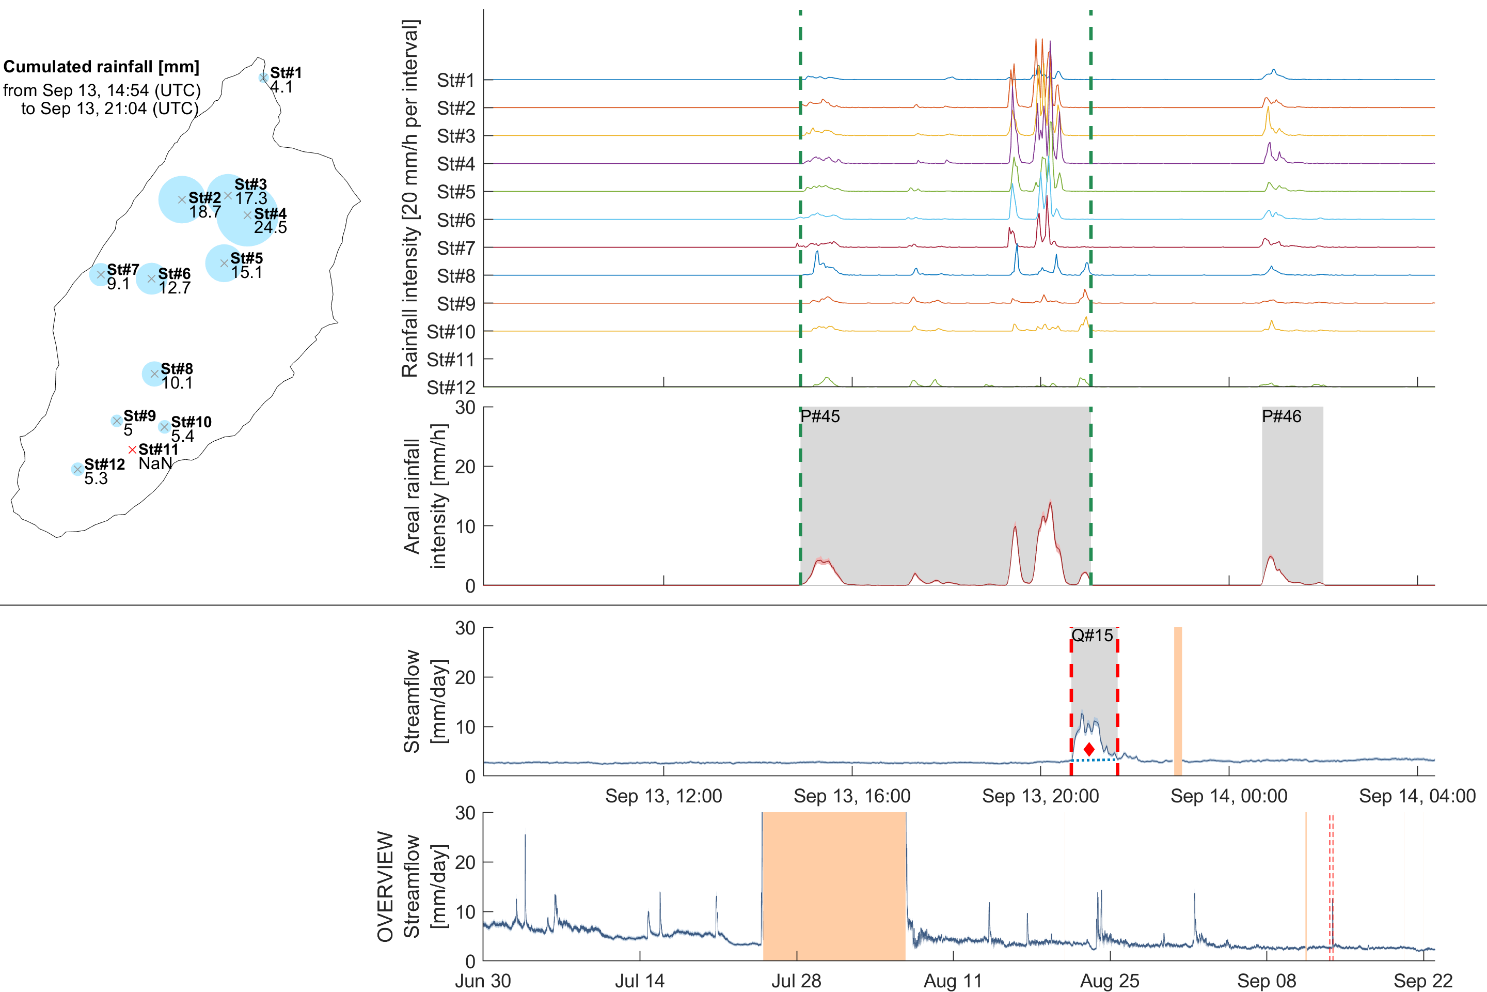


Figure S45. Precipitation event No. 45 from September 13th 02:54 PM to September 13th 09:04 PM
and discharge event No. 15 from September 13th 08:39 PM to September 13th 09:38 PM


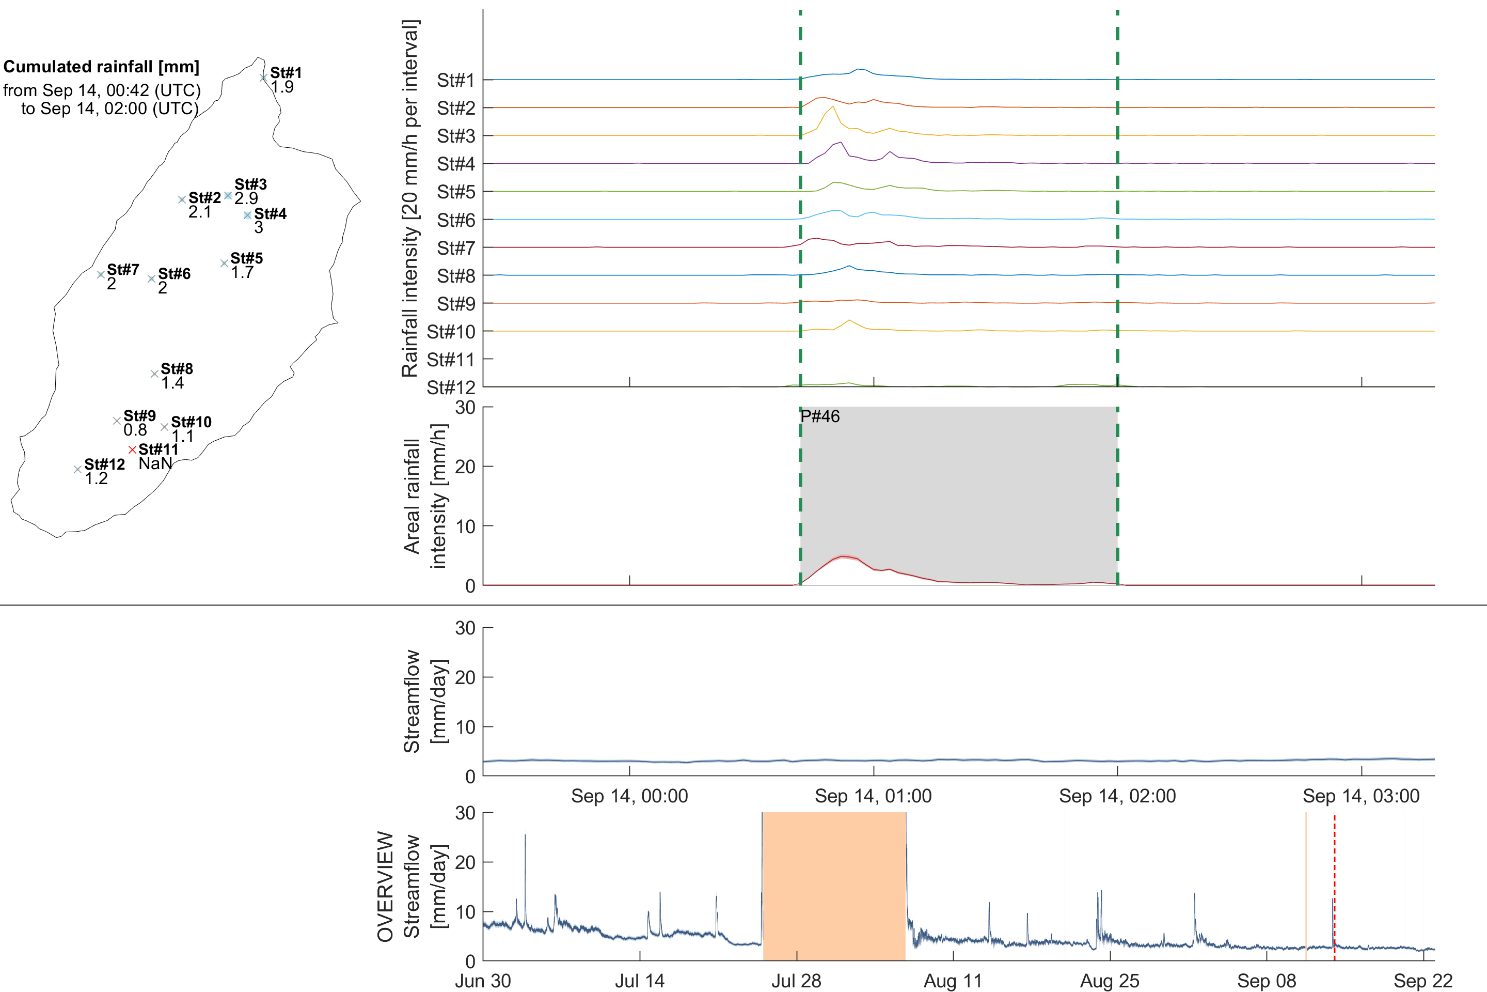


Figure S46. Precipitation event No. 46 from September 14th 12:42 AM to September 14th 02:00 AM


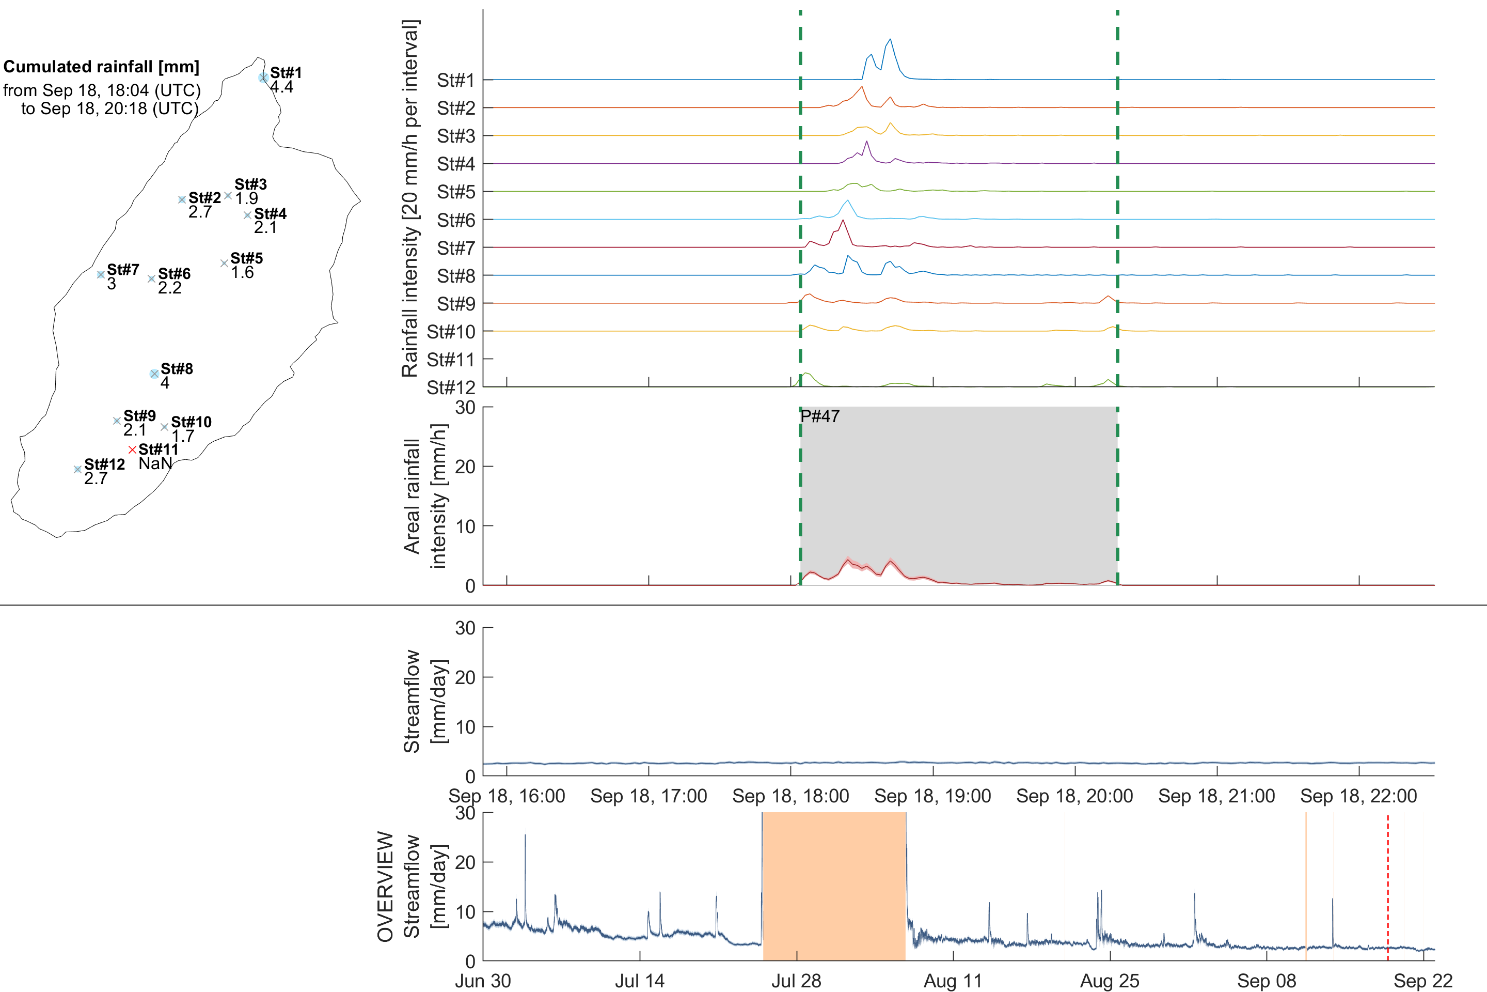


Figure S47. Precipitation event No. 47 from September 18th 06:04 PM to September 18th 08:18 PM


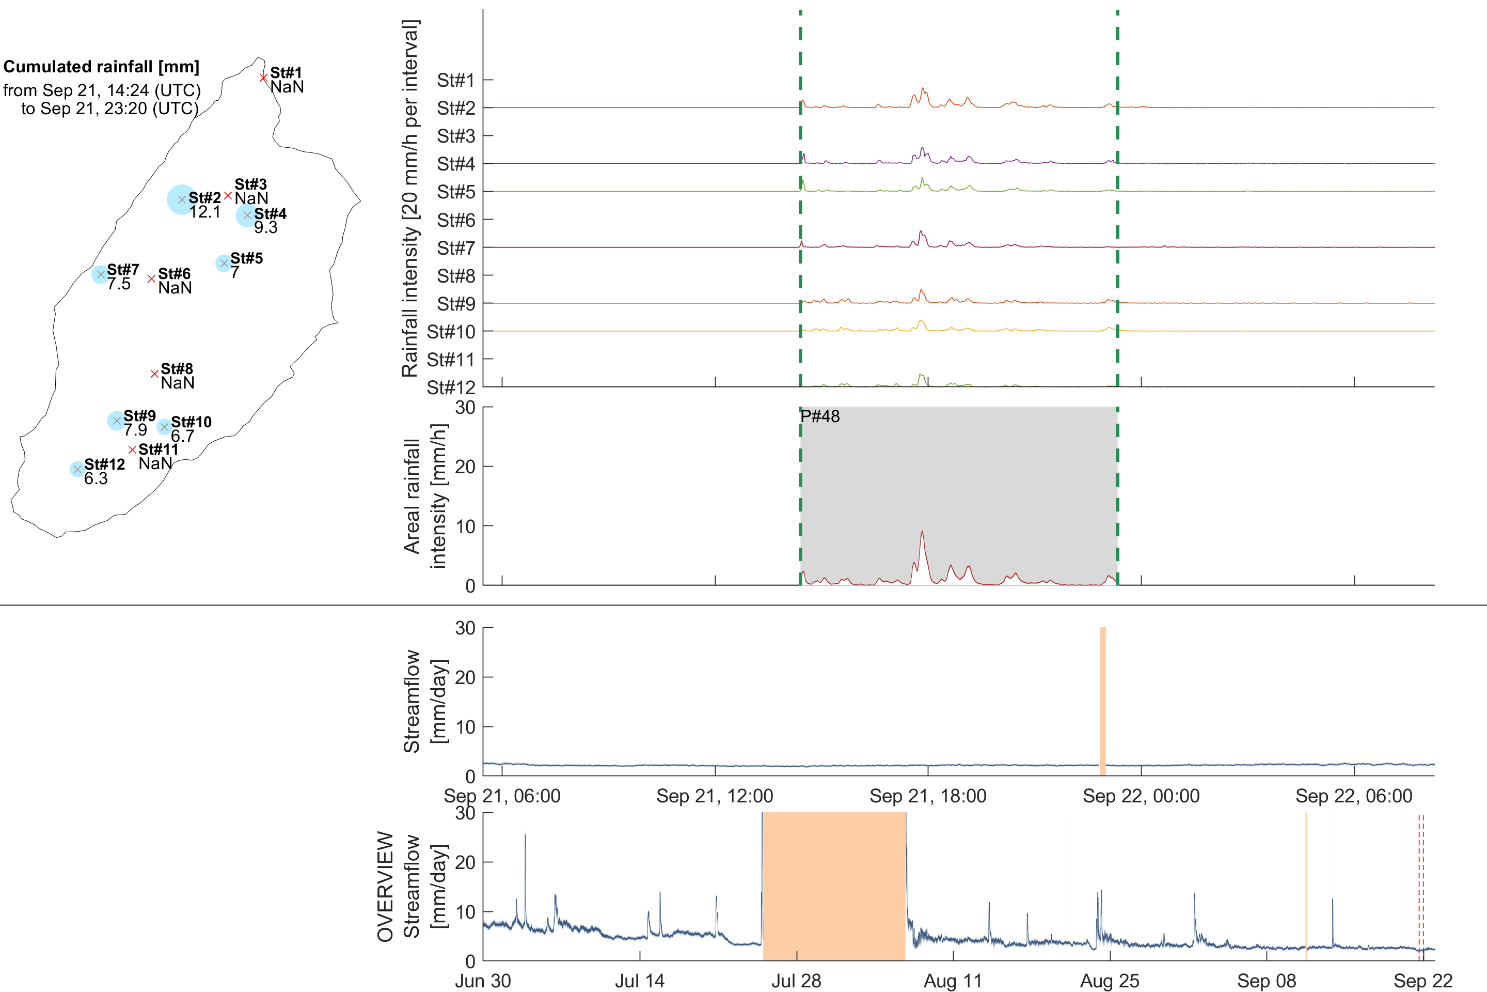


Figure S48. Precipitation event No. 48 from September 21st 02:24 PM to September 21st 11:20 PM
